# Supplementary material for: Sulfide mineralogy of igneous basic rocks (ophites) from the external zone of the Betic Cordillera
Source: Copernicus journal article supplement (doi:10.5194/ejm-37-191-2025), 2025-03-20
Supplement: Supplementary file 1 [file ejm-37-191-2025-supplement.zip]

**Sulfide mineralogy of igneous basic rocks (ophites) from the External Zone of the Betic Cordillera**

José M. González-Jiménez, Idael F. Blanco-Quintero, Lola Yesares, Claudio Marchesi, Amira R. Ferreira,  
Igor González-Pérez, Erwin Schettino, Fernando Gervilla

**Supplementary Information File S5**  
**Nanostructural analysis of magmatic sulfides**

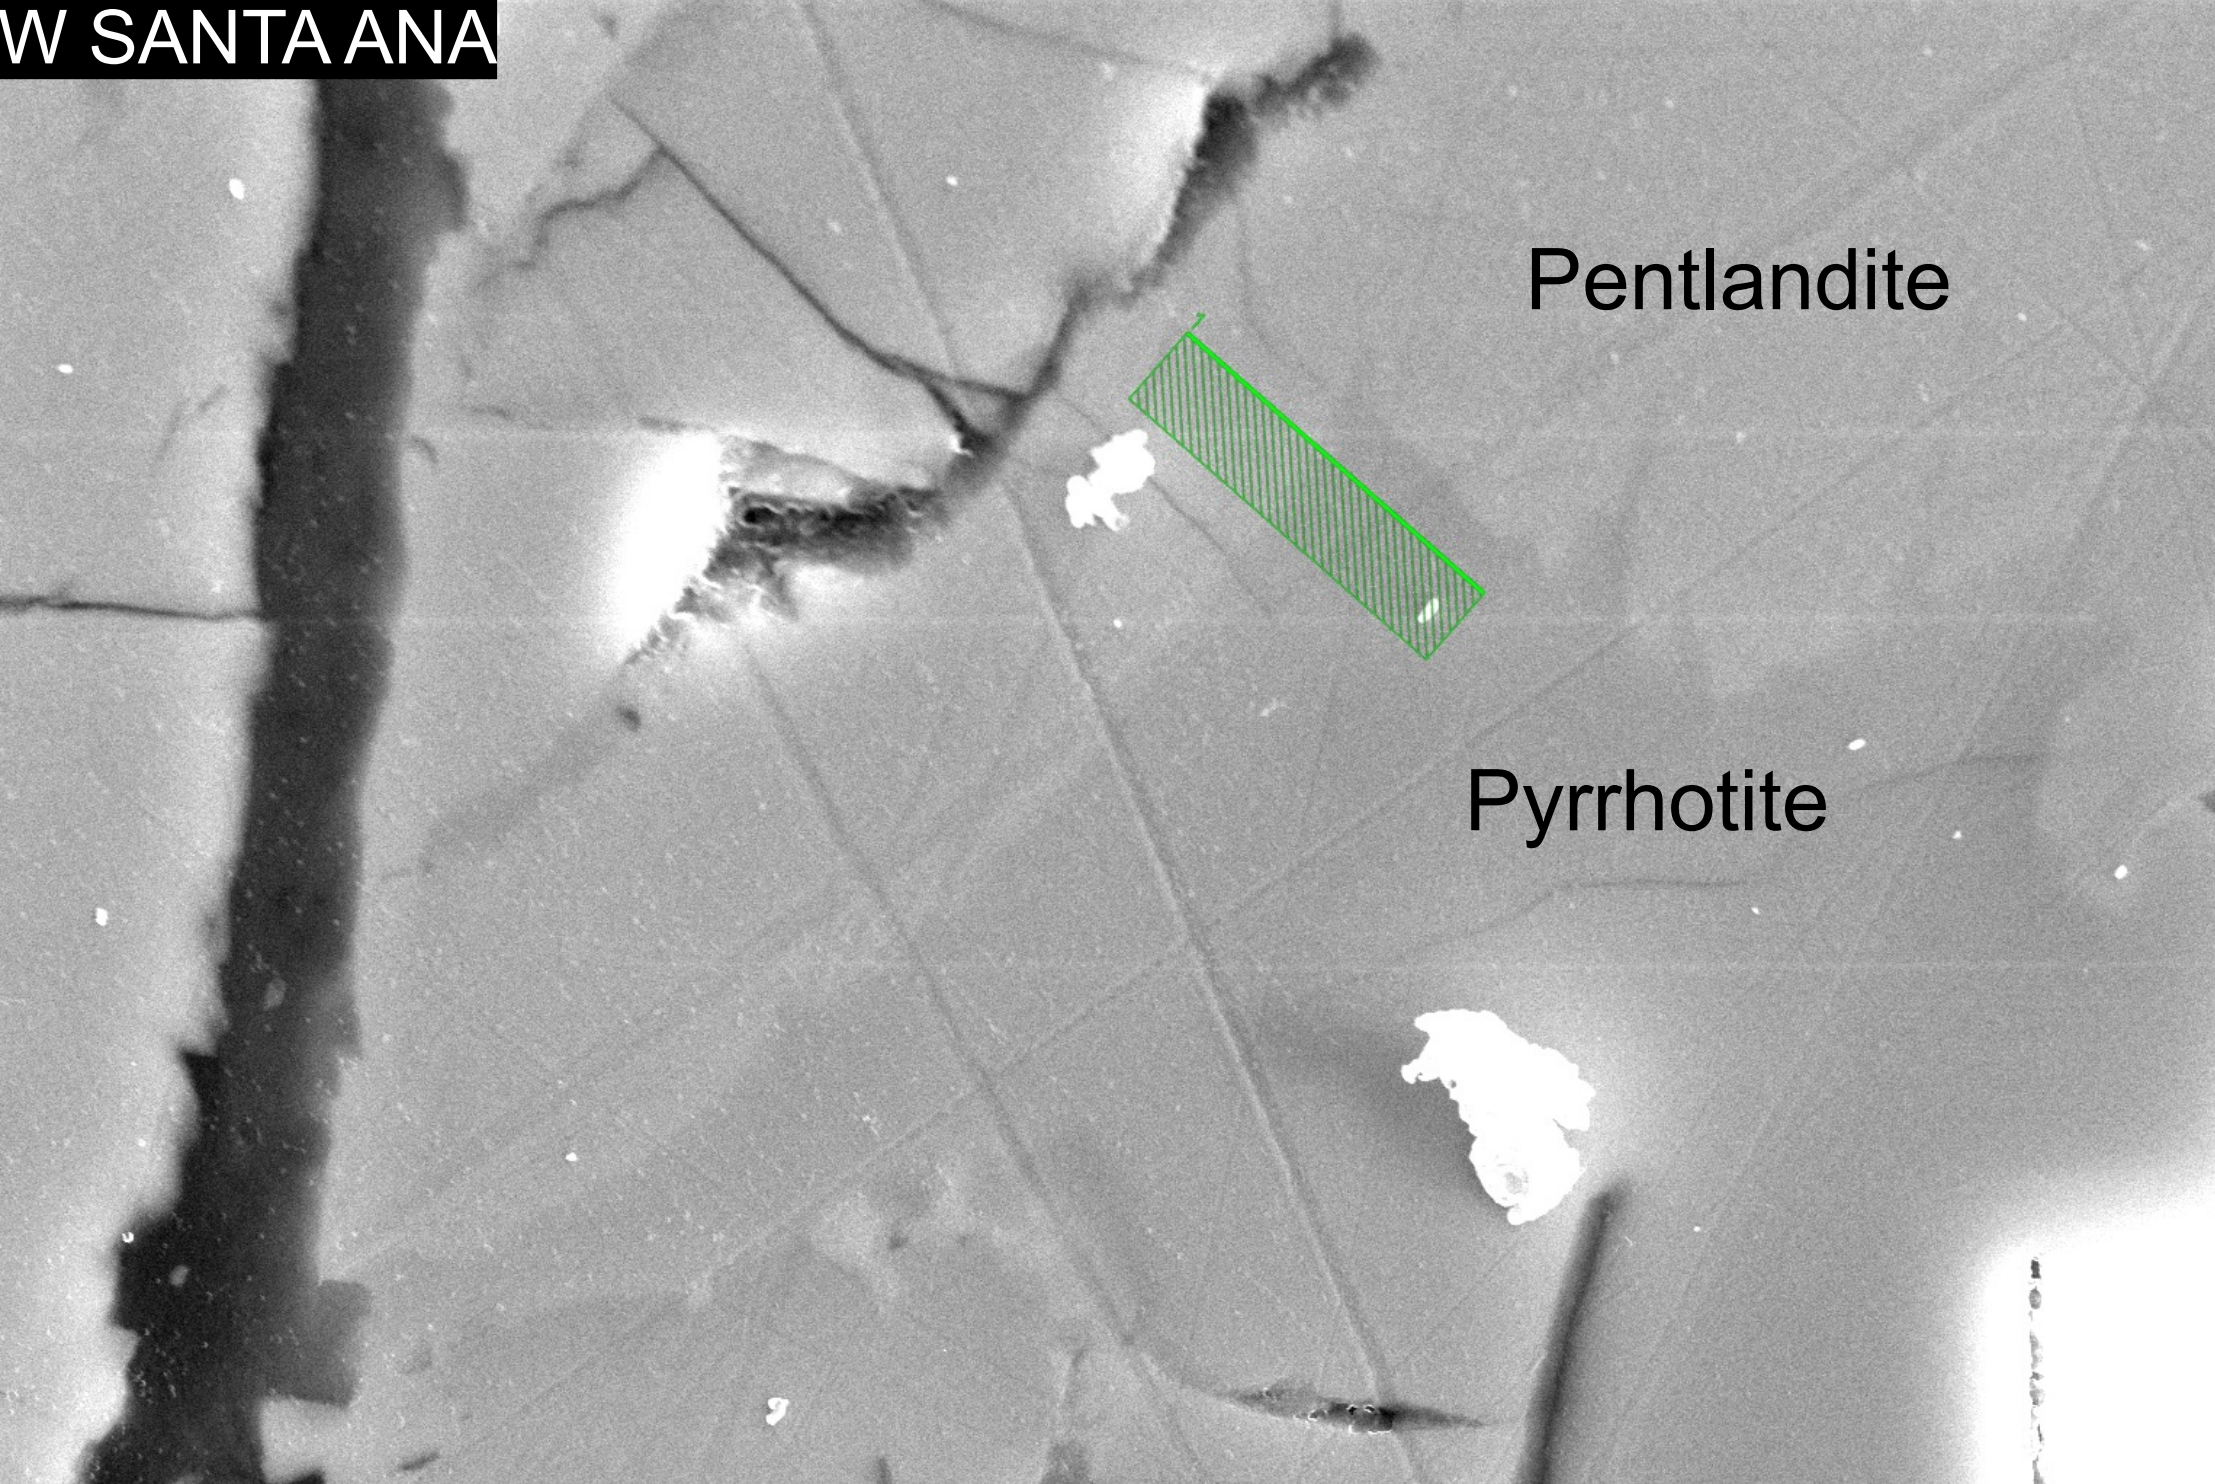

Pentlandite

Pyrrhotite



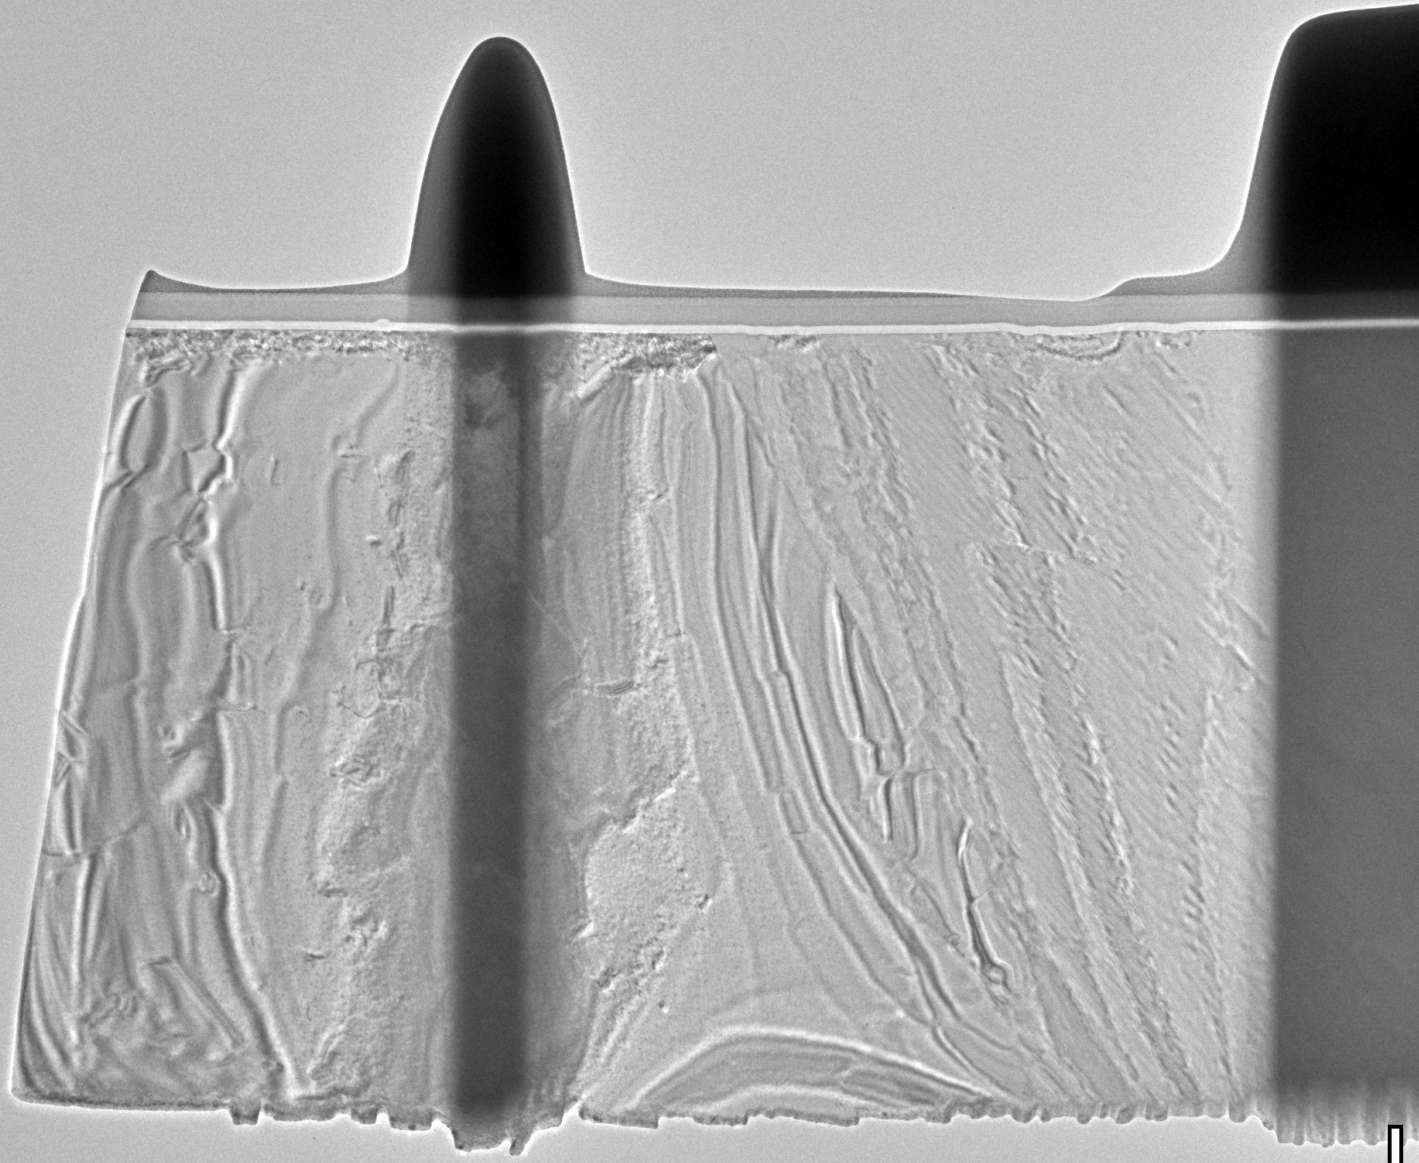

2  $\mu\text{m}$

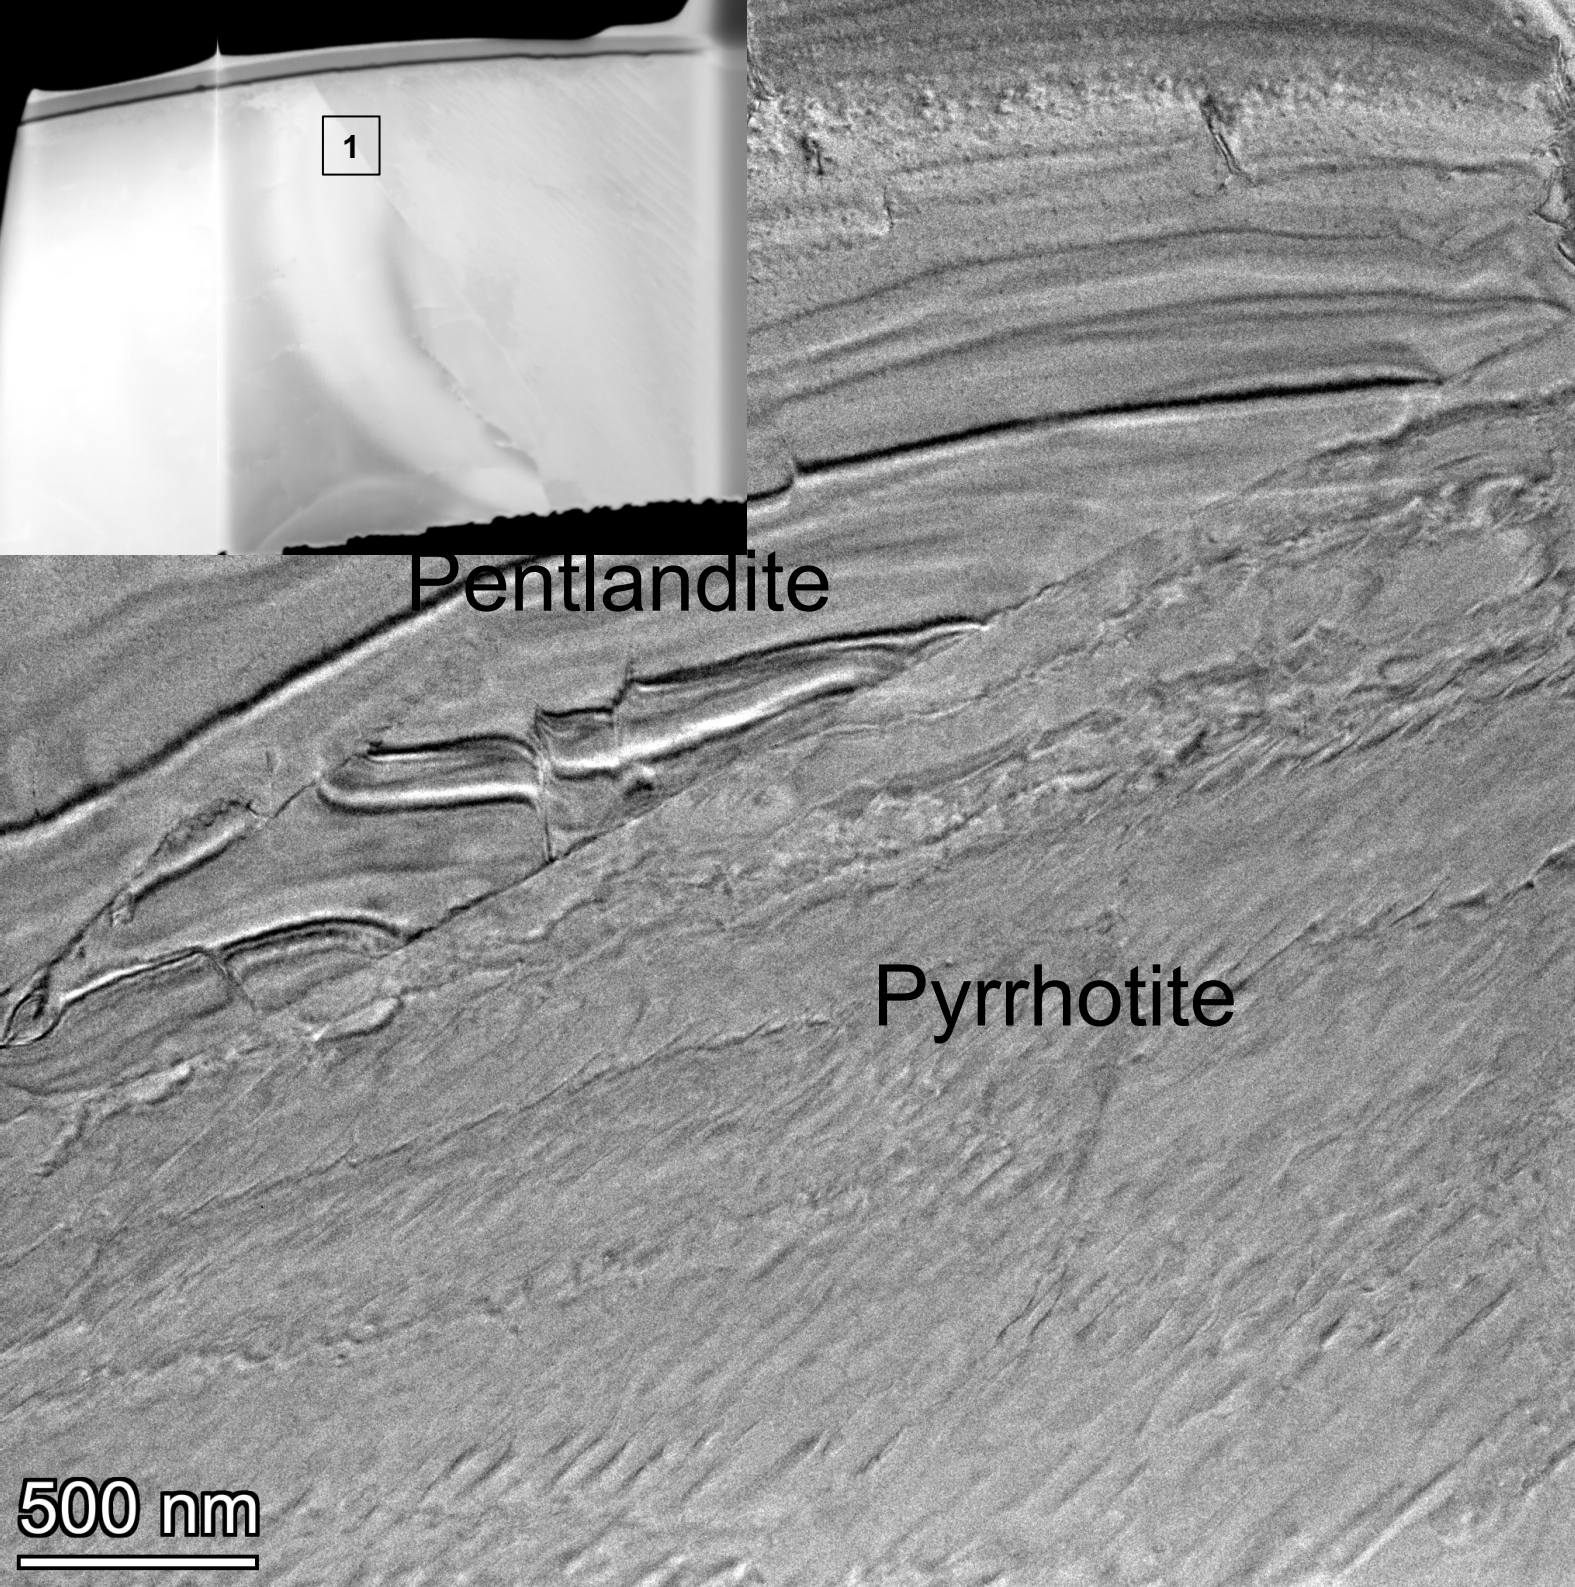

1

Pentlandite

Pyrrhotite

500 nm



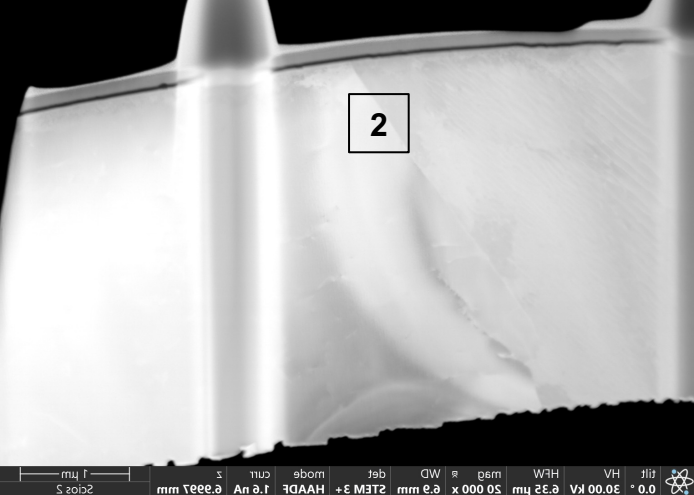

Pentlandite

Pyrrhotite

20 nm

5 nm<sup>-1</sup>

Pentlandite (FeNi)<sub>9</sub>S<sub>8</sub> (cubic; Fm3m)

| Spot# | d-Spacing (nm) | (hkl) | Ideal d-Spacing (Å) |
|-------|----------------|-------|---------------------|
| 1     | 0.298055       | (222) | 2.9269-2.9458       |
| 2     | 0.304621       | (311) | 3.0570-3.0768       |
| 3     | 0.305403       | (311) | 3.0570-3.0768       |
| 4     | 0.291302       | (222) | 2.9269-2.9458       |
| 5     | 0.355458       | (220) | 3.5847-3.6078       |
| 6     | 0.357288       | (220) | 3.5847-3.6078       |
| 7     | 0.208034       | (422) | 2.0696-2.0830       |
| 8     | 0.208580.      | (422) | 2.0696-2.0830       |
| 9     | 0.177867       | (440) | 1.7923-1.8039       |





Pentlandite

Pyrrhotite

20 nm

5 nm<sup>-1</sup>

Pyrrhotite (Fe<sub>7</sub>S<sub>8</sub>) (monoclinic; C2/C; polytype 4C)  
Pentlandite (FeNi)<sub>9</sub>S<sub>8</sub> (cubic; Fm3m)

| Spot# | d-Spacing (nm) | (hkl)                | Ref. d-Spacing (Å) |
|-------|----------------|----------------------|--------------------|
| 1     | 0.514939       | (200) <sub>Pn</sub>  | 5.1023             |
| 2     | 0.484741       | (200) <sub>Pn</sub>  | 5.1023             |
| 3     | 0.472792       | (-112) <sub>Po</sub> | 4.7026             |
| 4     | 0.212368       | (204) <sub>Po</sub>  | 2.1246             |
| 5     | 0.209554       | (204) <sub>Po</sub>  | 2.1246             |
| 6     | 0.234879       | (312) <sub>Po</sub>  | 2.3457             |
| 7     | 0.147931       | (-627) <sub>Po</sub> | 1.4790             |
| 8     | 0.147887       | (-627) <sub>Po</sub> | 1.4790             |





Pentlandite

Pyrrhotite

20 nm

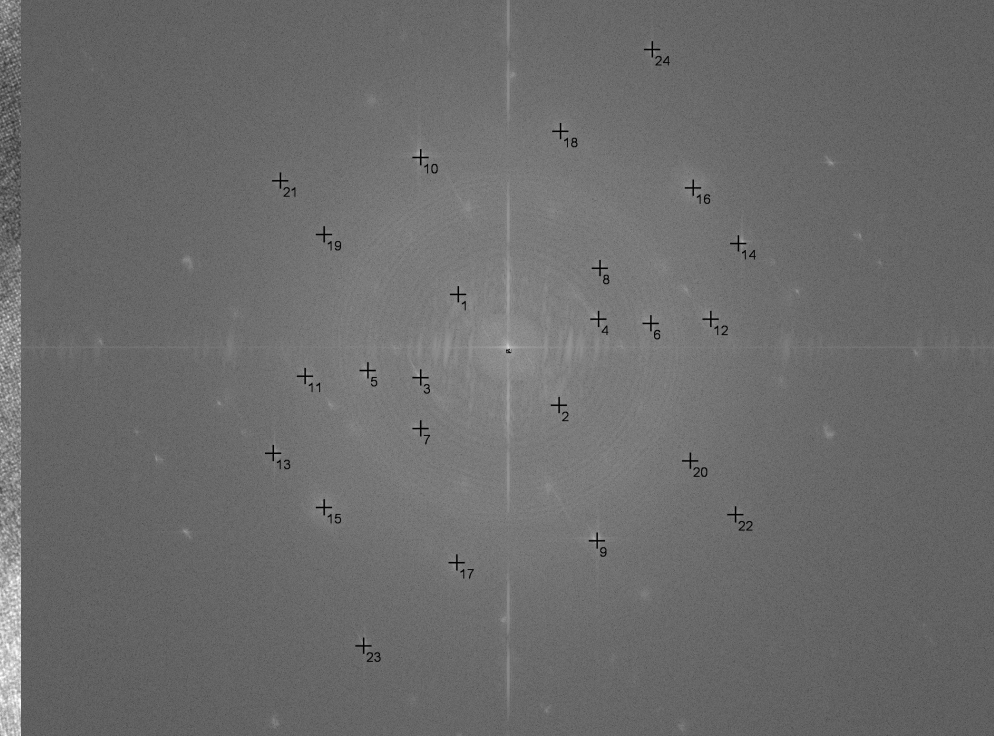

Pyrrhotite ( $\text{Fe}_7\text{S}_8$ ) (monoclinic;  $C2/C$ ; polytype 4C)

Pentlandite ( $\text{FeNi}_9\text{S}_8$ ) (cubic;  $\text{Fm}3\text{m}$ )

Bornite ( $\text{Cu}_5\text{FeS}_4$ ) (cubic;  $\text{F-}43\text{m}$ )

| Spot# | d-Spacing (nm) | (hkl)                | Ideal d-Spacing (Å) |
|-------|----------------|----------------------|---------------------|
| 1     | 0.601231       | (111) <sub>Pn</sub>  | 5.8538-5.8916       |
| 3     | 0.467591       | (-112) <sub>PO</sub> | 4.7026              |
| 4     | 0.46133        | (-112) <sub>PO</sub> | 4.7026              |
| 5     | 0.305823       | (311) <sub>Pn</sub>  | 3.0570-3.0768       |
| 7     | 0.362334       | (220) <sub>Pn</sub>  | 3.5847-3.6078       |
| 8     | 0.360398       | (220) <sub>Pn</sub>  | 3.5847-3.6078       |
| 9     | 0.203696       | (422) <sub>Pn</sub>  | 2.0696-2.0830       |
| 10    | 0.208398       | (422) <sub>Pn</sub>  | 2.0696-2.0830       |
| 11    | 0.212077       | (204) <sub>PO</sub>  | 2.1246              |
| 12    | 0.212845       | (204) <sub>PO</sub>  | 2.1246              |
| 19    | 0.201879       | (-133) <sub>Pn</sub> | 2.0215-2.0128       |
| 20    | 0.20247        | (-133) <sub>Pn</sub> | 2.0215-2.0128       |
| 23    | 0.13087        | (800) <sub>Bn</sub>  | 1.3375              |
| 24    | 0.131641       | (800) <sub>Bn</sub>  | 1.3375              |



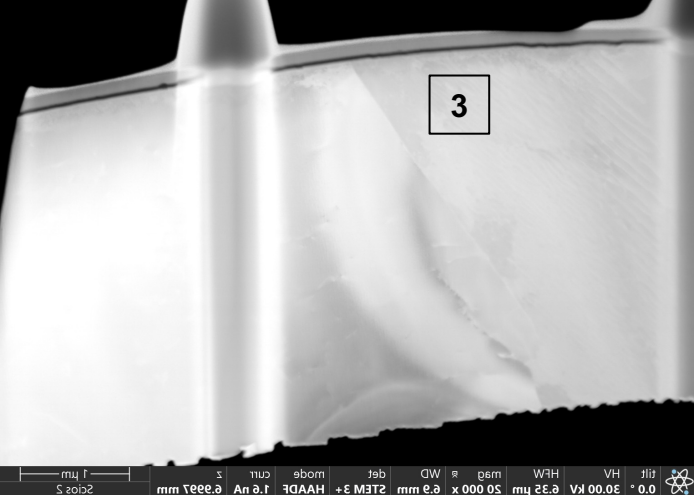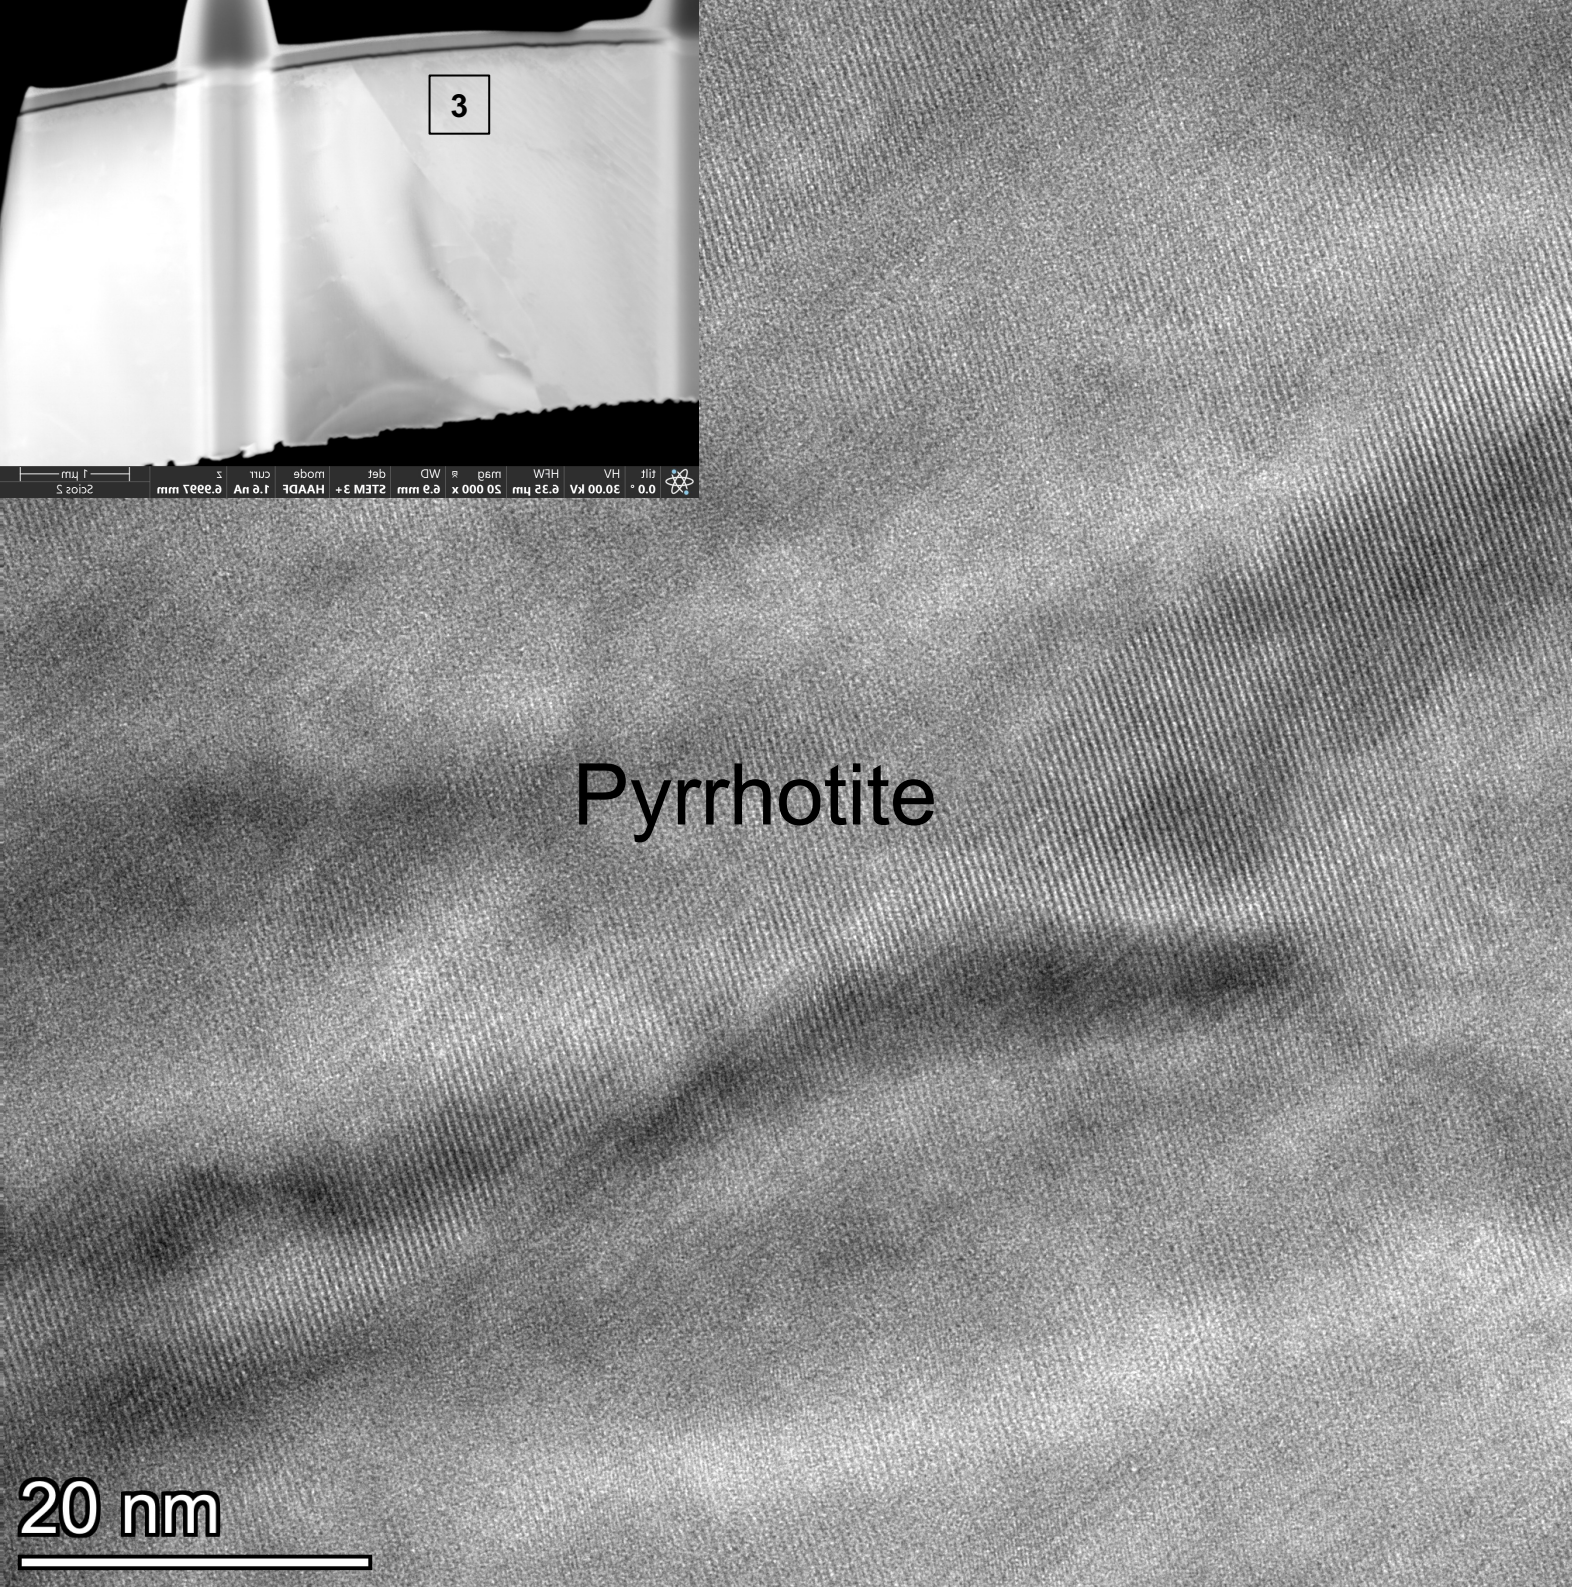

Pyrrhotite

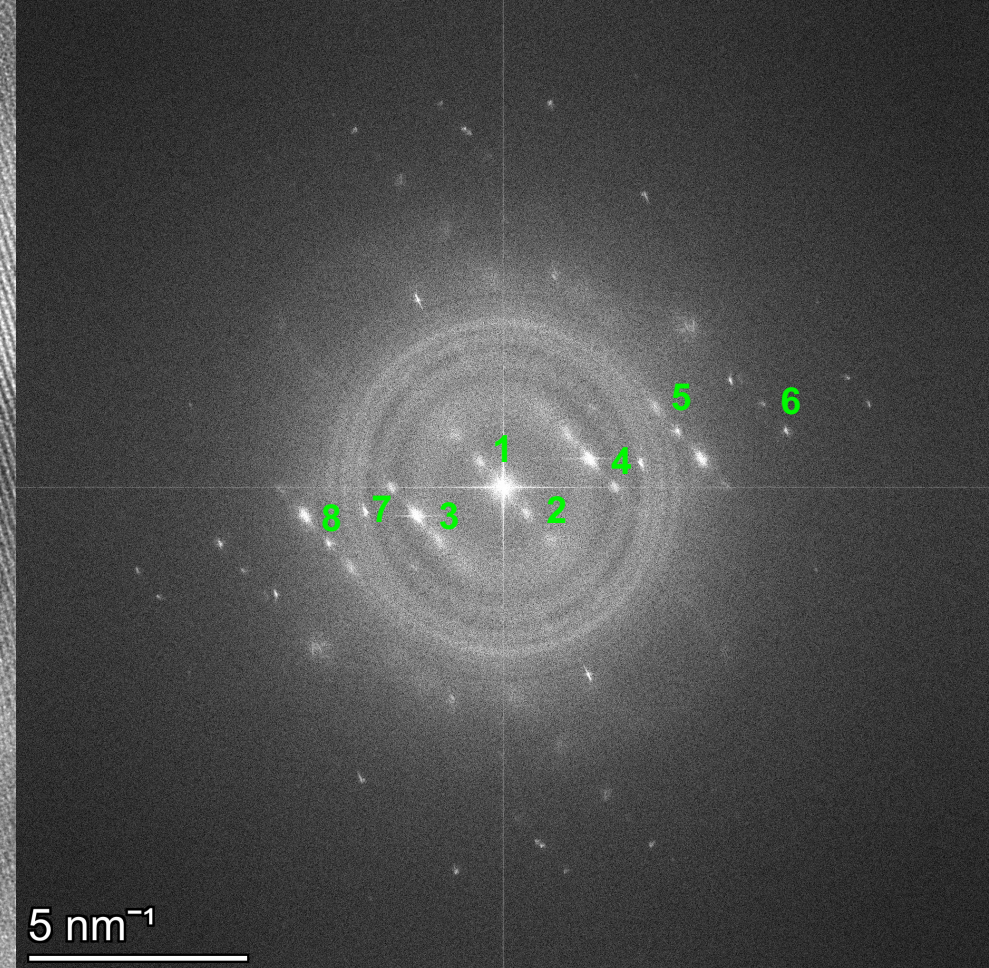

| Pyrrhotite (Fe <sub>7</sub> S <sub>8</sub> ) (monoclinic; C2/C; polytype 4C) |                |        |                    |
|------------------------------------------------------------------------------|----------------|--------|--------------------|
| Spot#                                                                        | d-Spacing (nm) | (hkl)  | Ref. d-Spacing (Å) |
| 1                                                                            | 1.231368       | {001}  | 12.8958            |
| 2                                                                            | 1.171447       | {001}  | 11.8656            |
| 3                                                                            | 0.46077        | (-112) | 4.6860-4.7026      |
| 4                                                                            | 0.47761        | (-112) | 4.6860-4.7026      |
| 5                                                                            | 0.530896       | (-202) | 5.3052             |
| 6                                                                            | 0.312805       | (-313) | 3.1336             |
| 7                                                                            | 0.308396       | (310)  | 3.1093             |
| 8                                                                            | 0.212871       | (204)  | 2.1246             |



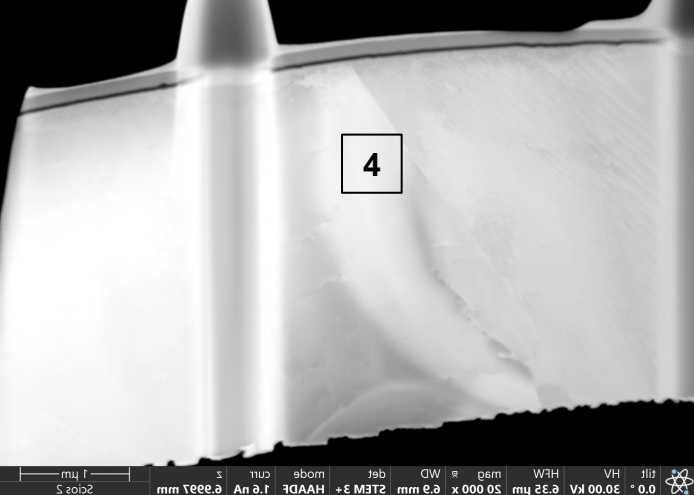

# Pentlandite

20 nm

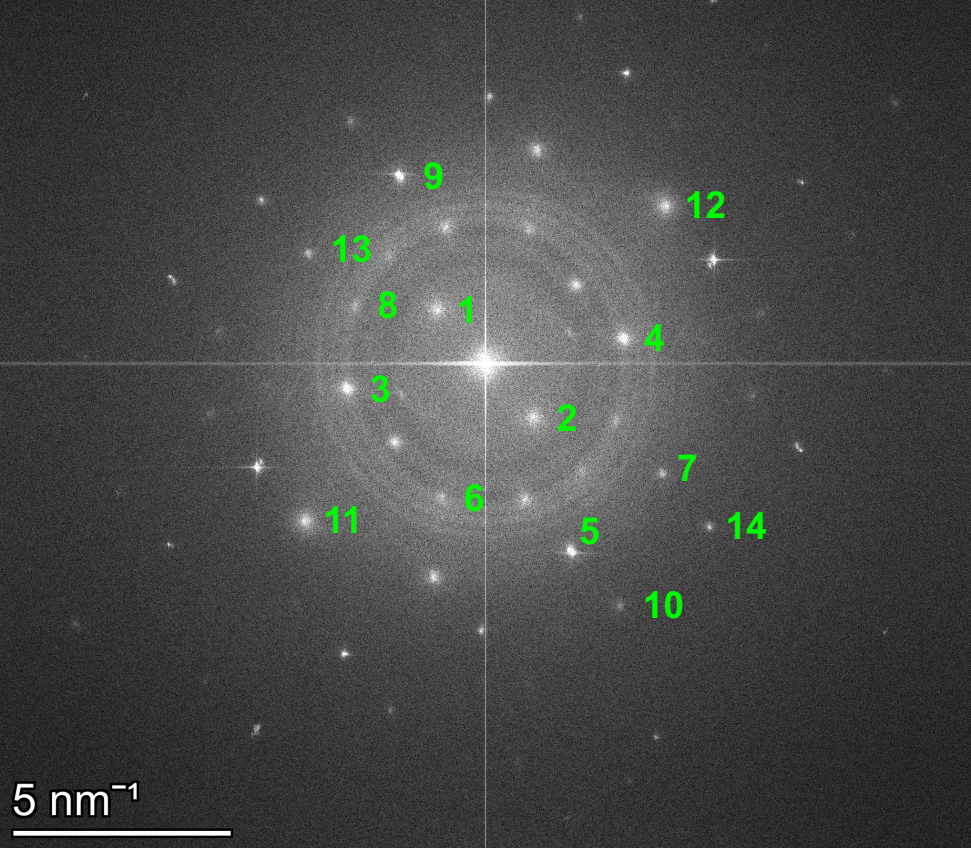

| Pentlandite (FeNi) <sub>9</sub> S <sub>8</sub> (cubic; Fm3m) |                |       |                     |
|--------------------------------------------------------------|----------------|-------|---------------------|
| Spot#                                                        | d-Spacing (nm) | (hkl) | Ideal d-Spacing (Å) |
| 1                                                            | 0.594419       | (111) | 5.8538-5.8916       |
| 2                                                            | 0.569116       | (111) | 5.8538-5.8916       |
| 3                                                            | 0.305972       | (311) | 3.0570-3.0768       |
| 4                                                            | 0.304598       | (311) | 3.0570-3.0768       |
| 5                                                            | 0.29855        | (222) | 2.9269-2.9458       |
| 6                                                            | 0.299393       | (222) | 2.9269-2.9458       |
| 7                                                            | 0.305389       | (311) | 3.0570-3.0768       |
| 8                                                            | 0.308573       | (311) | 3.0570-3.0768       |
| 9                                                            | 0.209475       | (422) | 2.0696-2.0830       |
| 10                                                           | 0.206015       | (422) | 2.0696-2.0830       |
| 11                                                           | 0.179149       | (440) | 1.7923-1.8039       |
| 12                                                           | 0.182742       | (440) | 1.7923-1.8039       |
| 13                                                           | 0.209096       | (422) | 2.0696-2.0830       |
| 14                                                           | 0.209247       | (422) | 2.0696-2.0830       |



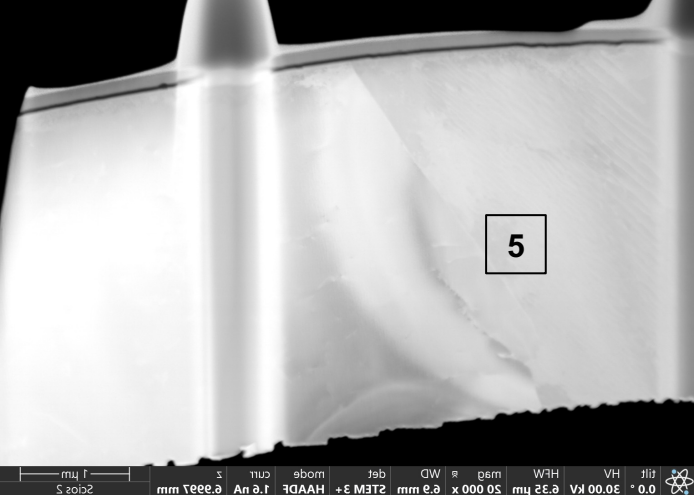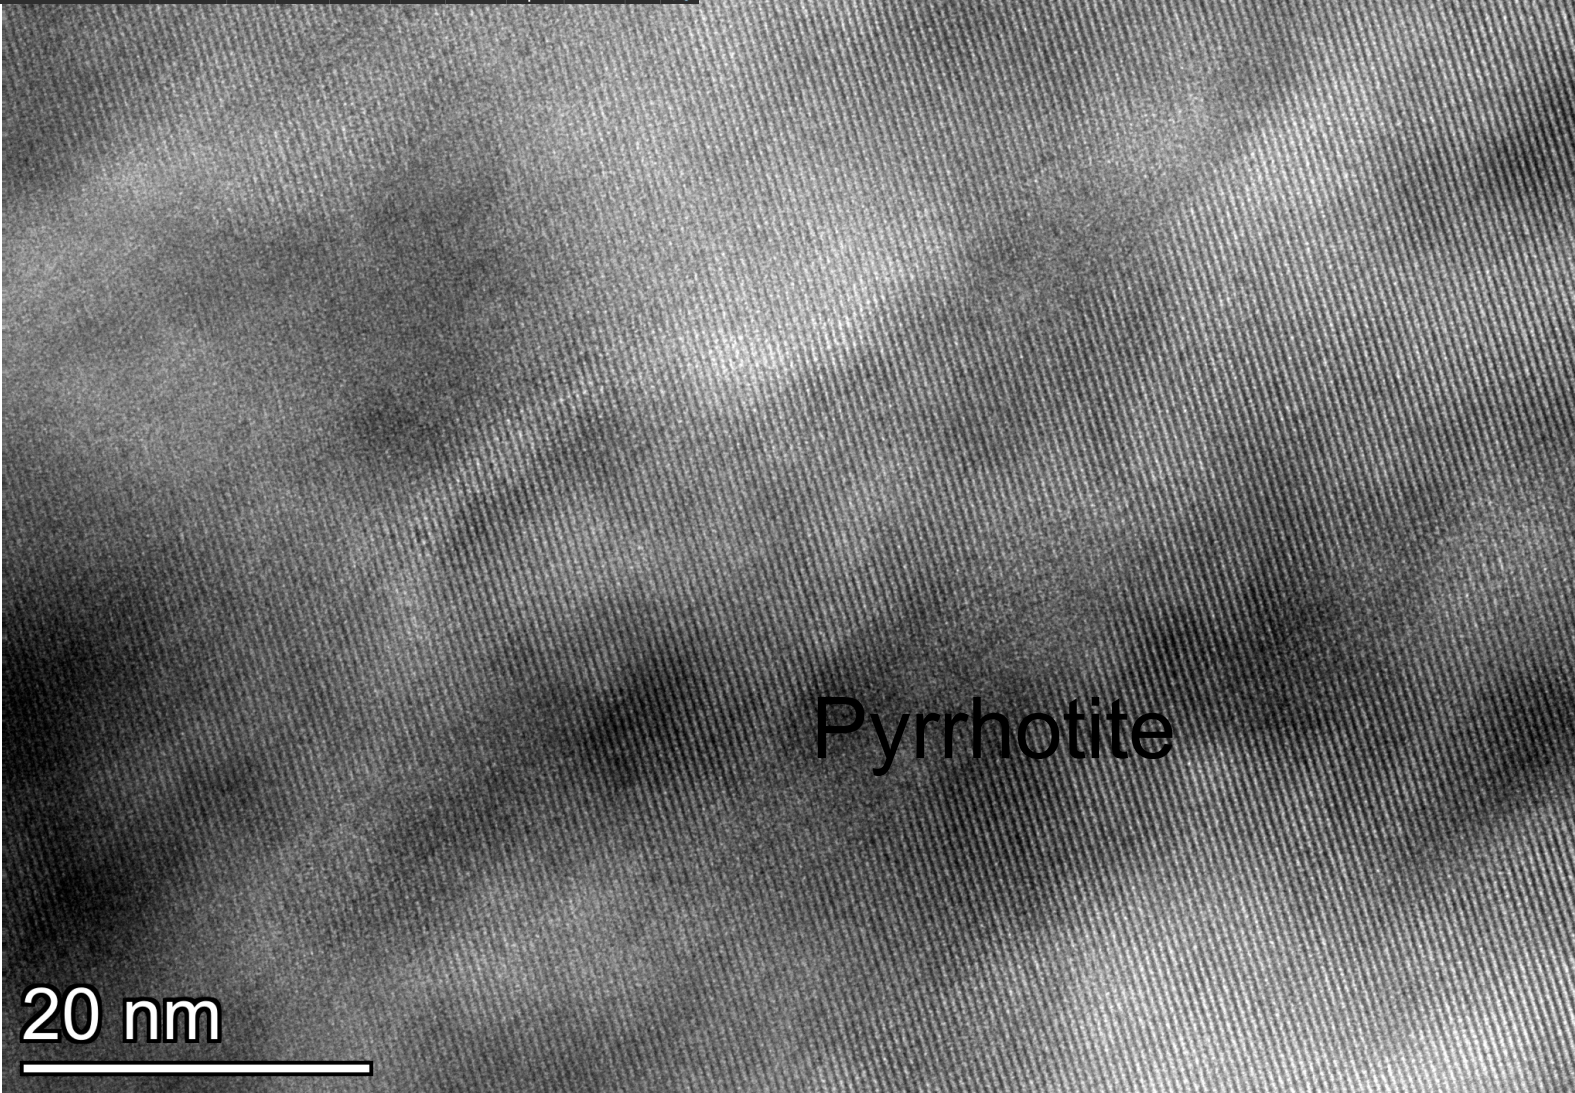

Pyrrhotite

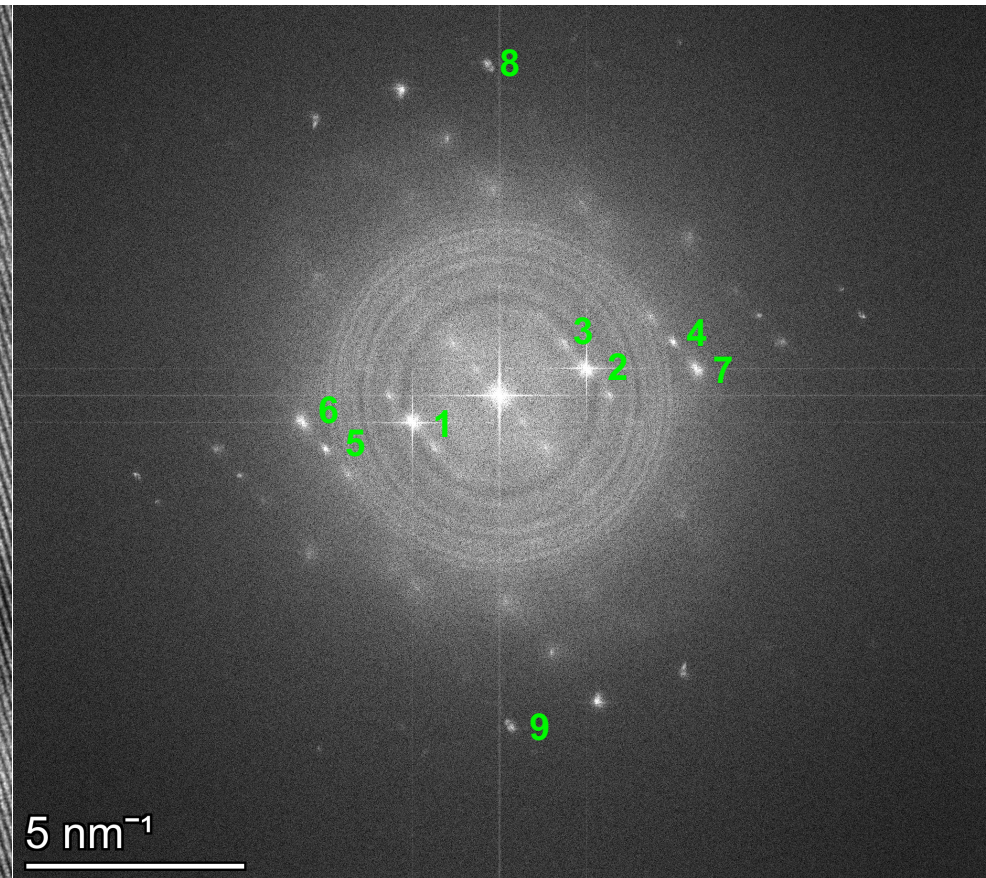

| Pyrrhotite (Fe <sub>7</sub> S <sub>8</sub> ) (monoclinic; C2/C; polytype 4C) |                |                      |                    |
|------------------------------------------------------------------------------|----------------|----------------------|--------------------|
| Chalcopyrite (CuFeS <sub>2</sub> ) (tetragonal; I42d)                        |                |                      |                    |
| Spot#                                                                        | d-Spacing (nm) | (hkl)                | Ref. d-Spacing (Å) |
| 1                                                                            | 0.471036       | (-112) <sub>Po</sub> | 4.7026             |
| 2                                                                            | 0.480821       | (-112) <sub>Po</sub> | 4.7026             |
| 3                                                                            | 0.530071       | (-202) <sub>Po</sub> | 5.3052             |
| 4                                                                            | 0.240795       | (-315) <sub>Po</sub> | 2.3702-2.3767      |
| 5                                                                            | 0.237625       | (-315) <sub>Po</sub> | 2.3702-2.3767      |
| 6                                                                            | 0.220301       | (-421) <sub>Po</sub> | 2.1959-2.2076      |
| 7                                                                            | 0.218549       | (-421) <sub>Po</sub> | 2.1959-2.2076      |
| 8                                                                            | 0.131675       | (008) <sub>Cp</sub>  | 1.3024-1.3027      |
| 9                                                                            | 0.130936       | (008) <sub>Cp</sub>  | 1.3024-1.3027      |



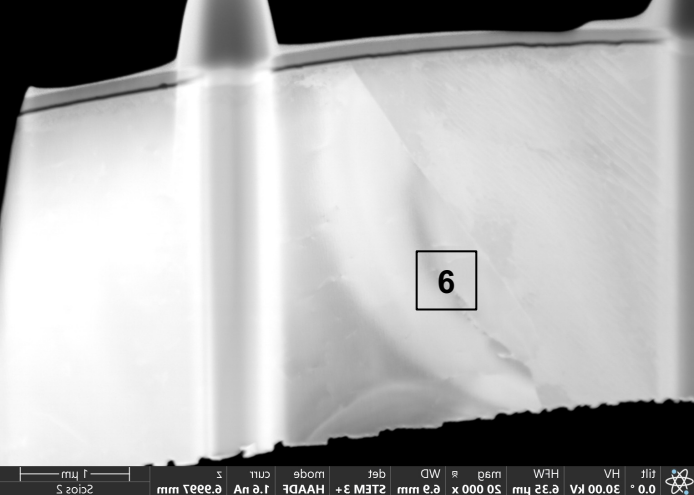

Pentlandite

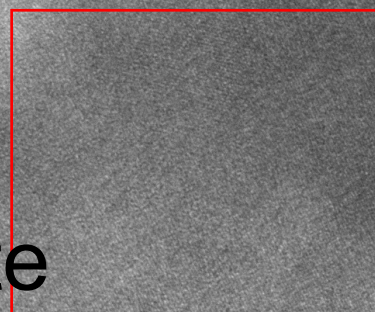

Pyrrhotite

20 nm

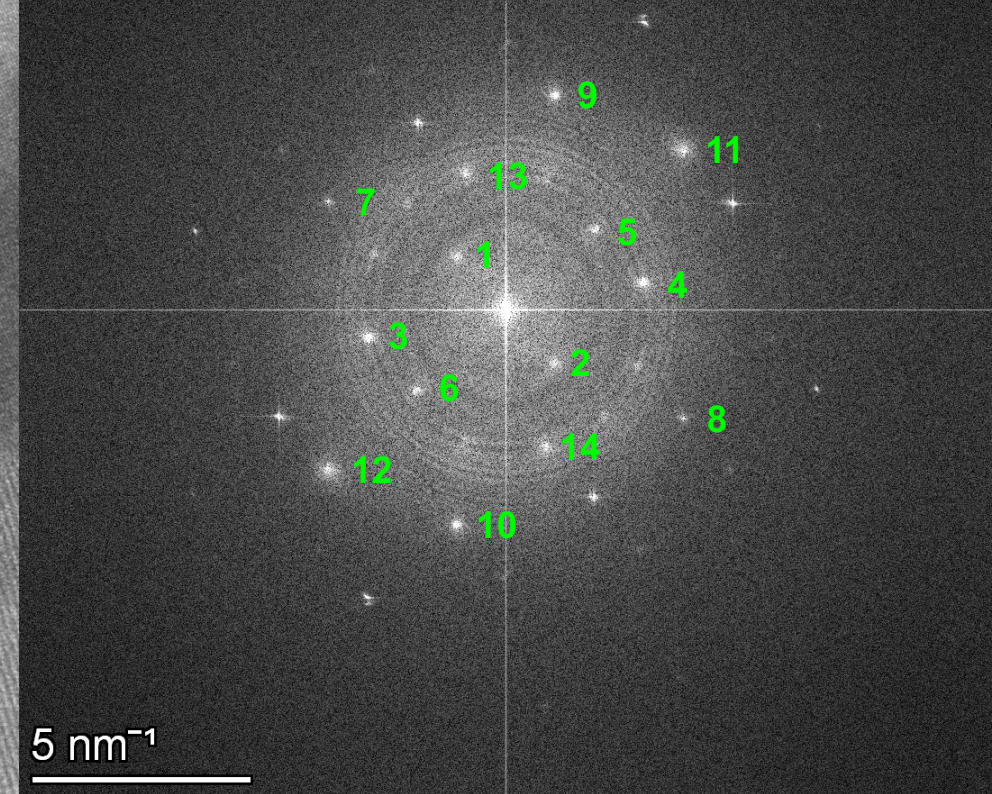

| Pentlandite (FeNi) <sub>9</sub> S <sub>8</sub> (cubic; Fm3m)           |                |                     |                     |
|------------------------------------------------------------------------|----------------|---------------------|---------------------|
| Chalcopyrite (CuFeS <sub>2</sub> ) (tetragonal; <i>I</i> 42 <i>d</i> ) |                |                     |                     |
| Spot#                                                                  | d-Spacing (nm) | (hkl)               | Ideal d-Spacing (Å) |
| 1                                                                      | 0.602232       | (111)               | 5.8538-5.8916       |
| 2                                                                      | 0.581329       | (111)               | 5.8538-5.8916       |
| 3                                                                      | 0.304694       | (112) <sub>Cp</sub> | 3.0385-3.0387       |
| 4                                                                      | 0.303621       | (112) <sub>Cp</sub> | 3.0385-3.0387       |
| 5                                                                      | 0.365277       | (220)               | 3.5847-3.6078       |
| 6                                                                      | 0.347047       | (220)               | 3.5847-3.6078       |
| 7                                                                      | 0.209806       | (422)               | 2.0696-2.0830       |
| 8                                                                      | 0.20995        | (422)               | 2.0696-2.0830       |
| 9                                                                      | 0.199718       | (333)               | 1.9513-1.9639       |
| 10                                                                     | 0.194856       | (333)               | 1.9513-1.9639       |
| 11                                                                     | 0.185201       | (204) <sub>Cp</sub> | 1.8365-1.8561       |
| 12                                                                     | 0.183313       | (204) <sub>Cp</sub> | 1.8365-1.8561       |
| 13                                                                     | 0.29789        | (222)               | 2.9269-2.9458       |
| 14                                                                     | 0.29249        | (222)               | 2.9269-2.9458       |



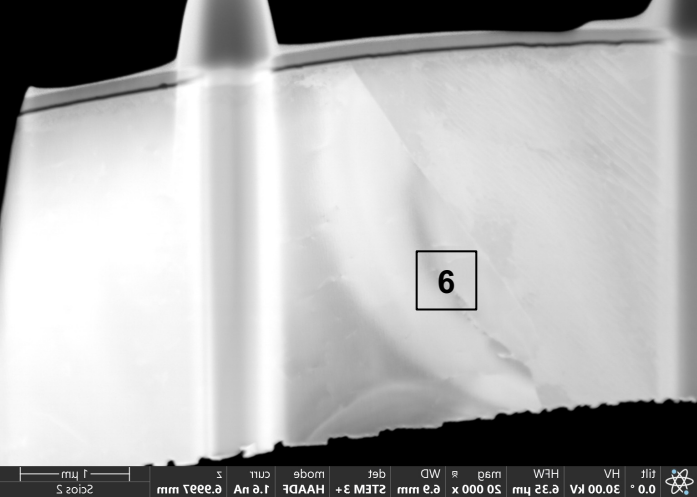

Pentlandite

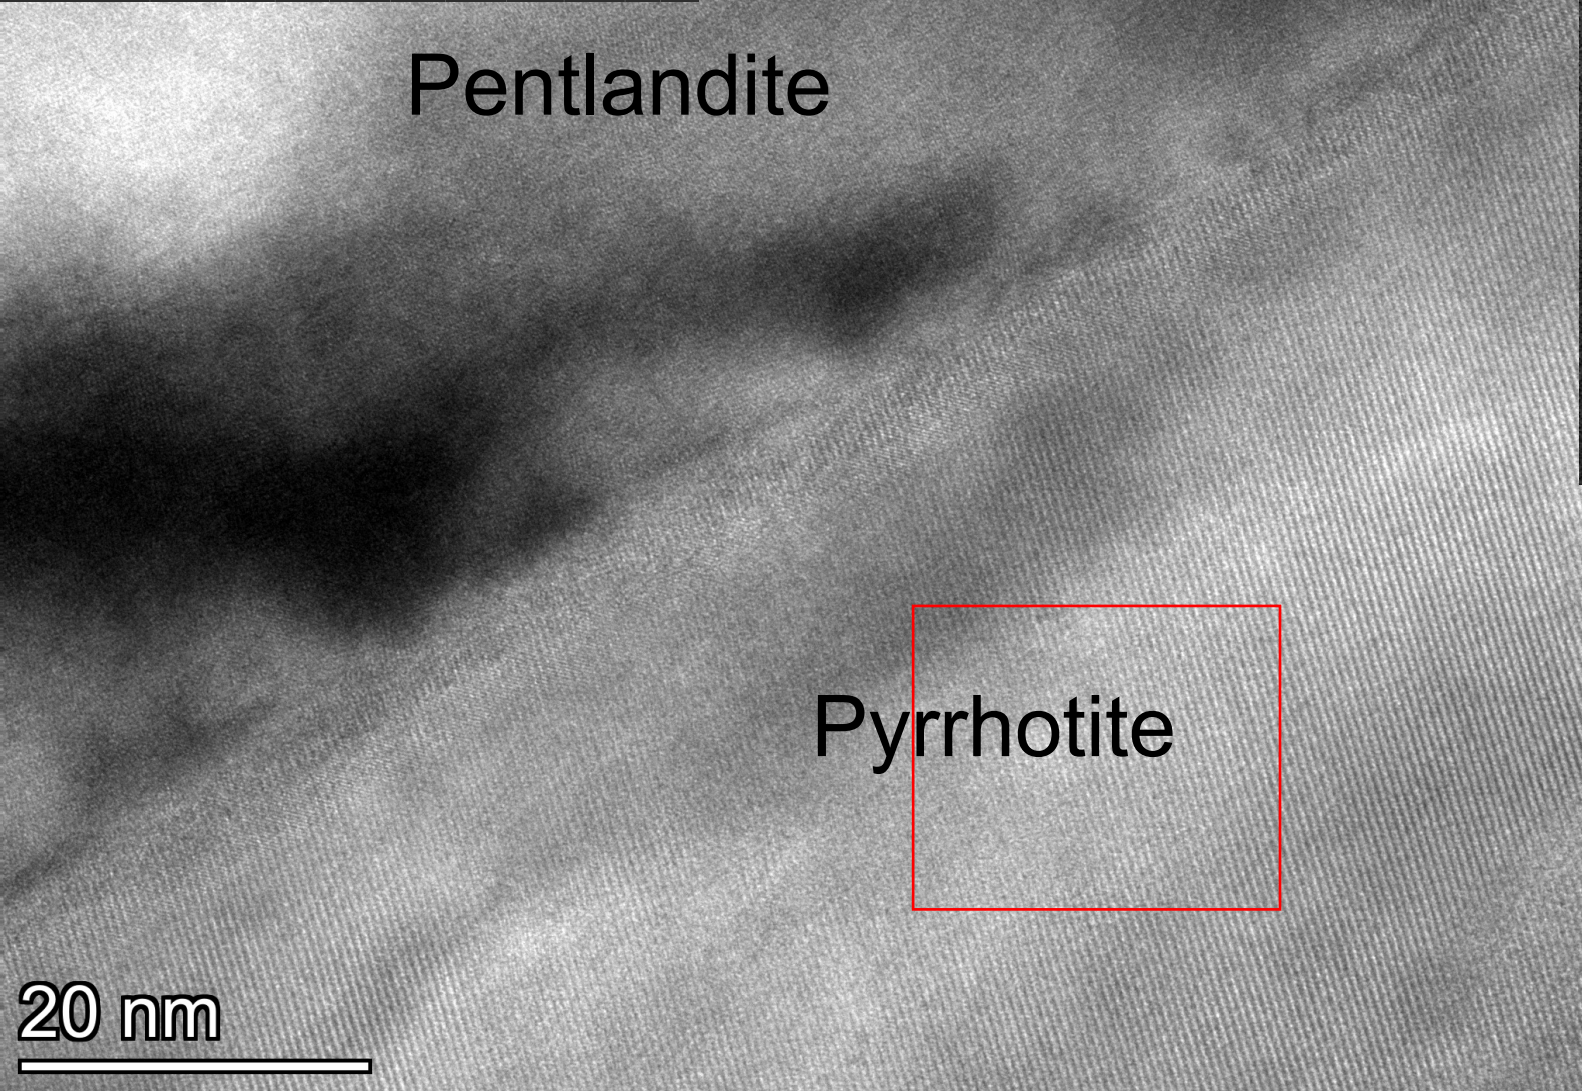

Pyrrhotite

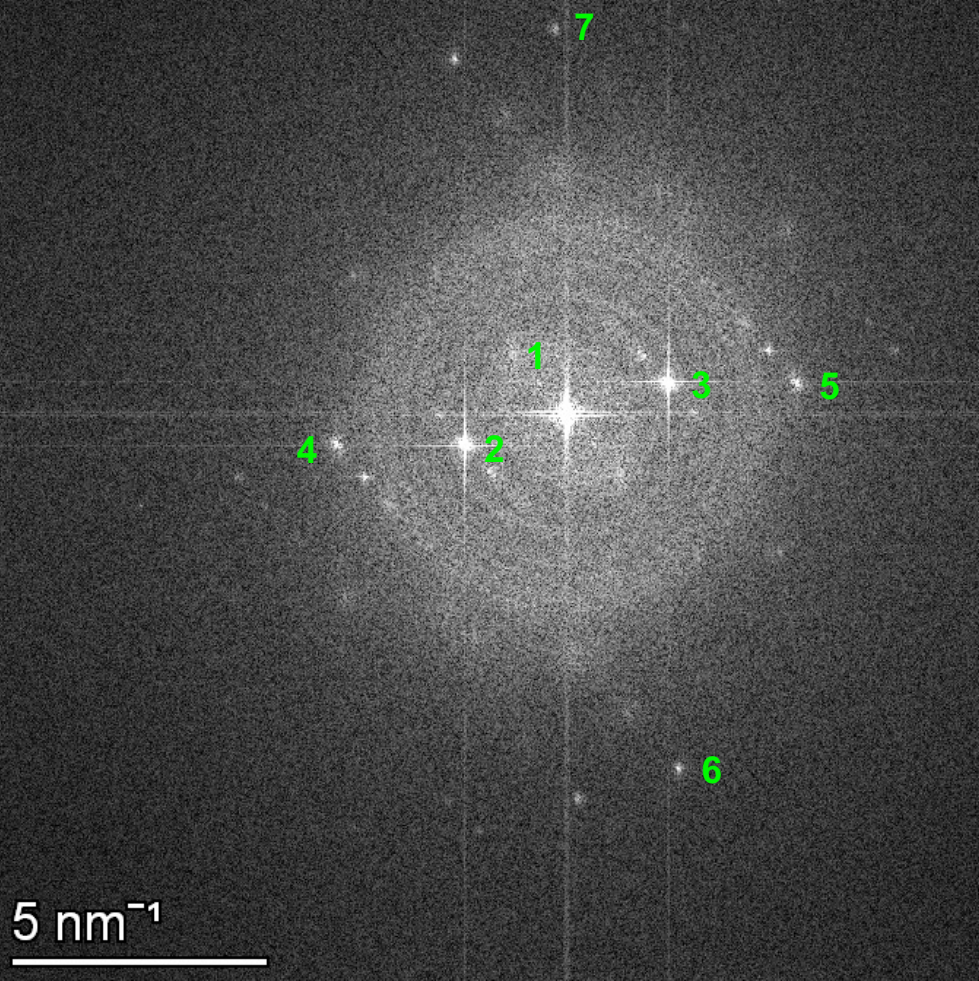

|                                                                              |                |                     |                    |
|------------------------------------------------------------------------------|----------------|---------------------|--------------------|
| Pyrrhotite (Fe <sub>7</sub> S <sub>8</sub> ) (monoclinic; C2/C; polytype 4C) |                |                     |                    |
| Pentlandite (FeNi) <sub>9</sub> S <sub>8</sub> (cubic; Fm3m)                 |                |                     |                    |
| Bornite (Cu <sub>5</sub> FeS <sub>4</sub> ) (cubic; F4̄3m)                   |                |                     |                    |
| Spot#                                                                        | d-Spacing (nm) | (hkl)               | Ref. d-Spacing (Å) |
| 1                                                                            | 0.602232       | (111) <sub>Pn</sub> | 5.8538-5.8916      |
| 2                                                                            | 0.47309        | (-112)              | 4.7026             |
| 3                                                                            | 0.485556       | (-112)              | 4.7026             |
| 4                                                                            | 0.219033       | (-421)              | 2.1959-2.2076      |
| 5                                                                            | 0.221832       | (-421)              | 2.1959-2.2076      |
| 6                                                                            | 0.134774       | (800) <sub>Bn</sub> | 1.3375             |
| 7                                                                            | 0.133779       | (800) <sub>Bn</sub> | 1.3375             |





Pentlandite

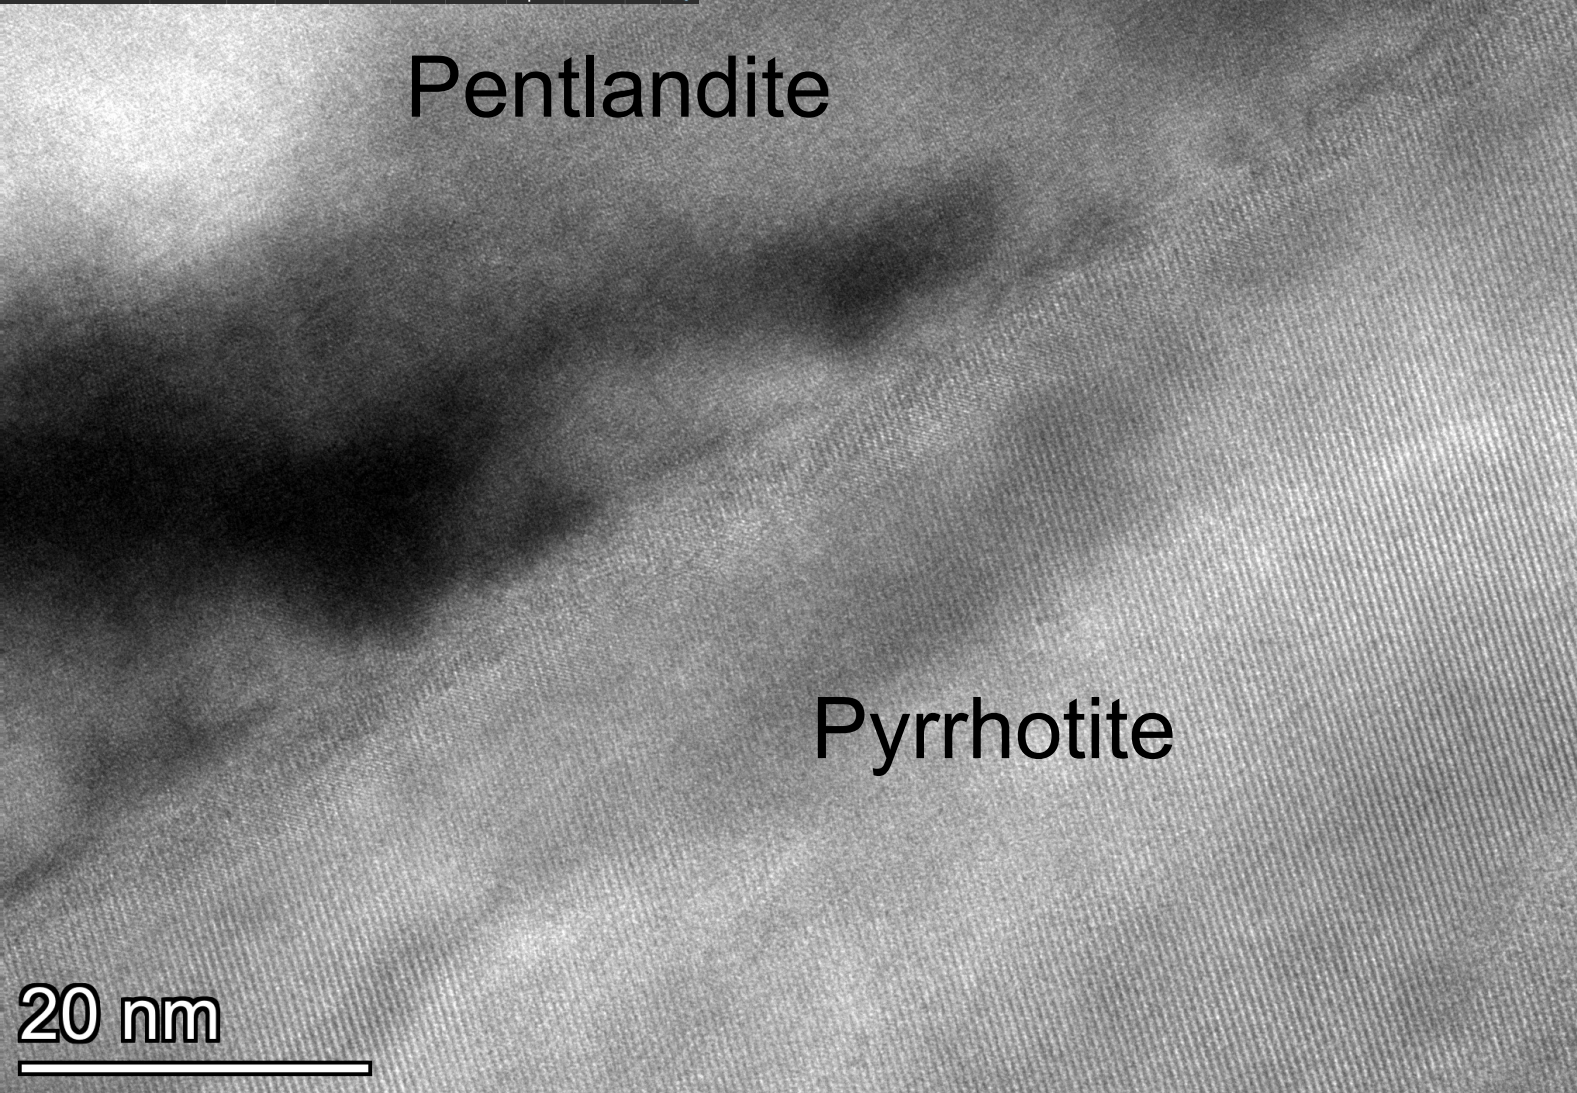

Pyrrhotite

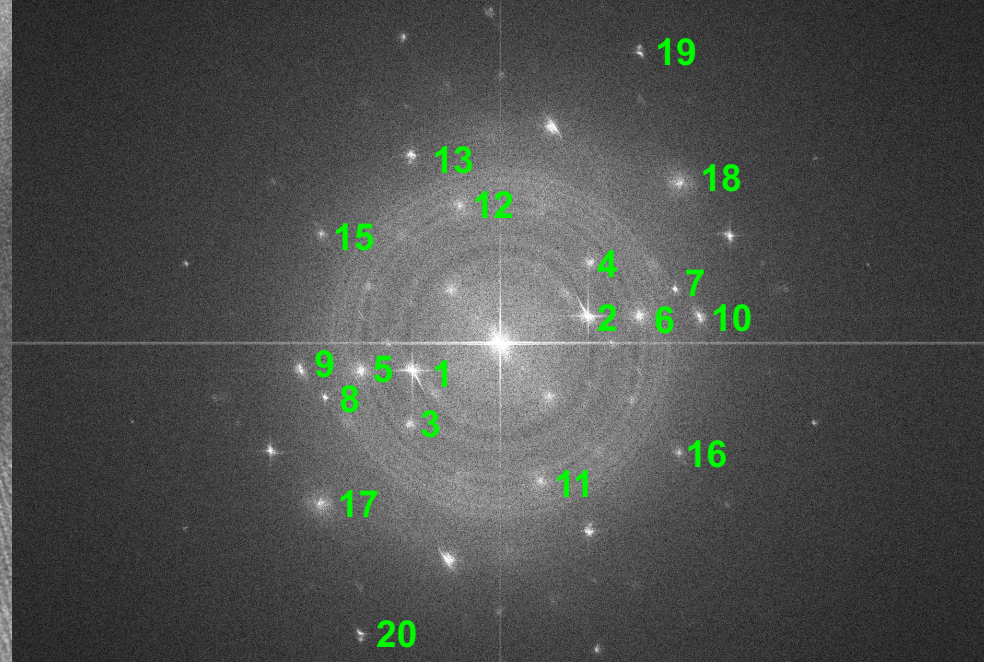

Pyrrhotite ( $\text{Fe}_7\text{S}_8$ ) (monoclinic;  $C2/C$ ; polytype 4C)

Pentlandite ( $\text{FeNi}_9\text{S}_8$ ) (cubic;  $Fm\bar{3}m$ )

Bornite ( $\text{Cu}_5\text{FeS}_4$ ) (cubic;  $F\bar{4}3m$ )

| Spot# | d-Spacing (nm) | (hkl)                                 | Ref. d-Spacing (Å) |
|-------|----------------|---------------------------------------|--------------------|
| 1     | 0.473165       | $(-112)_{\text{Po}}$                  | 4.7026             |
| 2     | 0.47761        | $(-112)_{\text{Po}}$                  | 4.7026             |
| 3     | 0.361694       | $(220)_{\text{Pn}}$                   | 3.5847-3.6078      |
| 4     | 0.35476        | $(220)_{\text{Pn}}$                   | 3.5847-3.6078      |
| 5     | 0.304133       | $(112)_{\text{Cp}}$                   | 3.0385-3.0387      |
| 6     | 0.30286        | $(112)_{\text{Cp}}$                   | 3.0385-3.0387      |
| 7     | 0.236065       | $(331)_{\text{Pn}}/(312)_{\text{Po}}$ | 2.3411/2.3457      |
| 8     | 0.236532       | $(331)_{\text{Pn}}/(312)_{\text{Po}}$ | 2.3411/2.3457      |
| 9     | 0.218667       | $(-421)_{\text{Po}}$                  | 2.1959-2.2076      |
| 10    | 0.217234       | $(-421)_{\text{Po}}$                  | 2.1959-2.2076      |
| 11    | 0.307591       | $(112)_{\text{Cp}}$                   | 3.0385-3.0387      |
| 12    | 0.303482       | $(112)_{\text{Cp}}$                   | 3.0385-3.0387      |
| 13    | 0.209727       | $(422)_{\text{Pn}}$                   | 2.0830             |
| 14    | 0.209566       | $(422)_{\text{Pn}}$                   | 2.0830             |
| 15    | 0.20767        | $(422)_{\text{Pn}}$                   | 2.0830             |
| 16    | 0.207081       | $(422)_{\text{Pn}}$                   | 2.0830             |
| 17    | 0.1812         | $(440)_{\text{Pn}}$                   | 1.8039             |
| 18    | 0.183285       | $(440)_{\text{Pn}}$                   | 1.8039             |
| 19    | 0.135658       | $(800)_{\text{Bn}}$                   | 1.3375             |
| 20    | 0.134553       | $(800)_{\text{Bn}}$                   | 1.3375             |
