# Supplementary material for: Sulfide mineralogy of igneous basic rocks (ophites) from the external zone of the Betic Cordillera
Source: Copernicus journal article supplement (doi:10.5194/ejm-37-191-2025), 2025-03-20
Supplement: Supplementary file 2 [file ejm-37-191-2025-supplement.zip]

**Sulfide mineralogy of igneous basic rocks (ophites) from the External Zone of the Betic Cordillera**

José M. González-Jiménez, Idael F. Blanco-Quintero, Lola Yesares, Claudio Marchesi, Amira R. Ferreira,  
Igor González-Pérez, Erwin Schettino, Fernando Gervilla

**Supplementary Information File S6**

**Nanostructural analysis of post-magmatic sulfides**

PEÑA ARPADA (PA-21-3)

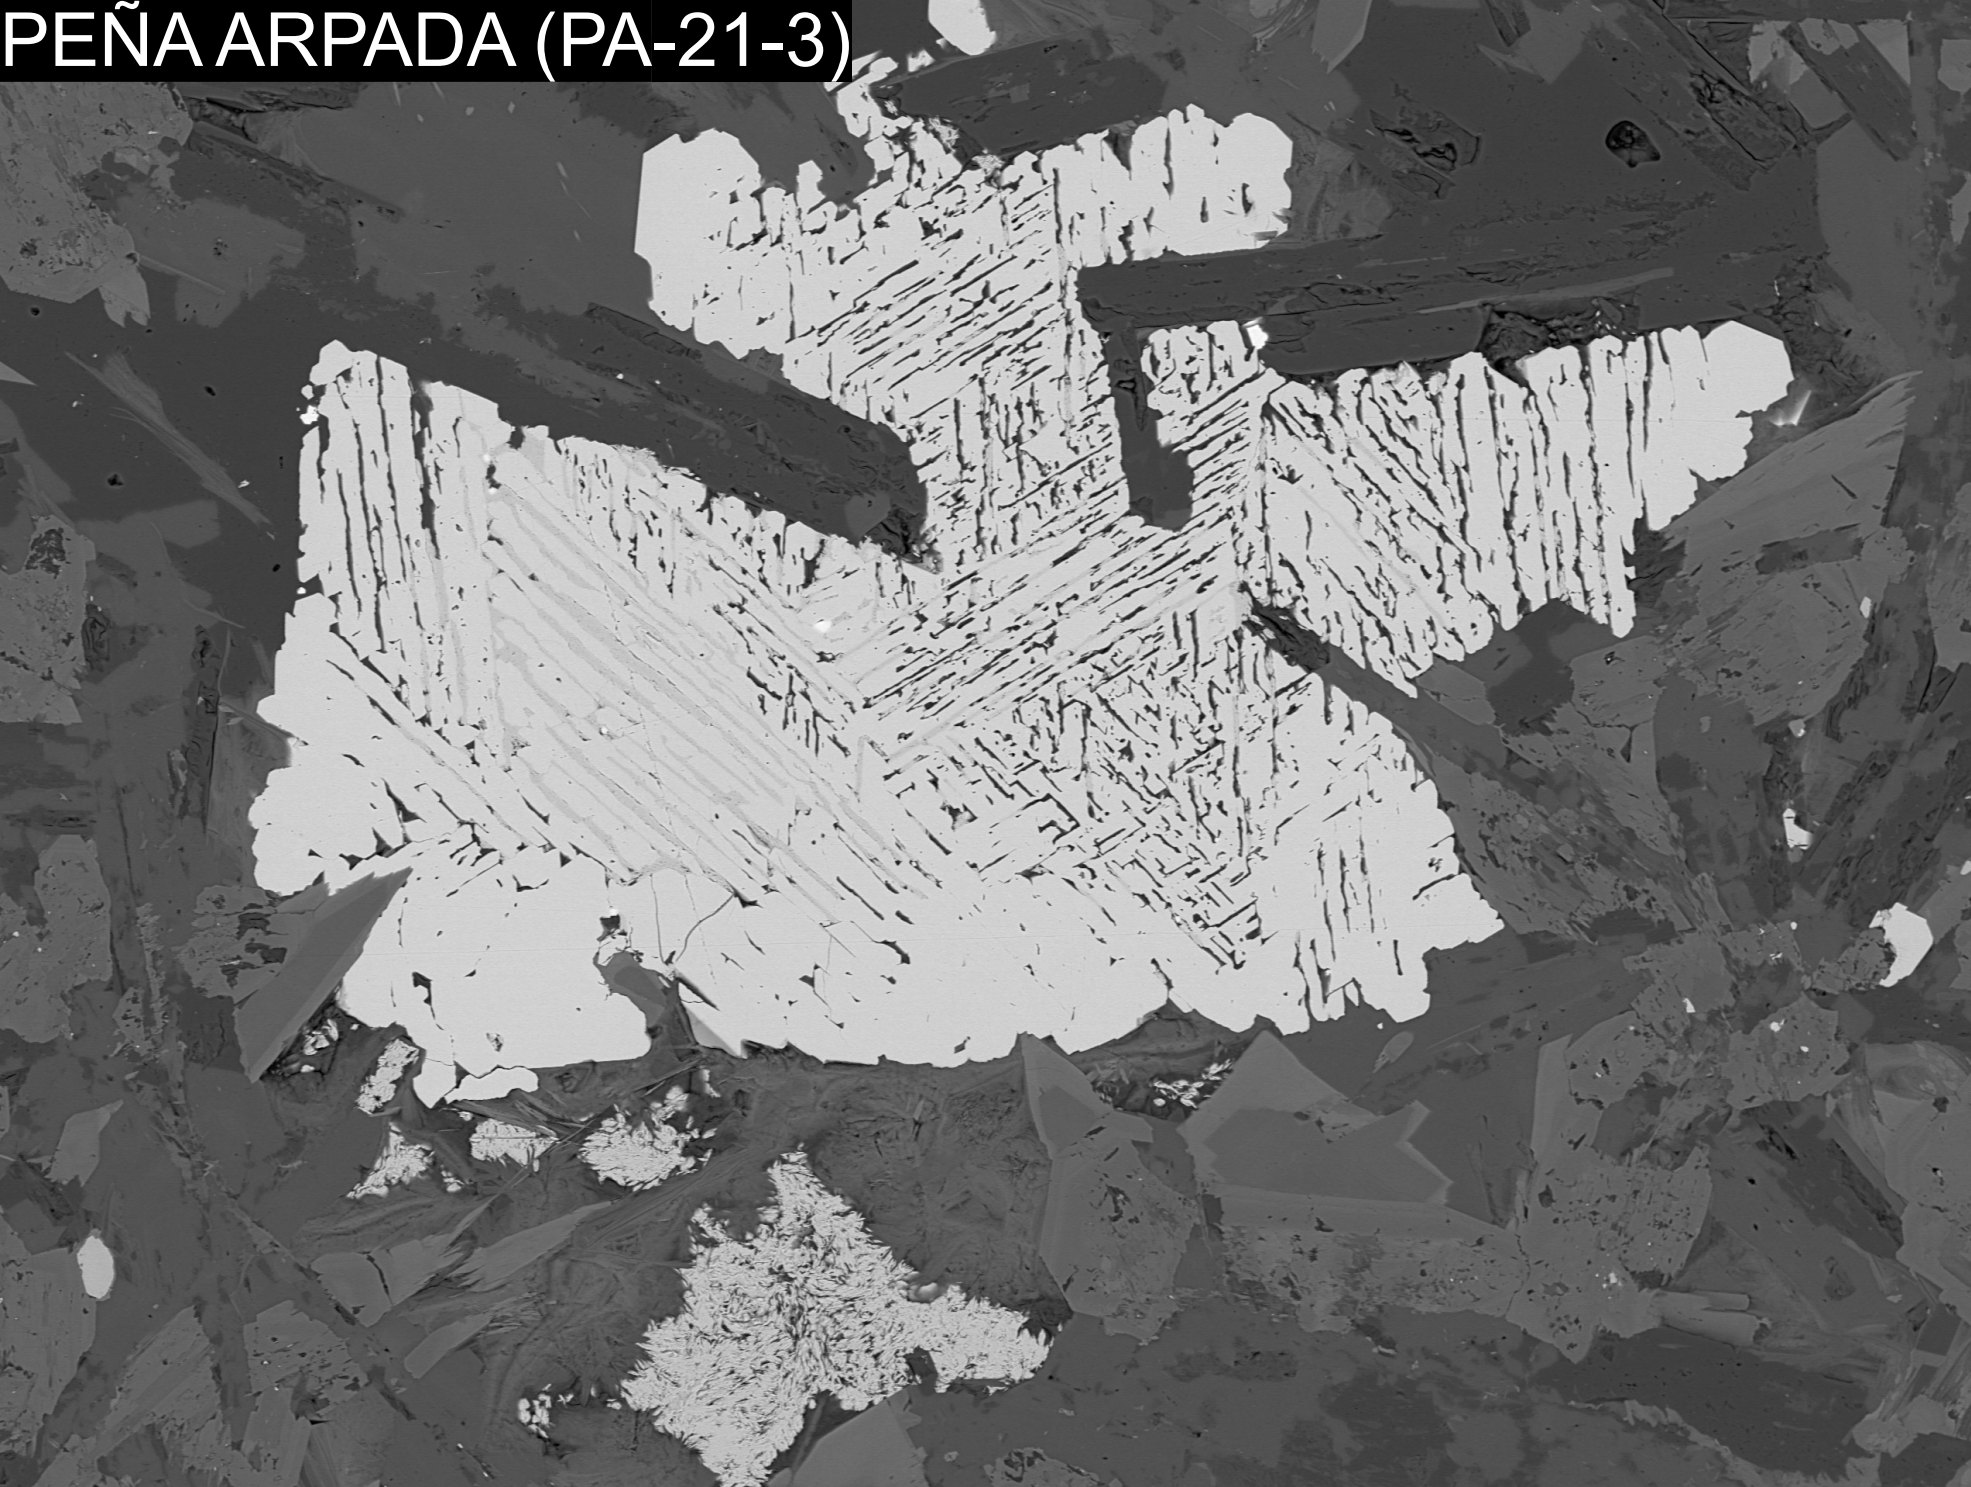

BED-C 15.0 kV WD 9.8 mm Std.-PC 80.0 HighVac.  x230

NOR 0517 July 13 2023

 100  $\mu\text{m}$



# PEÑA ARPADA (PA-21-3) THIN-FOIL #1

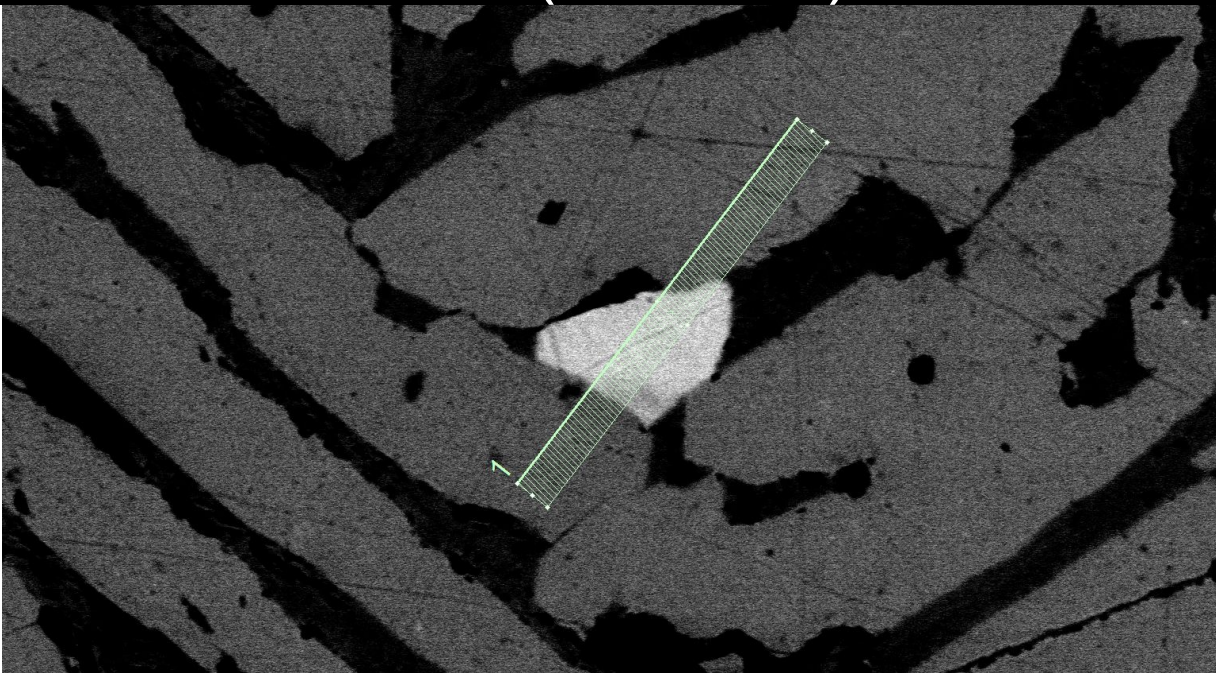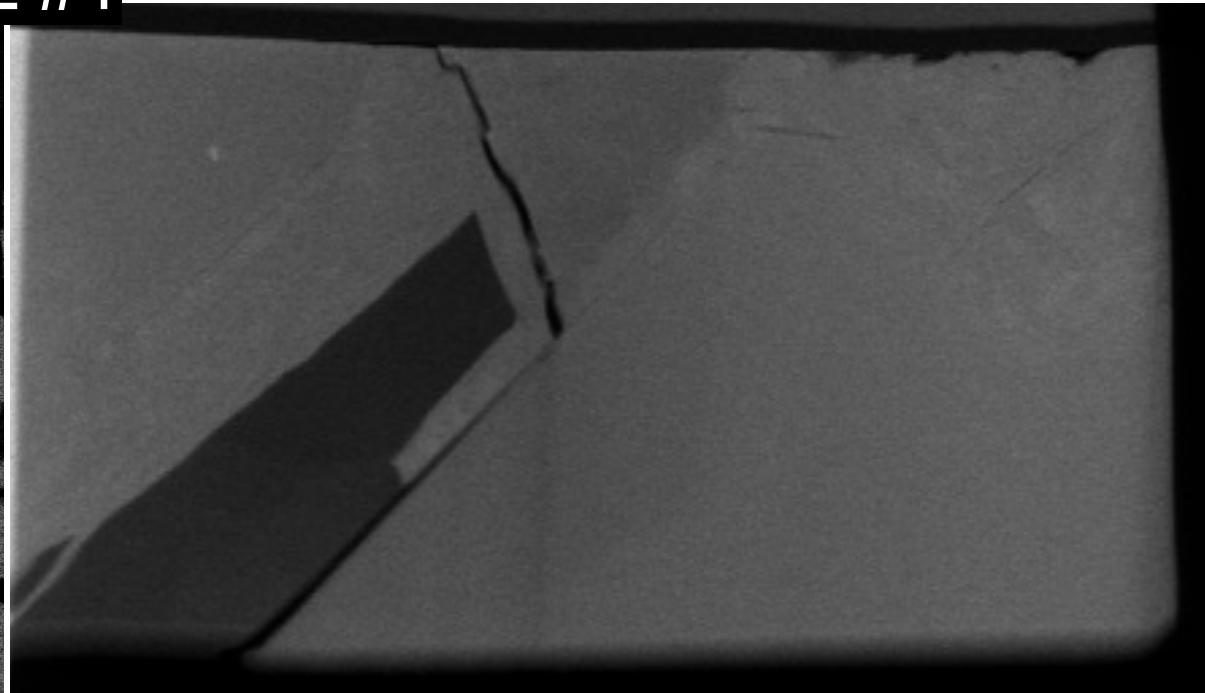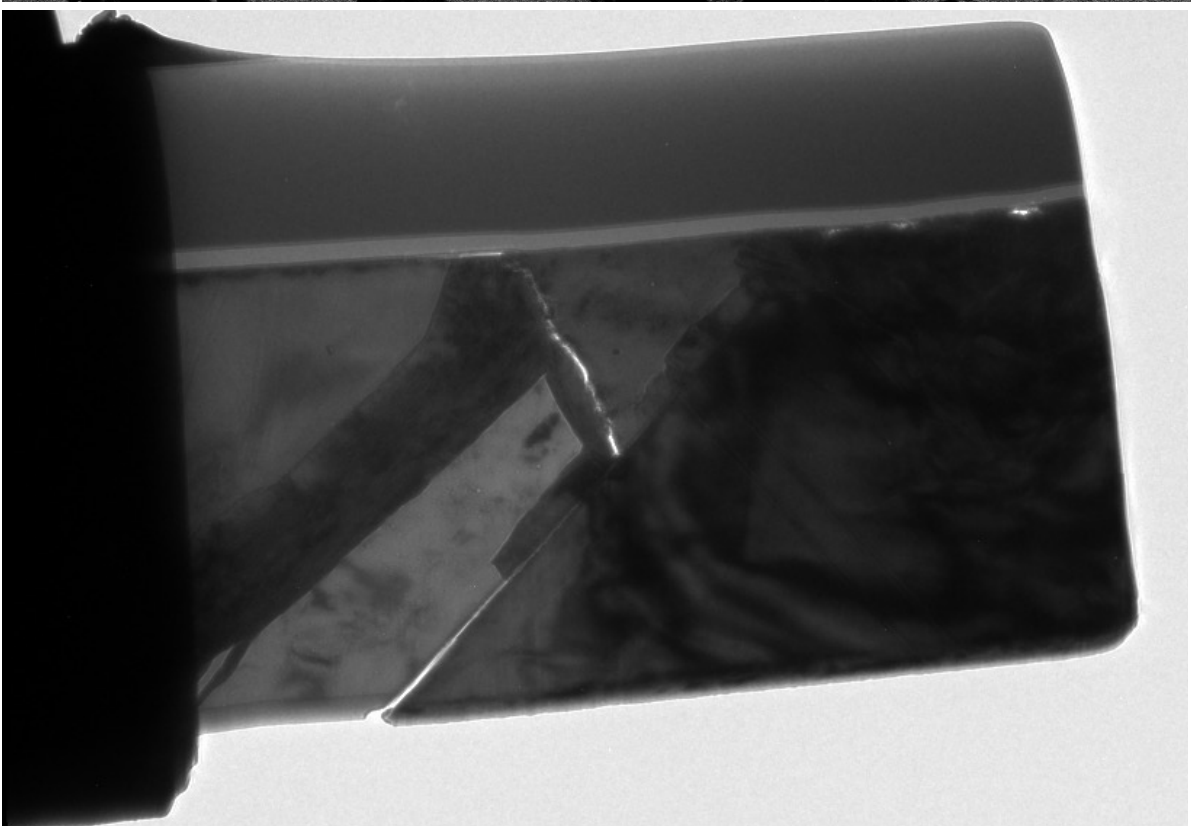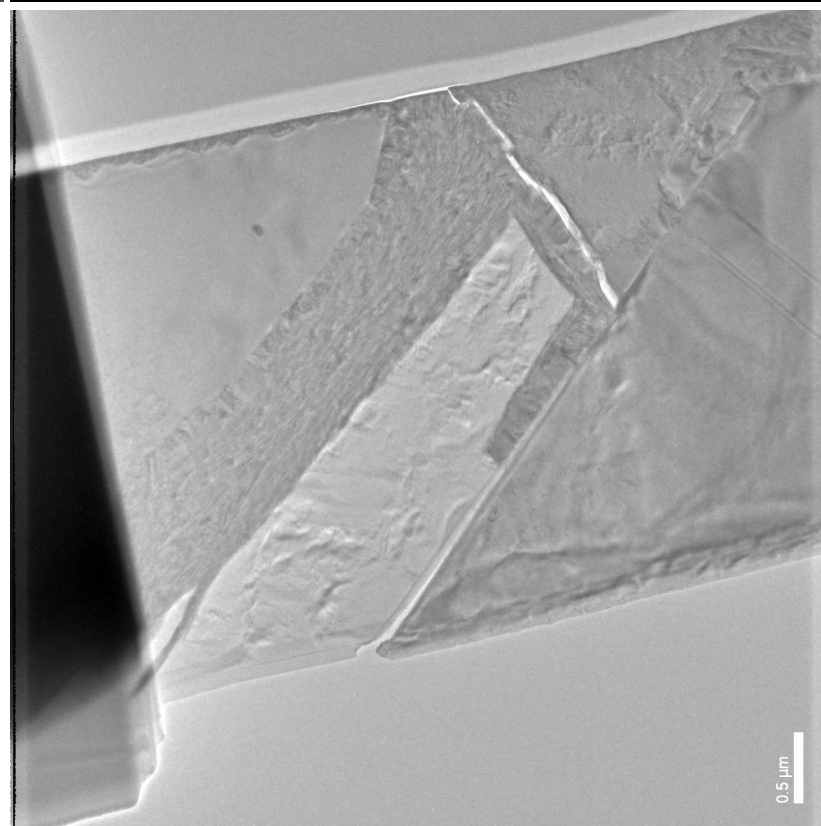



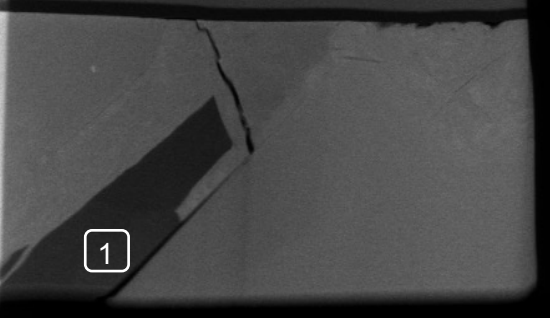

$\alpha$ -Quartz  
(SiO<sub>2</sub>)

10 nm

FFT (1)

2 1/nm

$\alpha$ -Quartz (SiO<sub>2</sub>) (trigonal;  $P3_221$ )

| Spot# | d-Spacing (nm) | (hkl)       | Ideal d-Spacing (Å) |
|-------|----------------|-------------|---------------------|
| 1     | 0.424061       | (100)       | 4.2552              |
| 2     | 0.428226       | (100)       | 4.2552              |
| 3     | 0.213034       | (200)       | 2.1276              |
| 4     | 0.213958       | (200)       | 2.1276              |
| 5     | 0.227543       | (102)/(012) | 2.2813              |
| 6     | 0.22722        | (102)/(012) | 2.2813              |
| 8     | 0.155821       | (211)/(112) | 1.5415              |
| 7     | 0.155516       | (211)/(112) | 1.5415              |



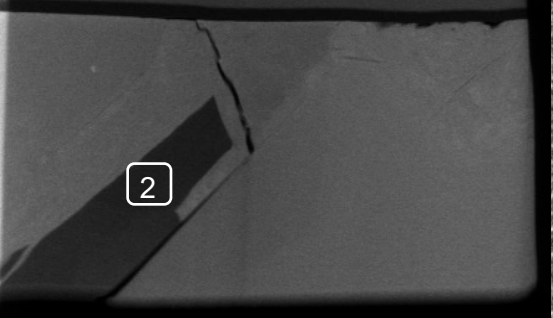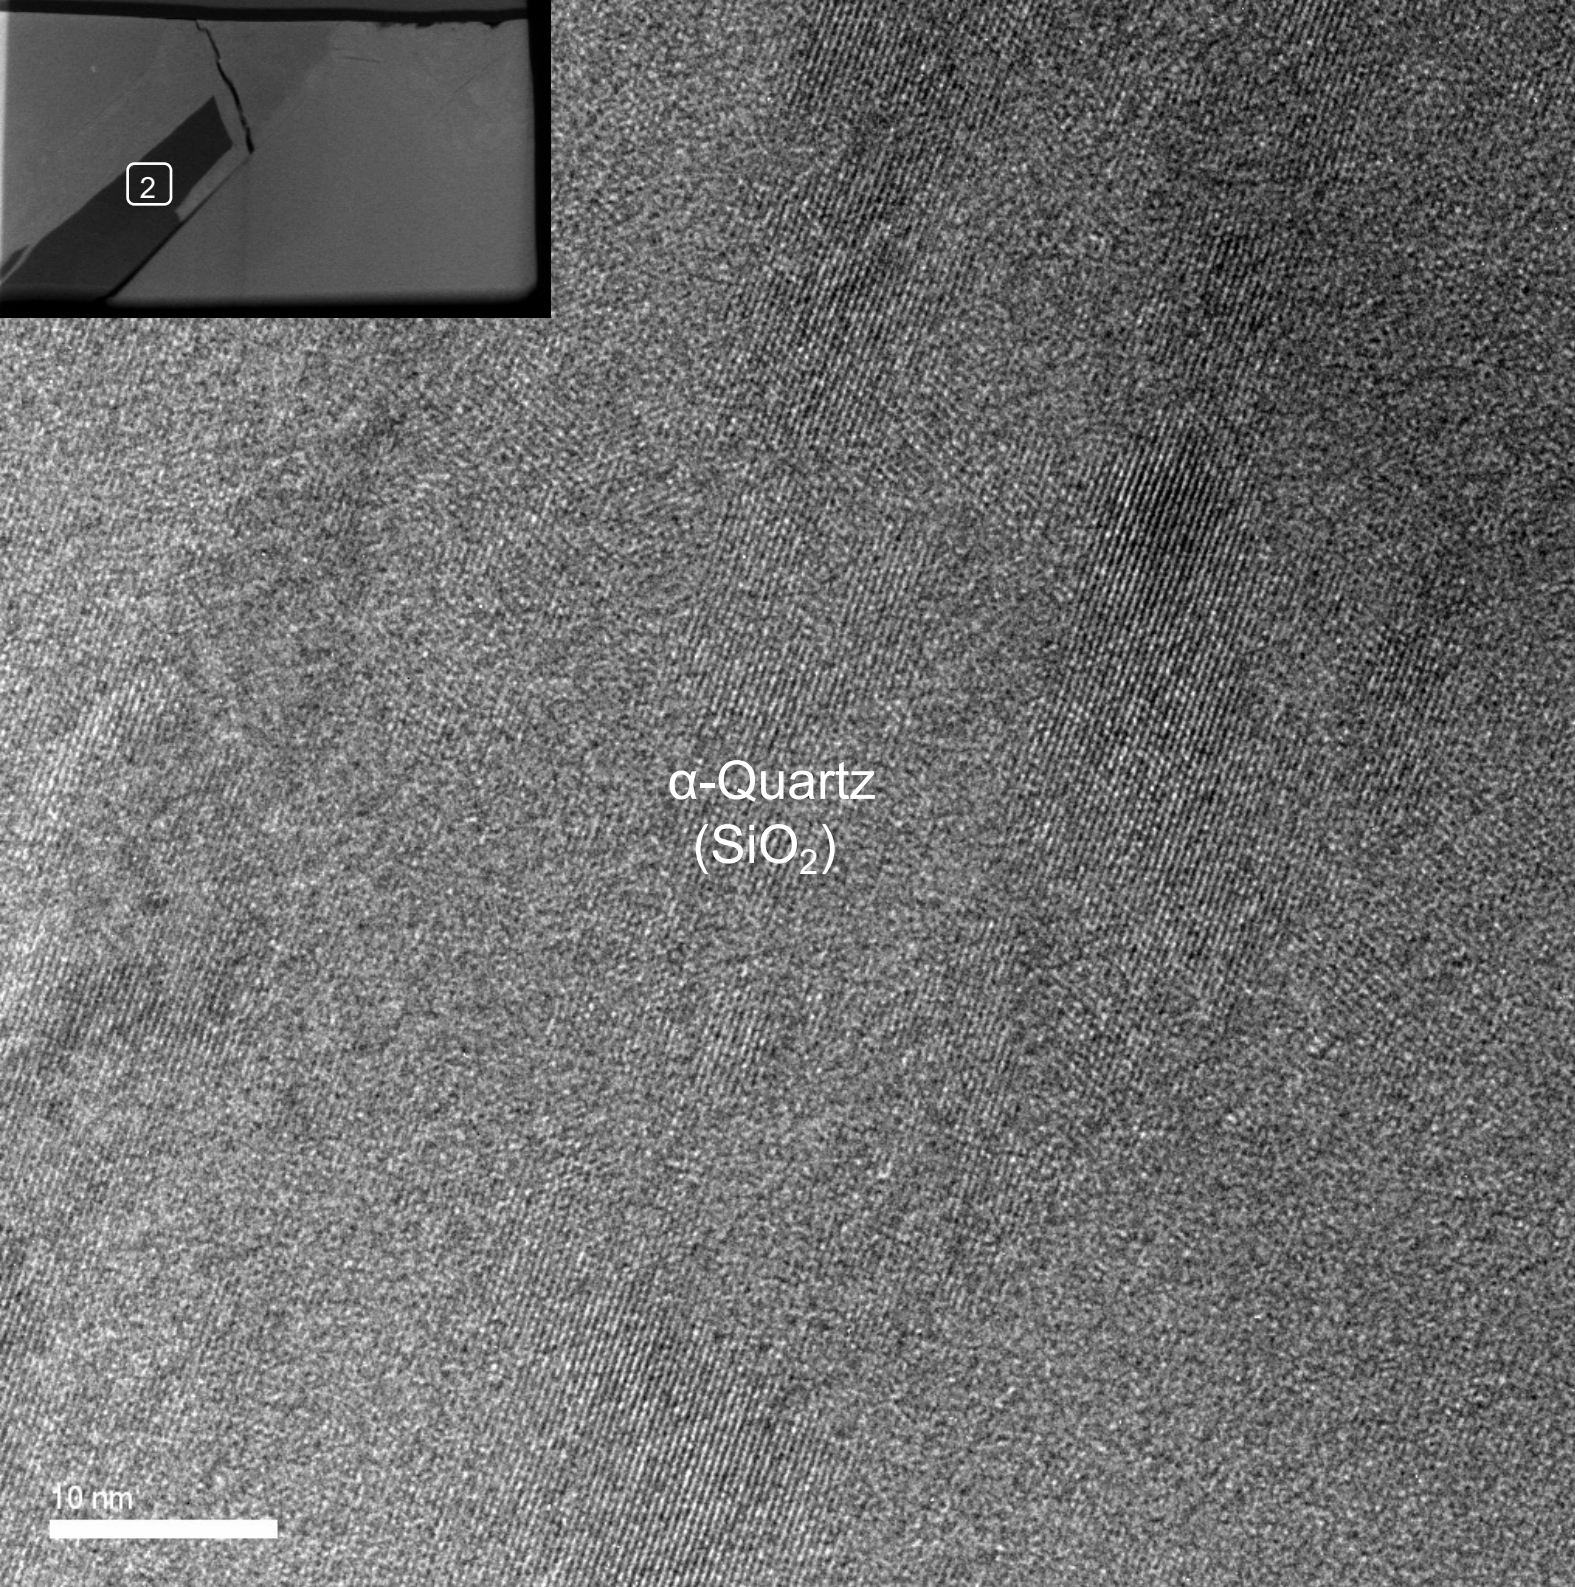

$\alpha$ -Quartz  
(SiO<sub>2</sub>)

10 nm

FFT (2)

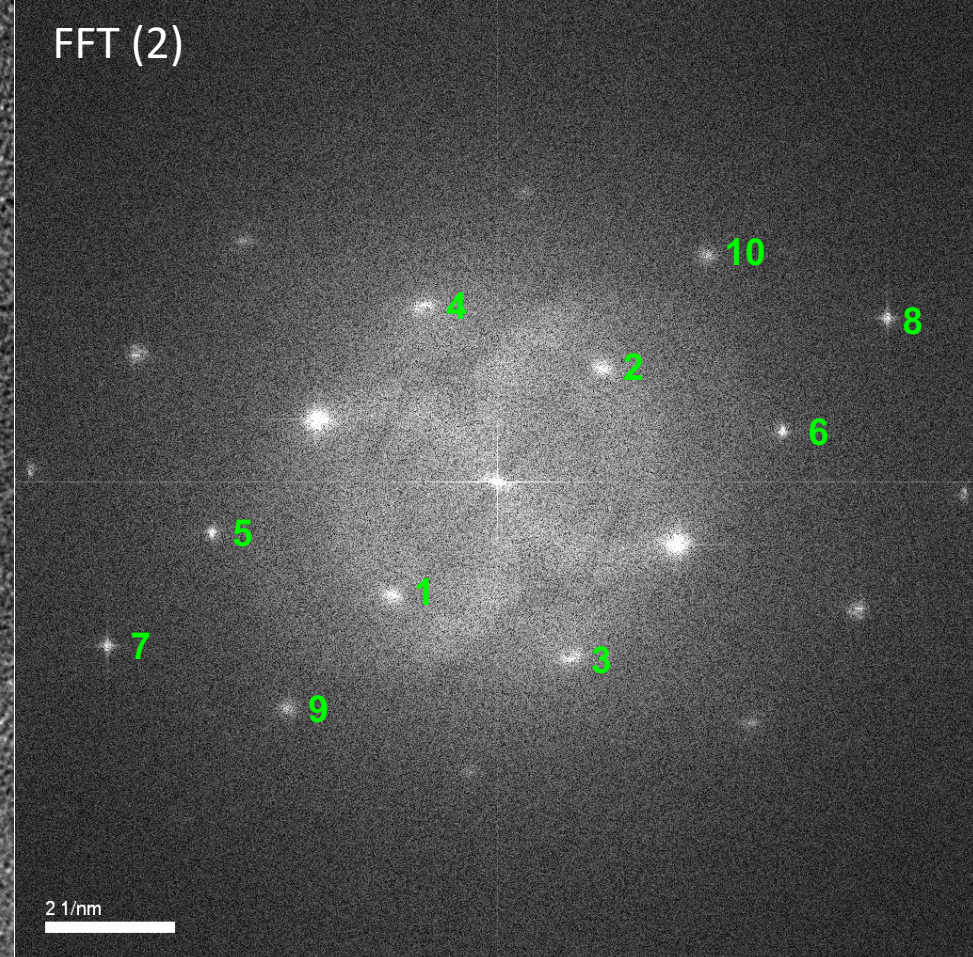

$\alpha$ -Quartz (SiO<sub>2</sub>) (trigonal;  $P3_221$ )

| Spot# | d-Spacing (nm) | (hkl)       | Ideal d-Spacing (Å) |
|-------|----------------|-------------|---------------------|
| 1     | 0.428028       | (100)       | 4.2552              |
| 2     | 0.431487       | (100)       | 4.2552              |
| 3     | 0.339058       | (011)       | 3.3434              |
| 4     | 0.342101       | (011)       | 3.3434              |
| 5     | 0.225607       | (102)/(012) | 2.2813              |
| 6     | 0.225917       | (102)/(012) | 2.2813              |
| 7     | 0.154627       | (211)/(112) | 1.5415              |
| 8     | 0.15494        | (211)/(112) | 1.5415              |
| 9     | 0.210777       | (200)       | 2.1276              |
| 10    | 0.211756       | (200)       | 2.1276              |



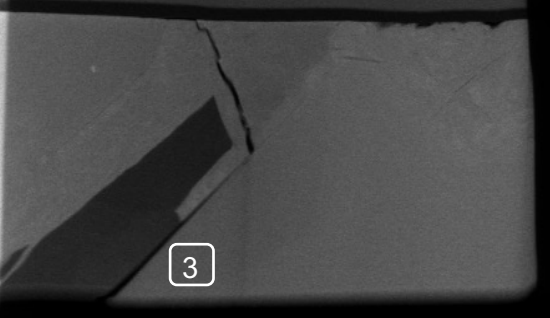

FFT (3)

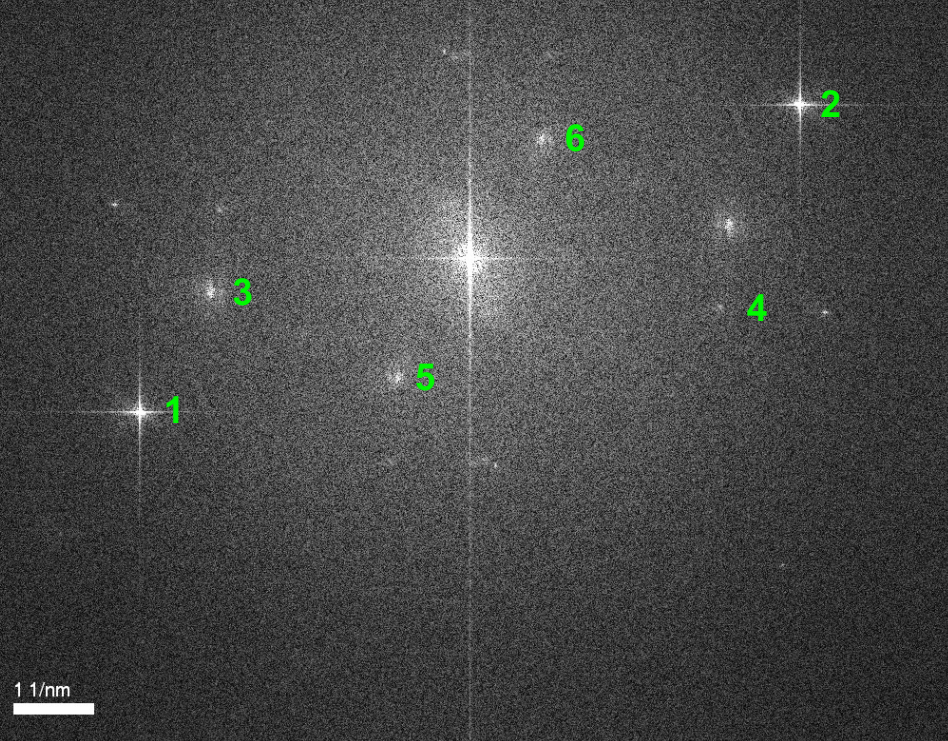

Pyrite ( $\text{FeS}_2$ ) (cubic; P3a)

Pyrrhotite ( $\text{FeS}$ ) (monoclinic; C2/c politype 4C

& orthorhombic; Cmca polytype 5C)

| Spot# | d-Spacing (nm) | (hkl)                                 | Ideal d-Spacing (Å) |
|-------|----------------|---------------------------------------|---------------------|
| 1     | 0.222296       | $(112)_{\text{Py}}/(211)_{\text{py}}$ | 2.2111              |
| 2     | 0.222769       | $(112)_{\text{Py}}/(211)_{\text{py}}$ | 2.2111              |
| 3     | 0.309592       | $(310)_{\text{Po(mon)}}$              | 3.1093-3.1264       |
| 4     | 0.309801       | $(310)_{\text{Po(mon)}}$              | 3.1093-3.1264       |
| 5     | 0.576752       | $(-111)_{\text{Po(mon)}}$             | 5.7478-6.7739       |
| 6     | 0.583142       | $(111)_{\text{Po(romb)}}$             | 5.8439-5.8456       |

10 nm



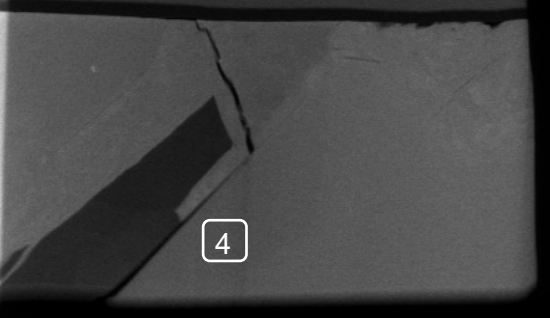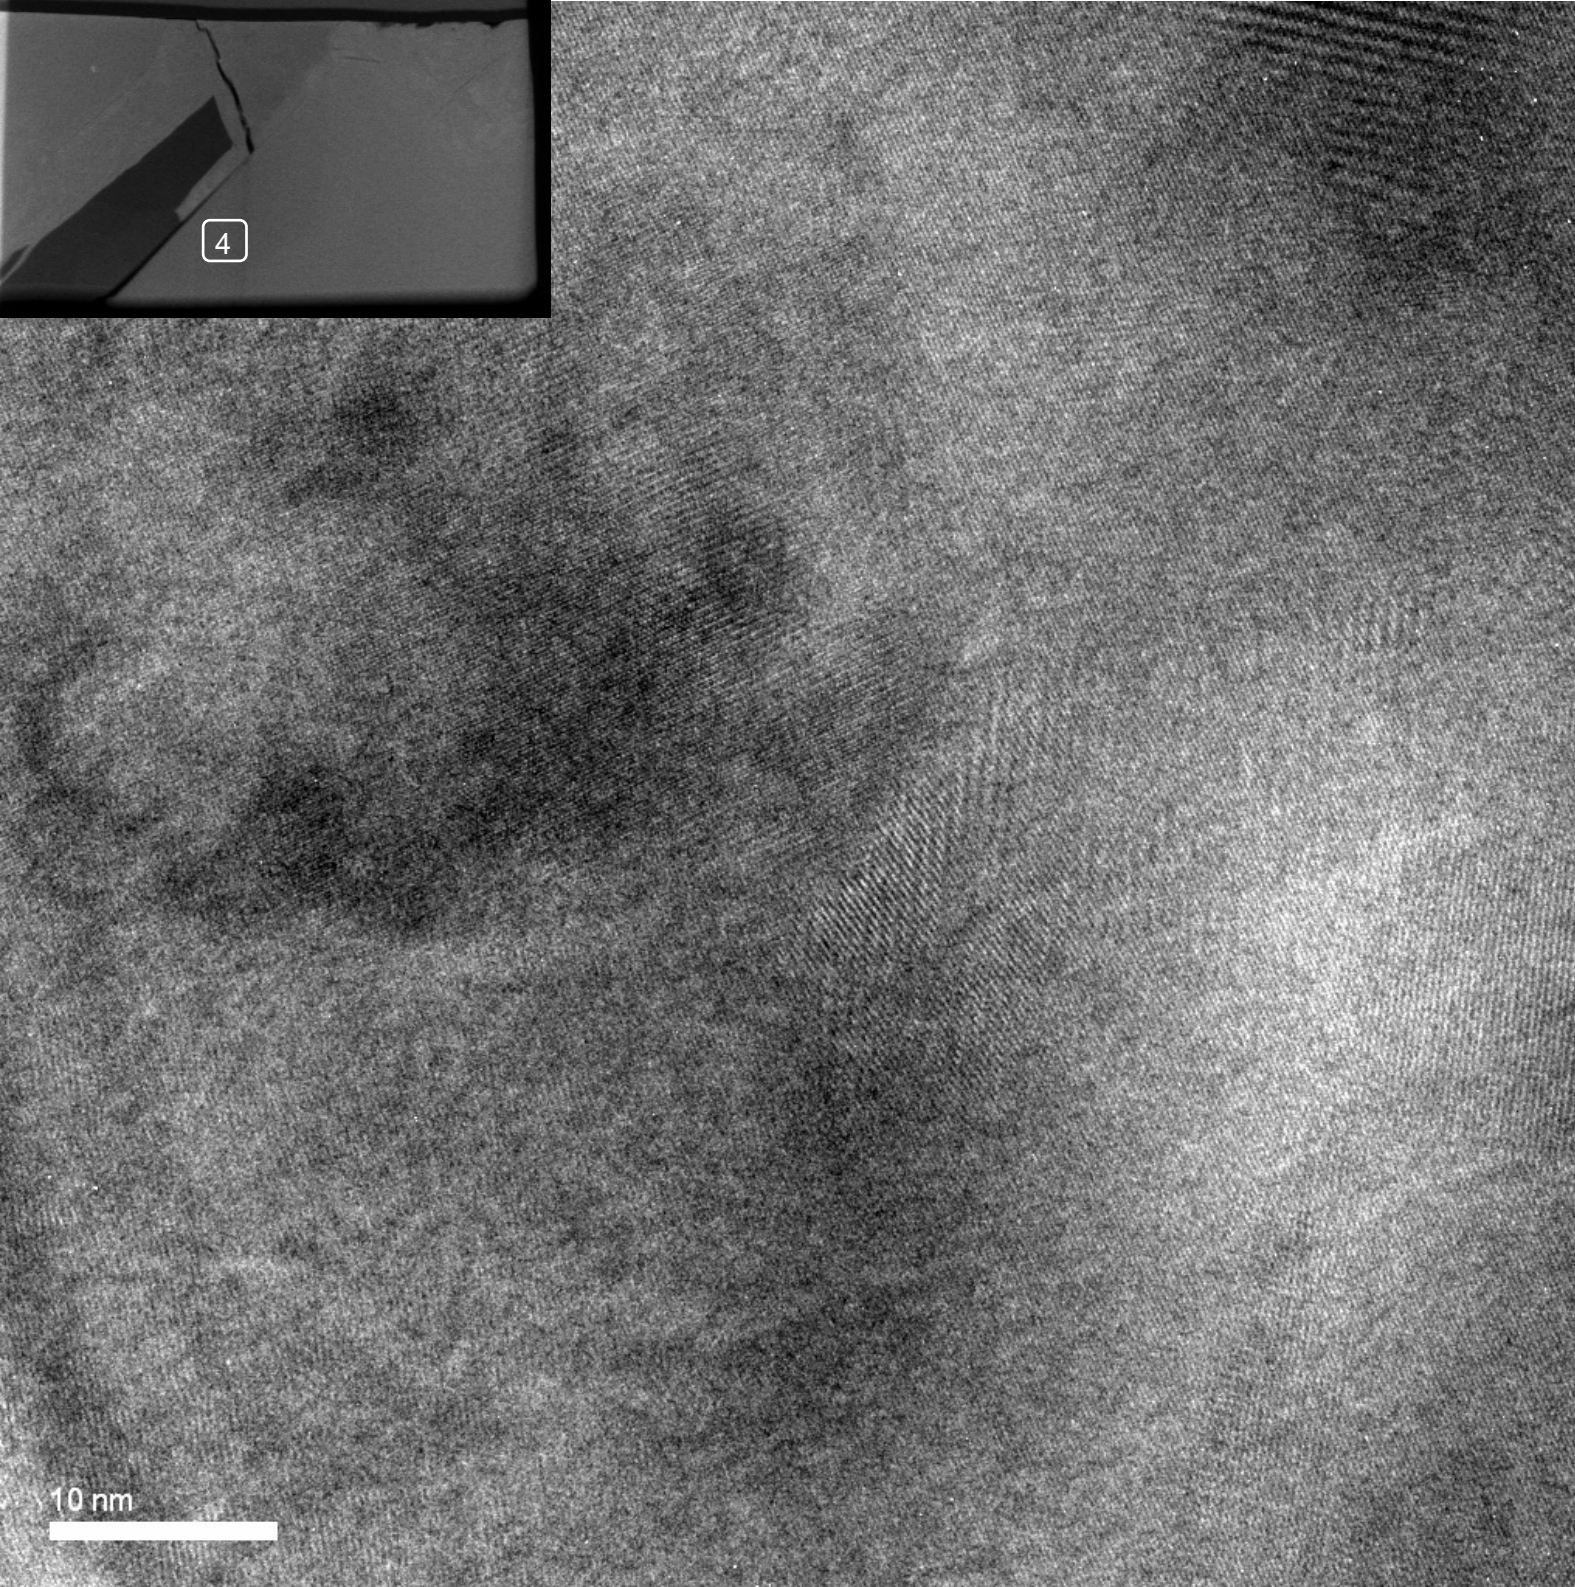

FFT (4)

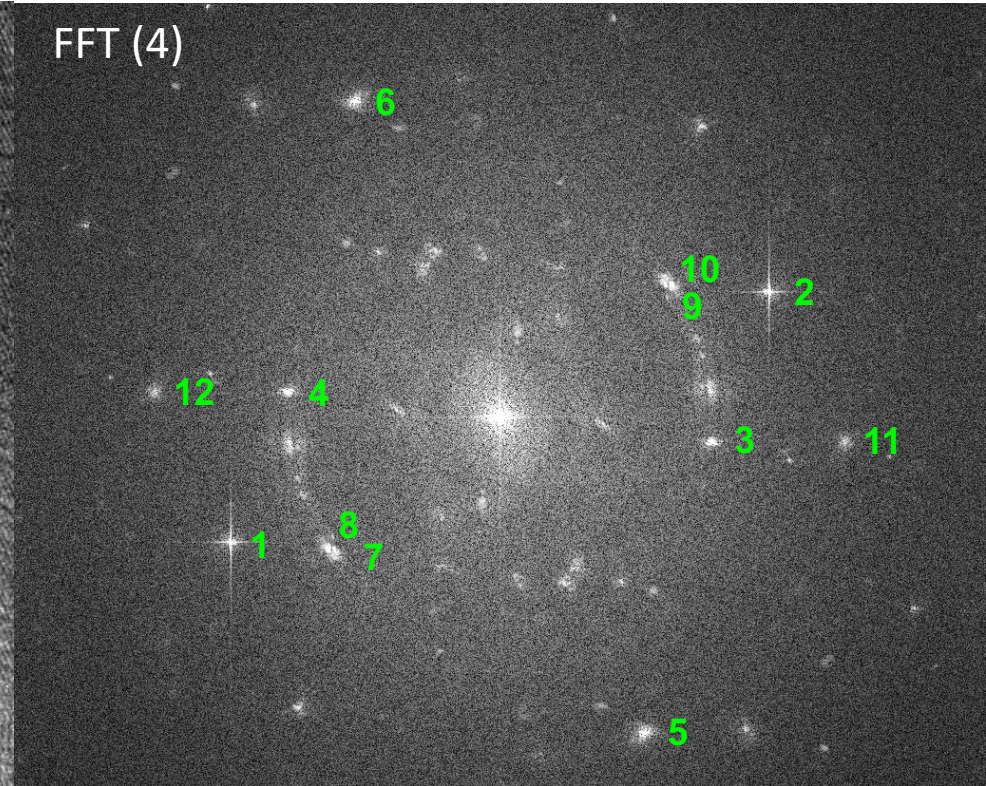

Pyrite (FeS<sub>2</sub>) (cubic; P3a)  
Marcasite (FeS<sub>2</sub>) (orthorrombic; Pnnm)  
Pyrrhotite (FeS)( monoclinic; C2/c politype 4C  
& orthorrhombic; Cmca polytype 5C)

| Spot# | d-Spacing (nm) | (hkl)                                     | Ideal d-Spacing (Å) |
|-------|----------------|-------------------------------------------|---------------------|
| 1     | 0.222955       | (112) <sub>Py</sub> /(211) <sub>py</sub>  | 2.2111              |
| 2     | 0.223701       | (112) <sub>Py</sub> /(211) <sub>py</sub>  | 2.2111              |
| 3     | 0.310442       | (301) <sub>Po(mon)</sub>                  | 3.1264              |
| 4     | 0.309011       | (028) <sub>Po(romb)</sub>                 | 3.0698              |
| 5     | 0.190225       | (121) <sub>Mc</sub> / (202) <sub>Py</sub> | 1.9113/1.9151       |
| 6     | 0.191192       | (121) <sub>Mc</sub> / (202) <sub>Py</sub> | 1.9113/1.9151       |
| 7     | 0.311914       | (301) <sub>Po(mon)</sub>                  | 3.1264              |
| 8     | 0.303478       | (028) <sub>Po(romb)</sub>                 | 3.0698              |
| 9     | 0.313359       | (310) <sub>Po(mon)</sub>                  | 3.1093-3.1264       |
| 10    | 0.30508        | (028) <sub>Po(romb)</sub>                 | 3.0698              |
| 11    | 0.191999       | (121) <sub>Mc</sub> / (202) <sub>Py</sub> | 1.9113/1.9151       |
| 12    | 0.192012       | (121) <sub>Mc</sub> / (202) <sub>Py</sub> | 1.9113/1.9151       |



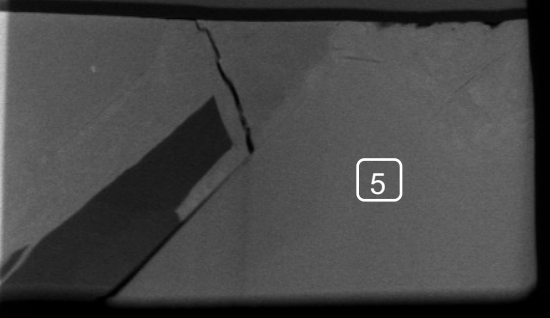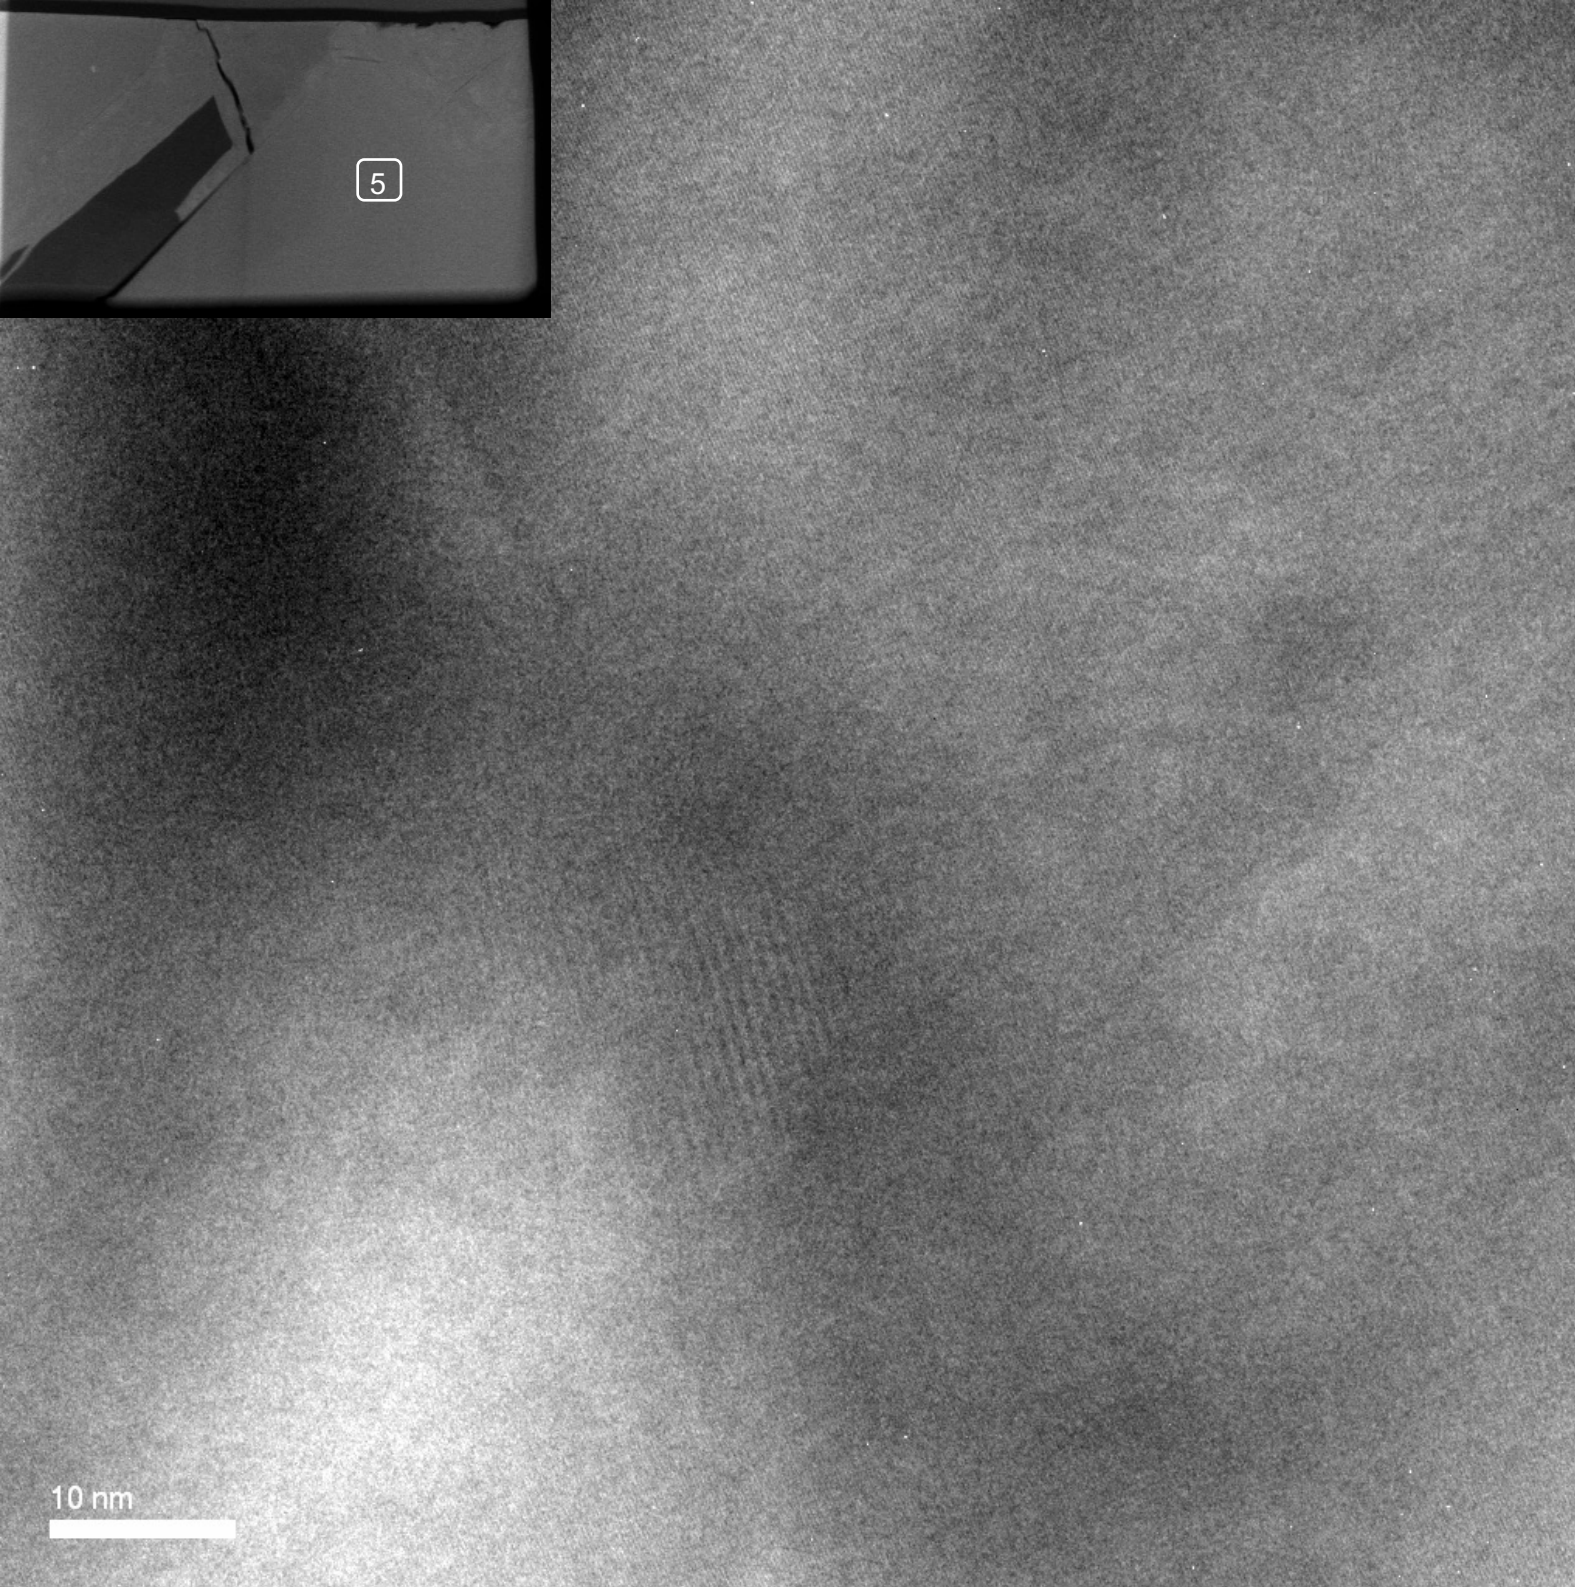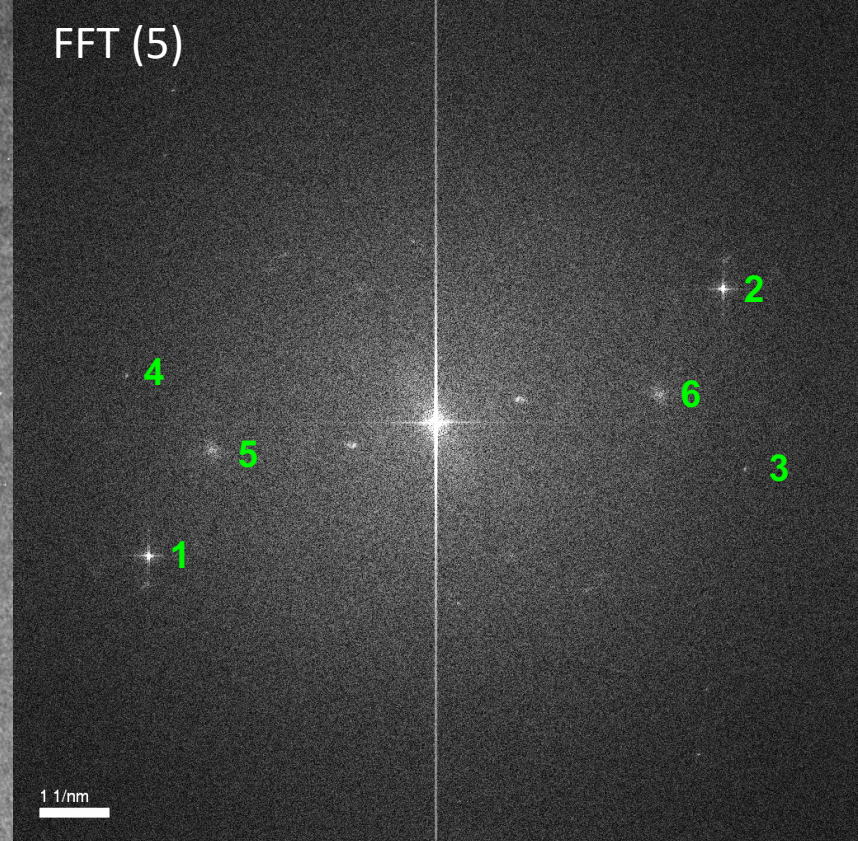

Pyrite (FeS<sub>2</sub>) (cubic; P3a)

| Spot# | d-Spacing (nm) | (hkl)                                    | Ideal d-Spacing (Å) |
|-------|----------------|------------------------------------------|---------------------|
| 1     | 0.222058       | (112) <sub>Py</sub> /(211) <sub>Py</sub> | 2.2113              |
| 2     | 0.222559       | (112) <sub>Py</sub> /(211) <sub>Py</sub> | 2.2113              |
| 3     | 0.225559       | (112) <sub>Py</sub> /(211) <sub>Py</sub> | 2.2113              |
| 4     | 0.225704       | (112) <sub>Py</sub> /(211) <sub>Py</sub> | 2.2113              |
| 7     | 0.310191       | (111) <sub>py</sub>                      | 3.1269-3.1273       |
| 6     | 0.310467       | (111) <sub>py</sub>                      | 3.1269-3.1273       |



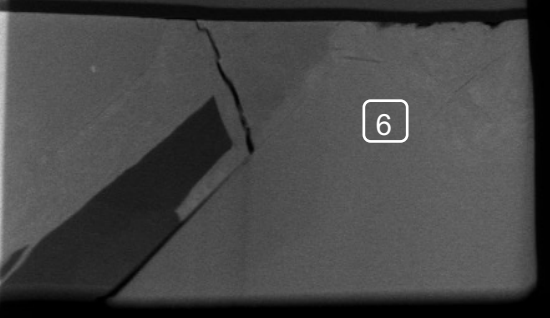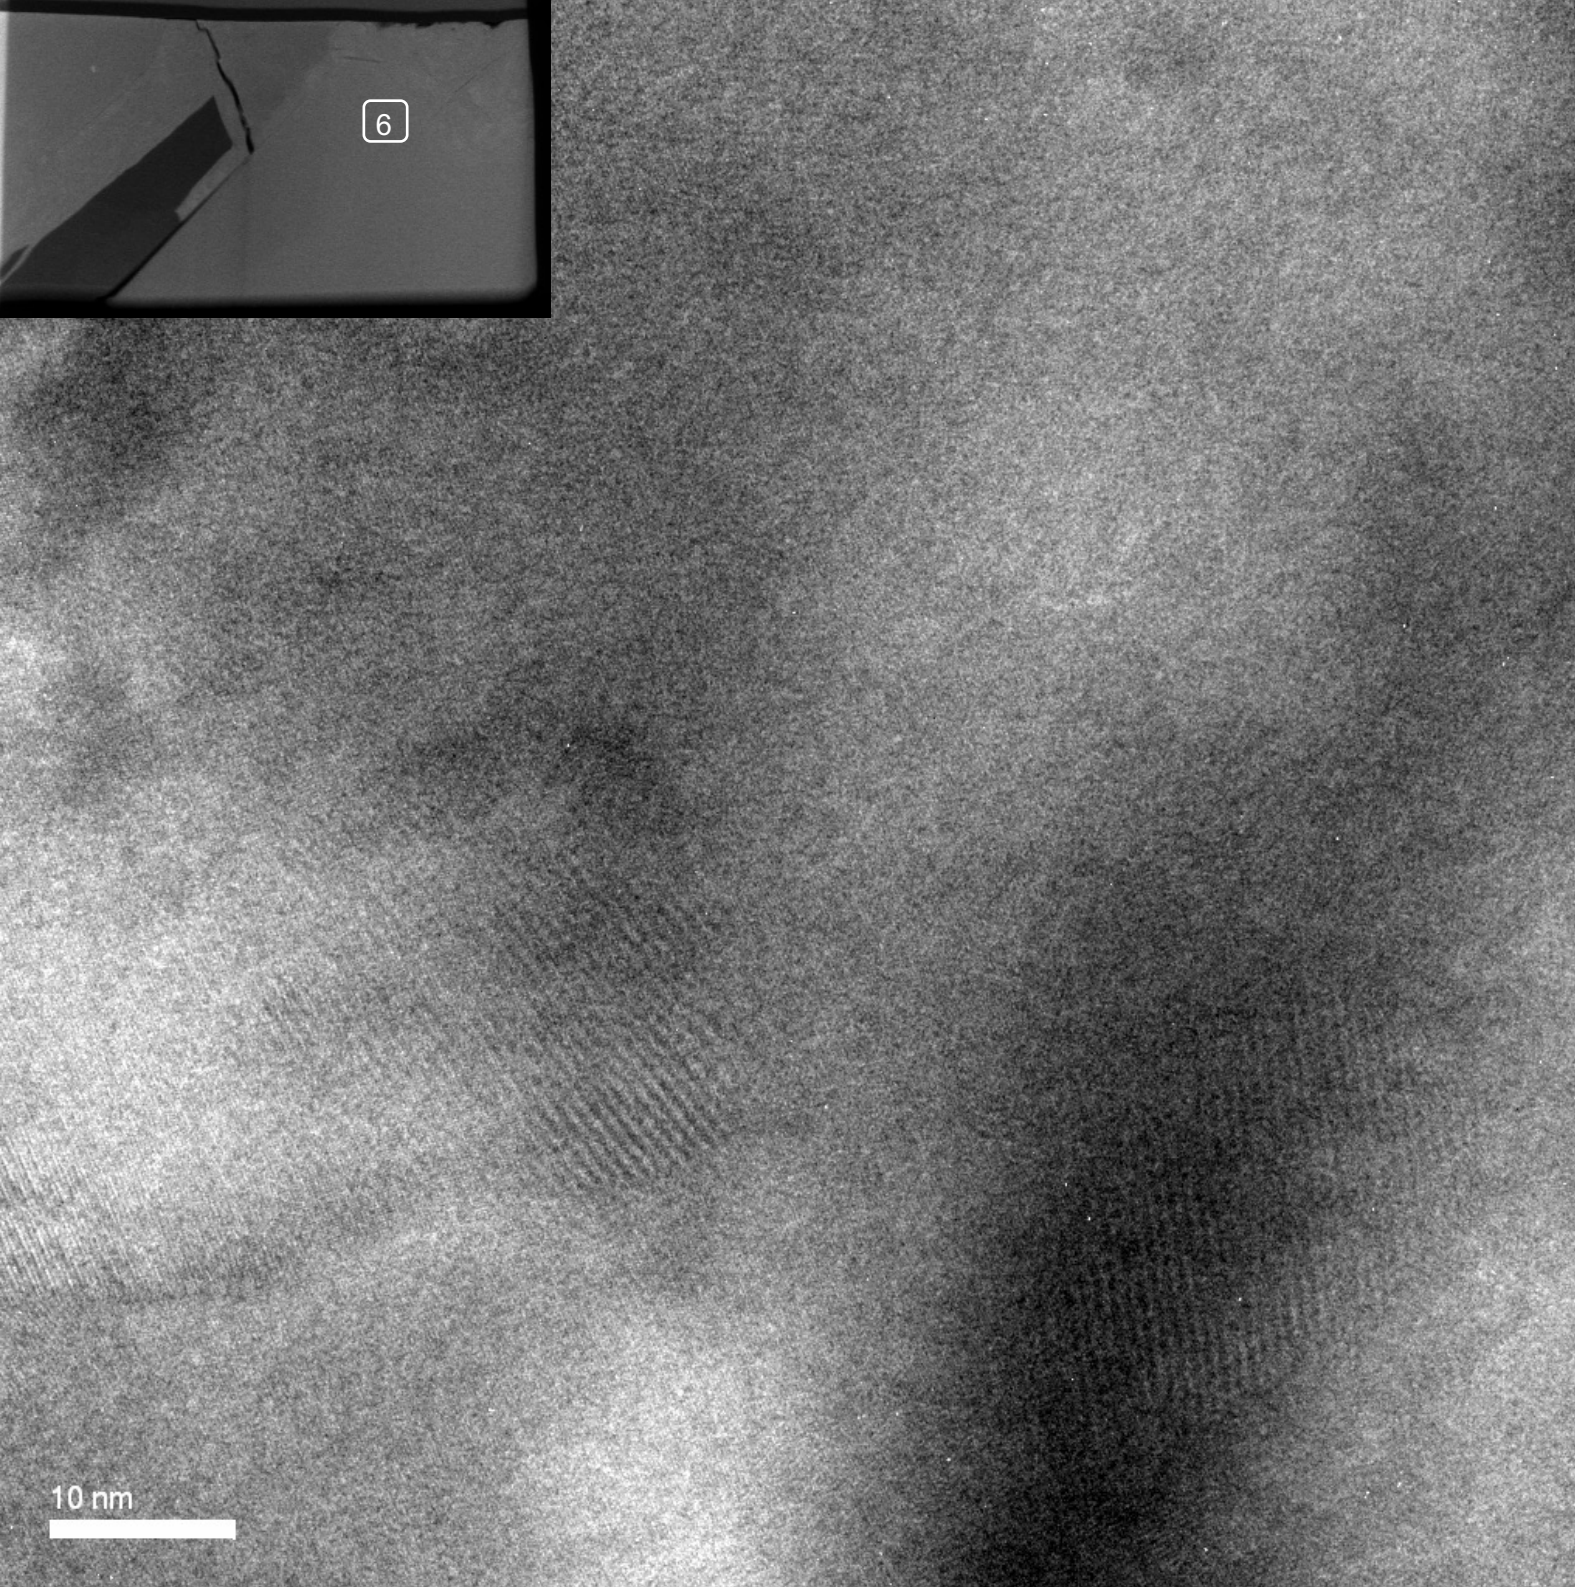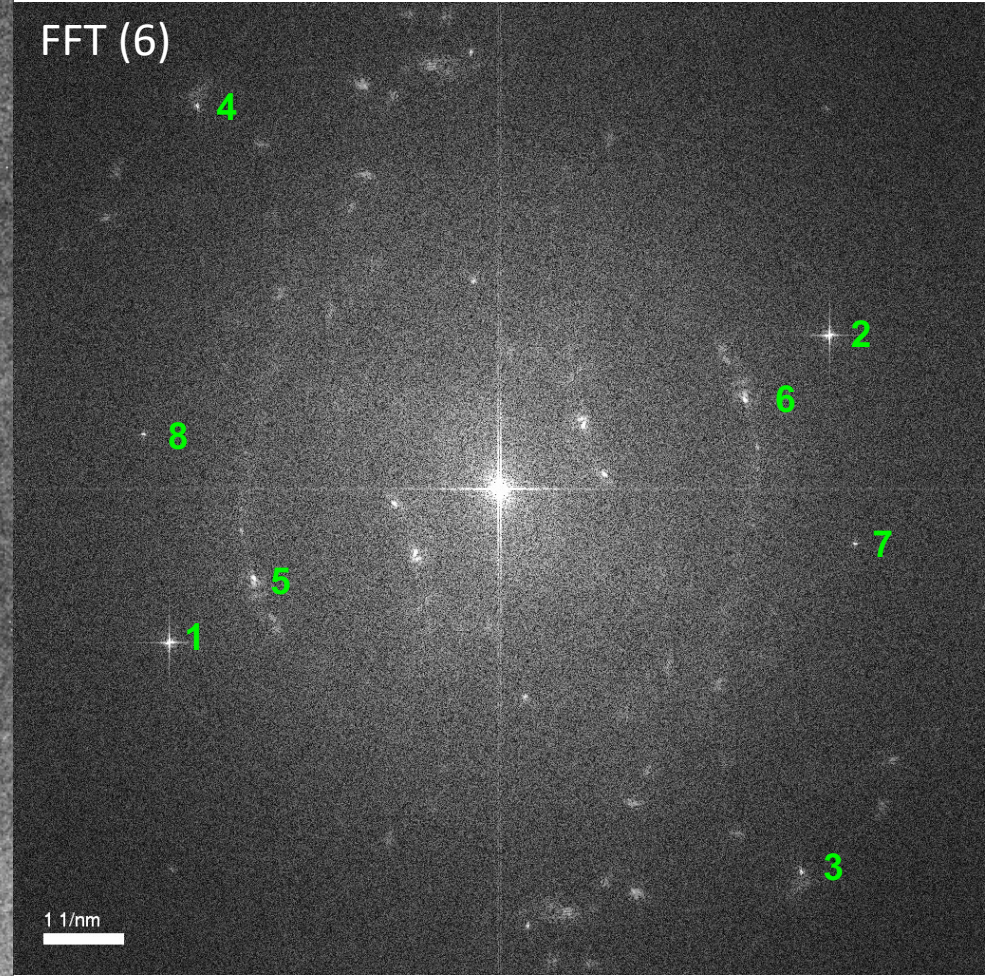

| Pyrite (FeS <sub>2</sub> ) (cubic; P3a)         |                |                                          |                     |
|-------------------------------------------------|----------------|------------------------------------------|---------------------|
| Pyrrhotite (FeS)( monoclinic; C2/c polytype 4C) |                |                                          |                     |
| Spot#                                           | d-Spacing (nm) | (hkl)                                    | Ideal d-Spacing (Å) |
| 1                                               | 0.222283       | (112) <sub>Py</sub> /(211) <sub>Py</sub> | 2.2113              |
| 2                                               | 0.222743       | (112) <sub>Py</sub> /(211) <sub>Py</sub> | 2.2113              |
| 3                                               | 0.166243       | (222) <sub>py</sub> /(130) <sub>Mc</sub> | 1.6526/1.6749       |
| 4                                               | 0.166481       | (222) <sub>py</sub> /(130) <sub>Mc</sub> | 1.6526/1.6749       |
| 5                                               | 0.309353       | (310) <sub>Po(mon)</sub>                 | 3.1093-3.1264       |
| 6                                               | 0.31022        | (310) <sub>Po(mon)</sub>                 | 3.1093-3.1264       |
| 7                                               | 0.224774       | (112) <sub>Py</sub> /(211) <sub>Py</sub> | 2.2113              |
| 8                                               | 0.22506        | (112) <sub>Py</sub> /(211) <sub>Py</sub> | 2.2113              |



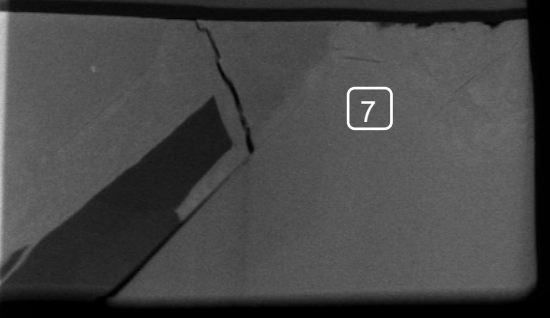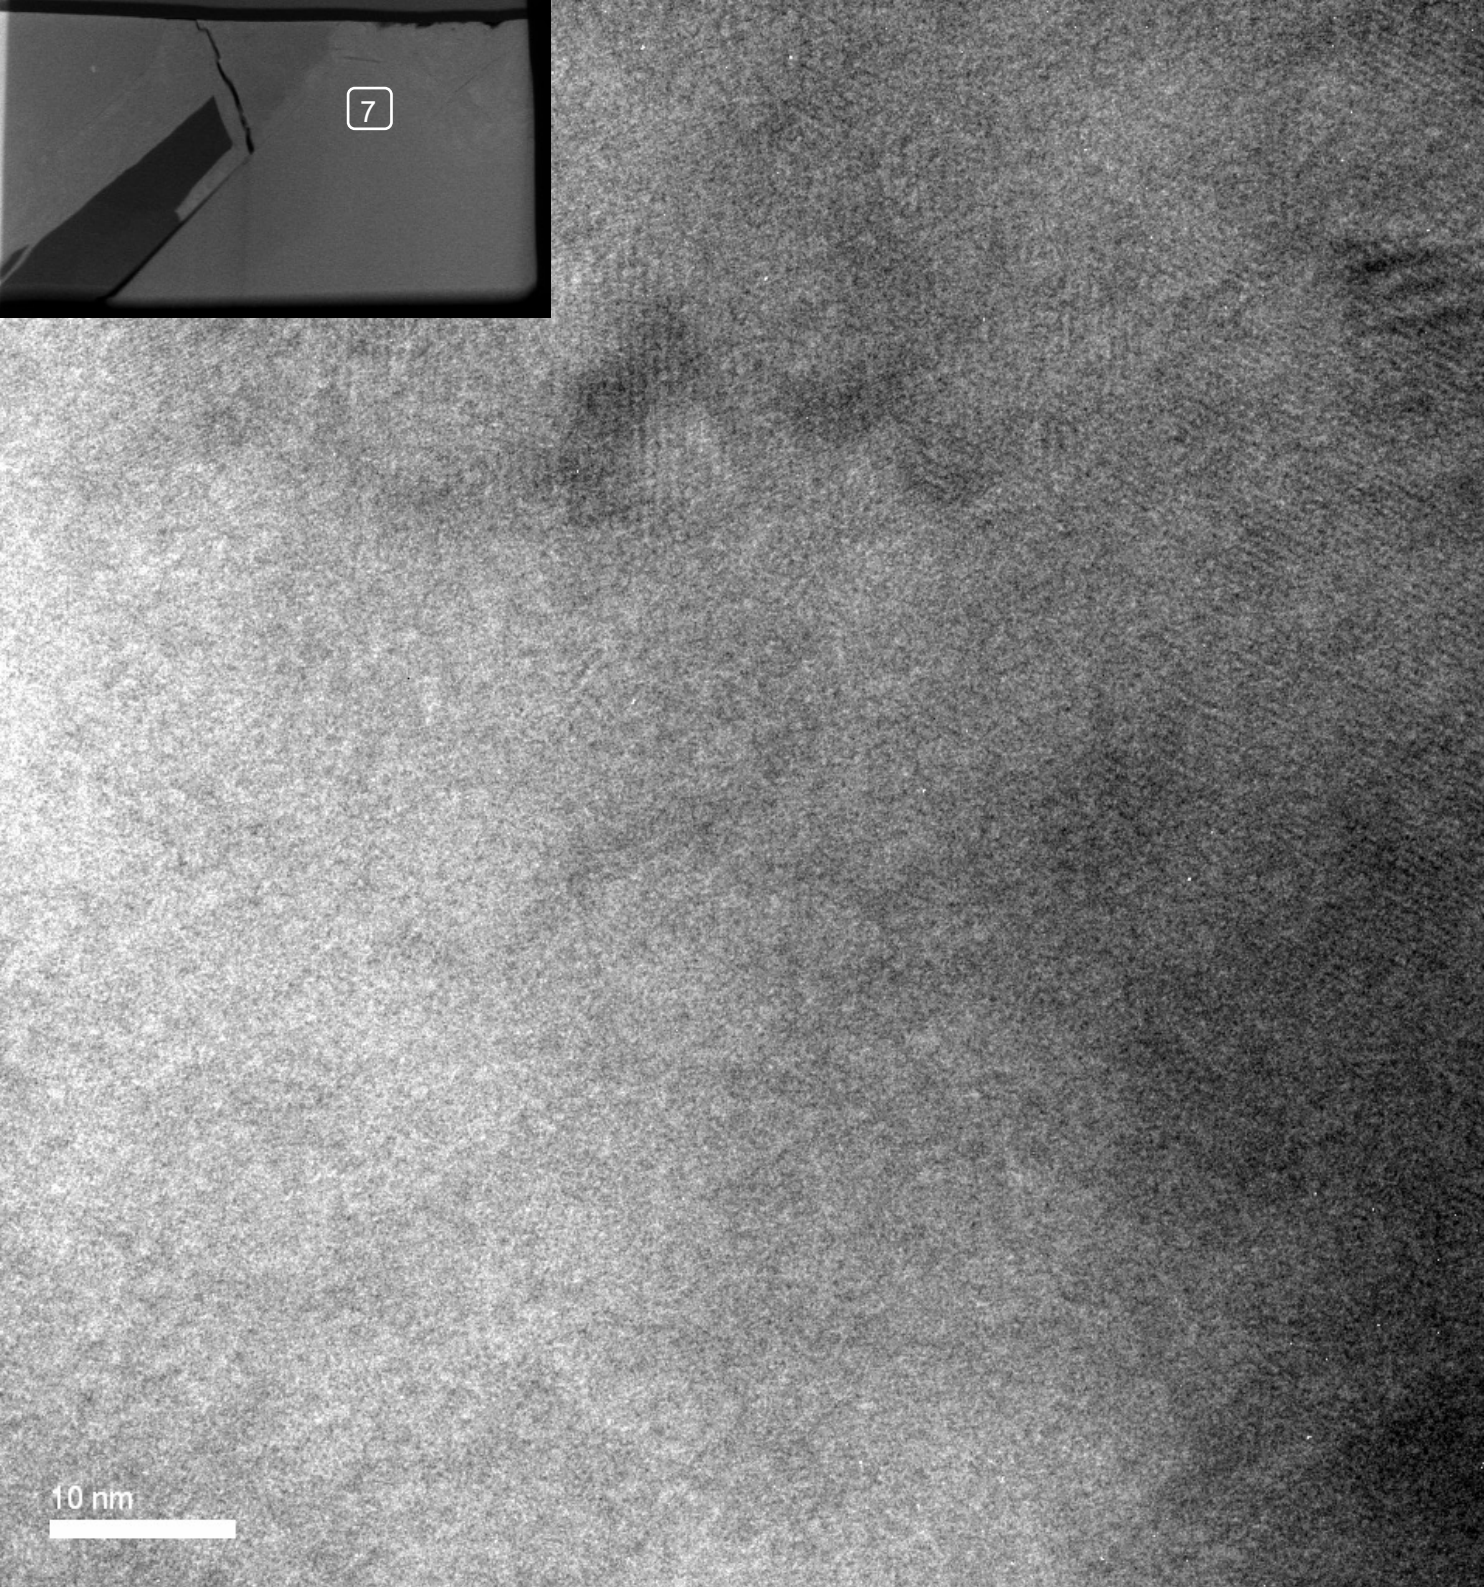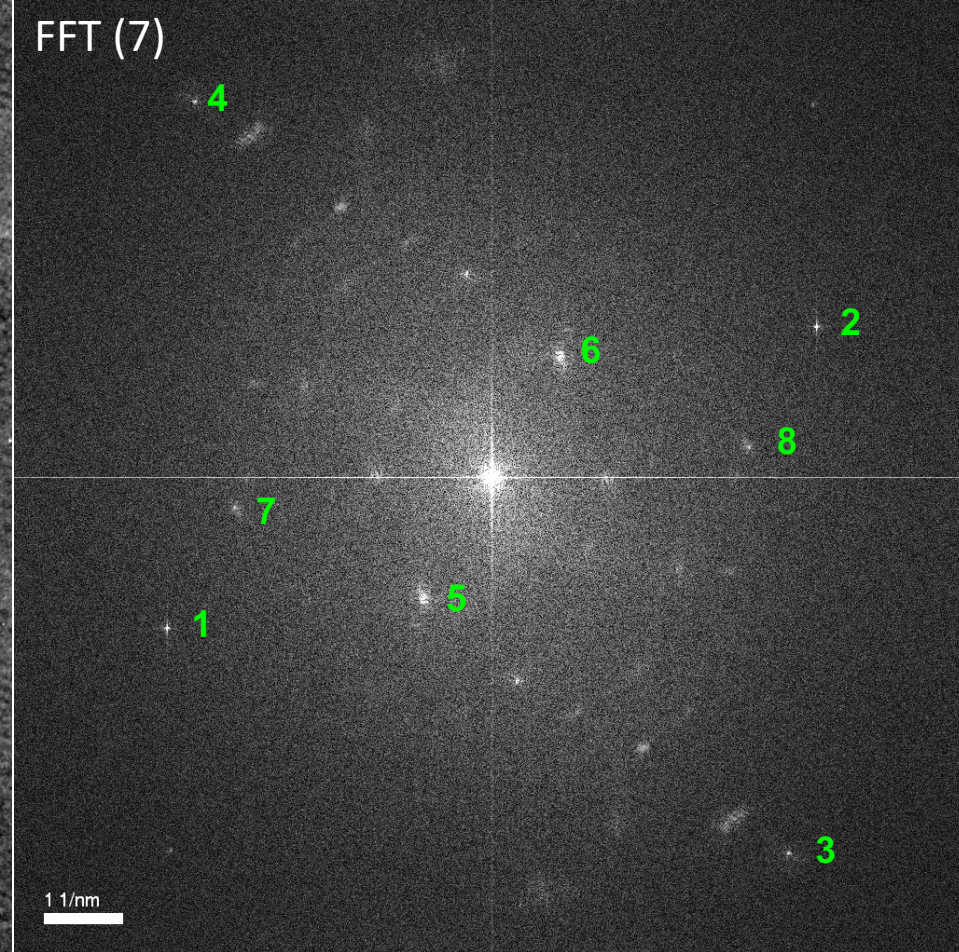

Pyrite ( $\text{FeS}_2$ ) (cubic; P3a)

Marcasite ( $\text{FeS}_2$ ) (orthorhombic; Pnnm)

Pyrrhotite ( $\text{FeS}$ ) (monoclinic; C2/c politype 4c & rhombic; Cmca)

| Spot# | d-Spacing (nm) | (hkl)                                    | Ideal d-Spacing (Å)   |
|-------|----------------|------------------------------------------|-----------------------|
| 1     | 0.222326       | $(112)_{\text{Py}}/(211)_{\text{py}}$    | 2.2111                |
| 2     | 0.222821       | $(112)_{\text{Py}}/(211)_{\text{py}}$    | 2.2111                |
| 3     | 0.165979       | $(222)_{\text{py}}/(130)_{\text{mc}}$    | 1.6526                |
| 4     | 0.166465       | $(222)_{\text{py}}/(130)_{\text{mc}}$    | 1.6526                |
| 5     | 0.572329       | $\{101\}_{\text{py}}/(-111)_{\text{po}}$ | 5.7249/ 5.7478-5.7606 |
| 6     | 0.576488       | $\{101\}_{\text{py}}/(-111)_{\text{po}}$ | 5.7249/ 5.7478-5.7606 |
| 7     | 0.30695        | $(028)_{\text{Po(romb)}}$                | 3.0698                |
| 8     | 0.30743        | $(028)_{\text{Po(romb)}}$                | 3.0698                |



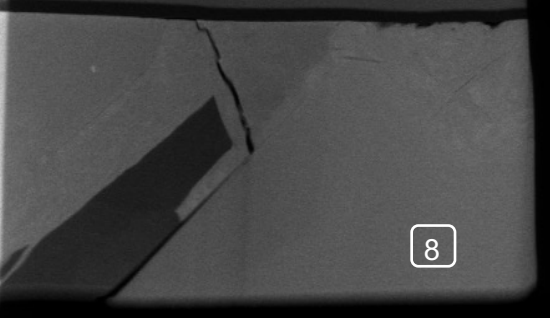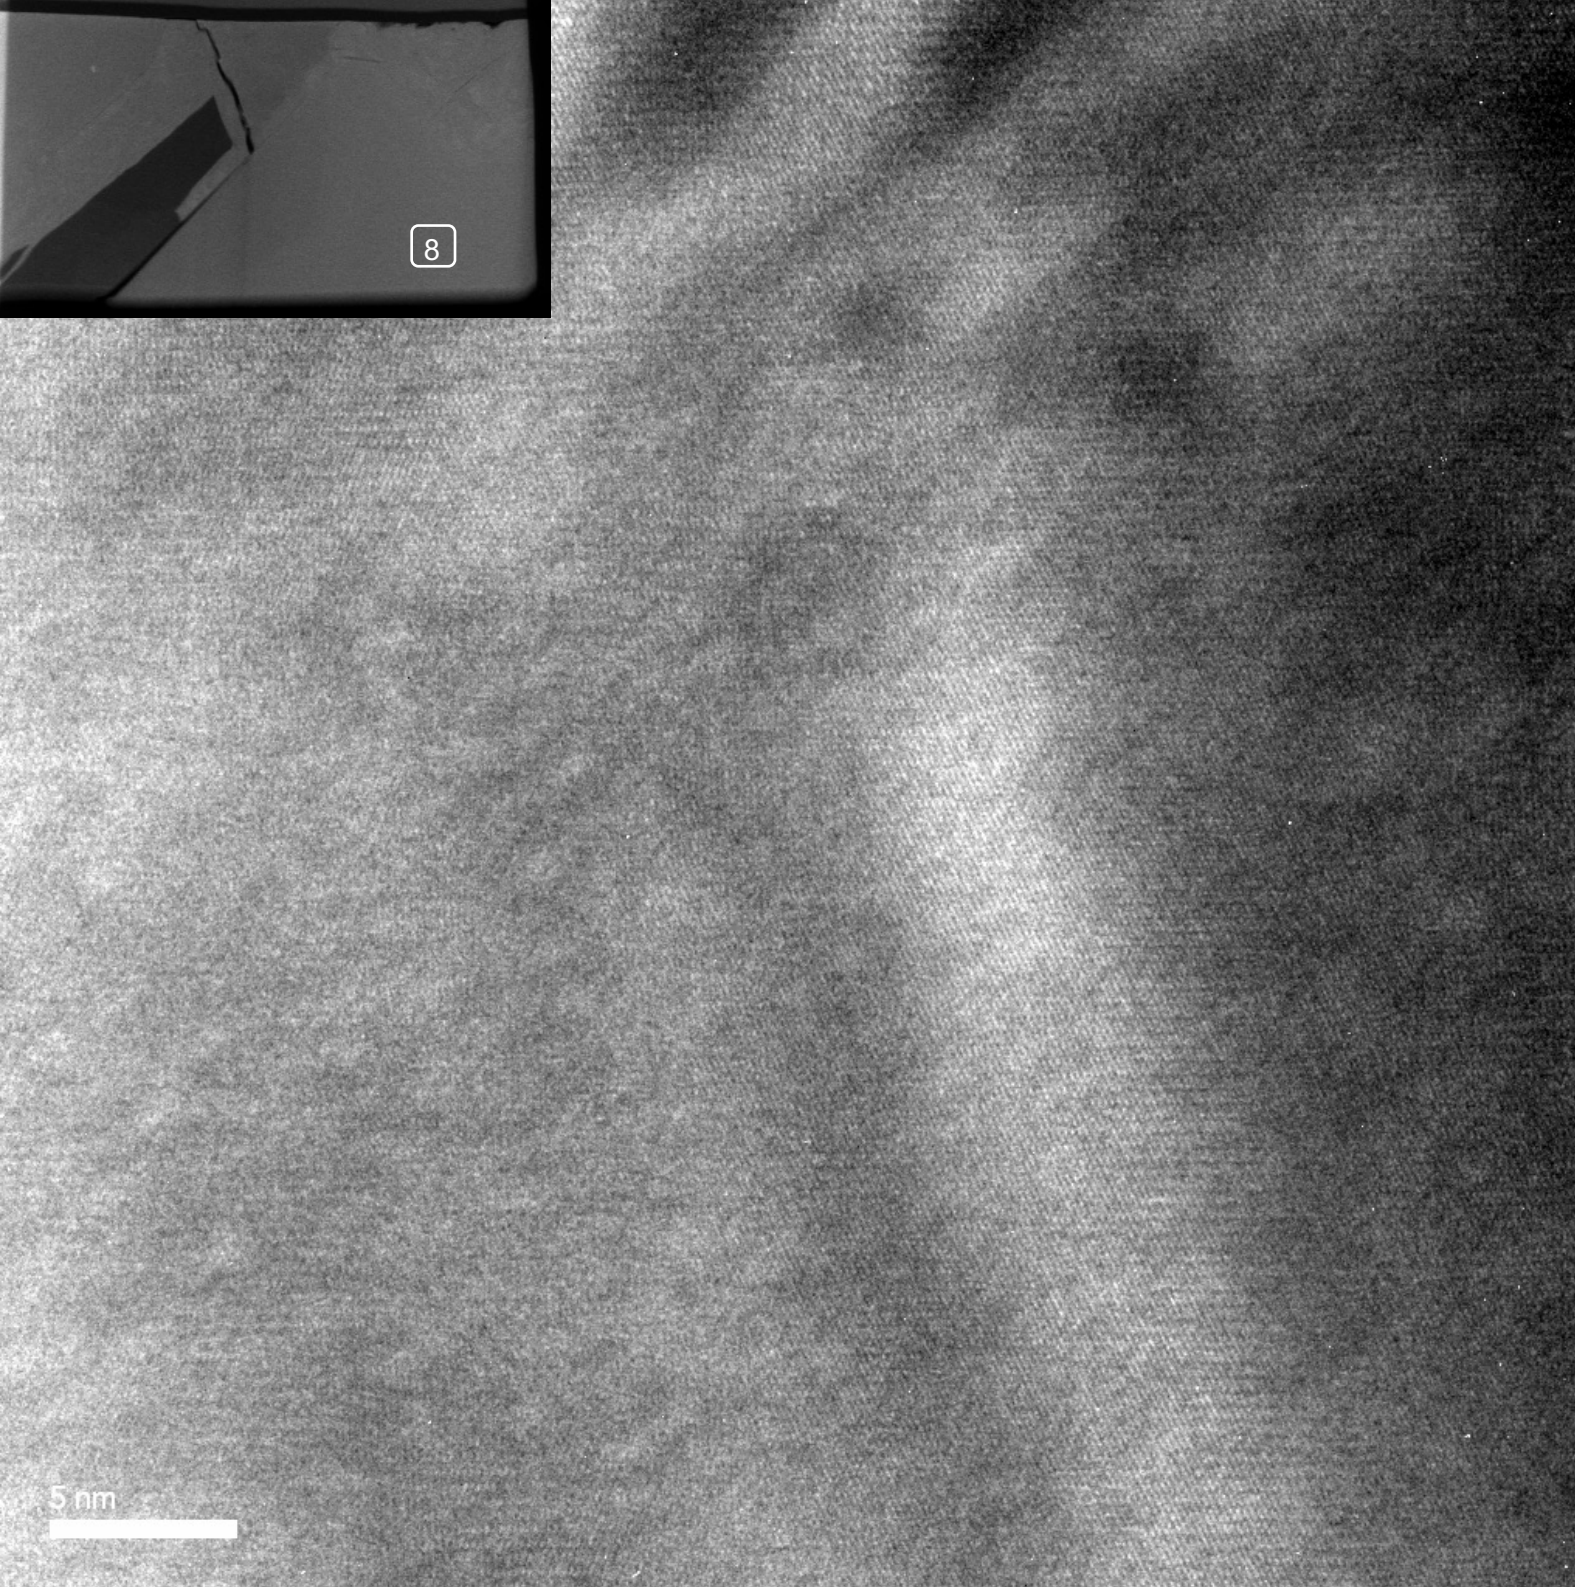

FFT (8)

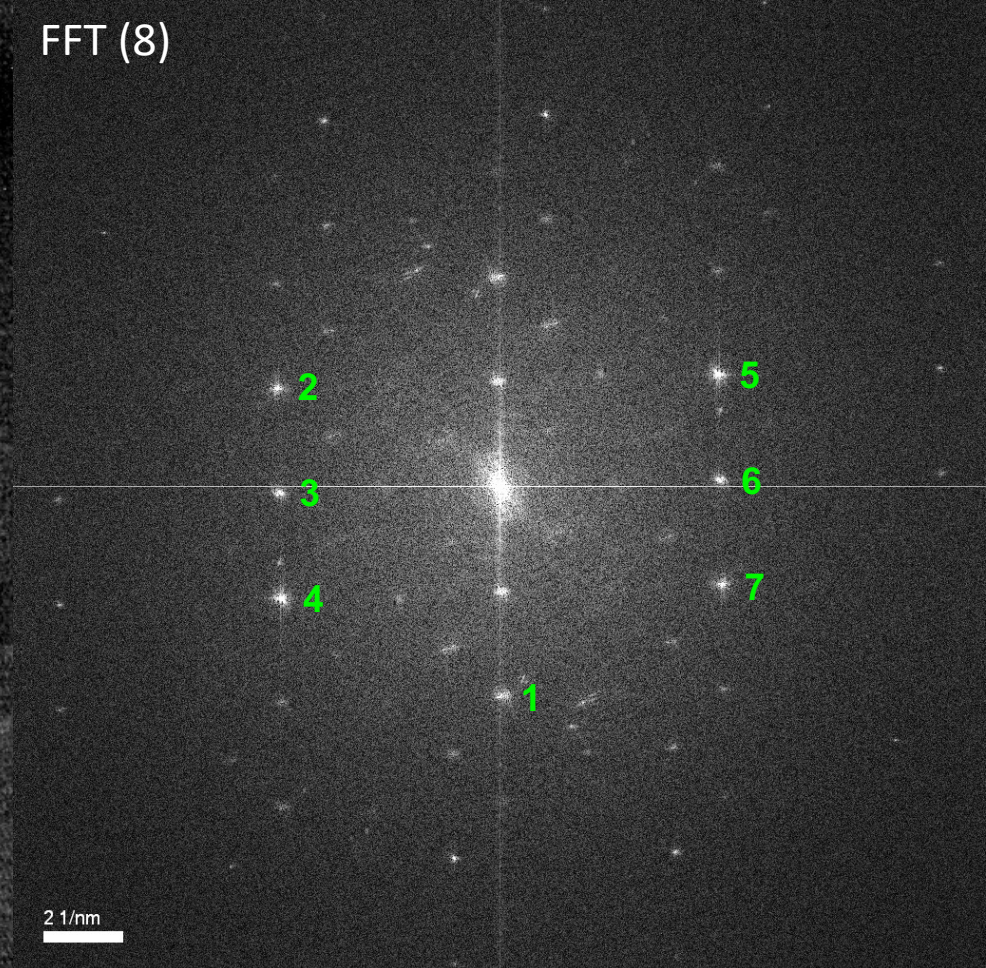Pyrite ( $\text{FeS}_2$ ) (cubic; P3a)Marcasite ( $\text{FeS}_2$ ) (orthorrombic; Pnnm)Pyrrhotite ( $\text{FeS}$ ) (monoclinic; C2/c politype 4c)

| Spot# | d-Spacing (nm) | (hkl)                                 | Ideal d-Spacing (Å) |
|-------|----------------|---------------------------------------|---------------------|
| 1     | 0.191392       | $(221)_{\text{py}}/(121)_{\text{Mc}}$ | 1.9083/1.9113       |
| 2     | 0.166191       | $(222)_{\text{py}}/(130)_{\text{Mc}}$ | 1.6526/1.6749       |
| 3     | 0.182345       | $(331)_{\text{po(mon)}}$              | 1.8186              |
| 4     | 0.16322        | $(311)_{\text{py}}$                   | 1.6330              |
| 5     | 0.163644       | $(311)_{\text{py}}$                   | 1.6330              |
| 6     | 0.182333       | $(331)_{\text{po(mon)}}$              | 1.8186              |
| 7     | 0.165893       | $(222)_{\text{py}}/(130)_{\text{Mc}}$ | 1.6526/1.6749       |



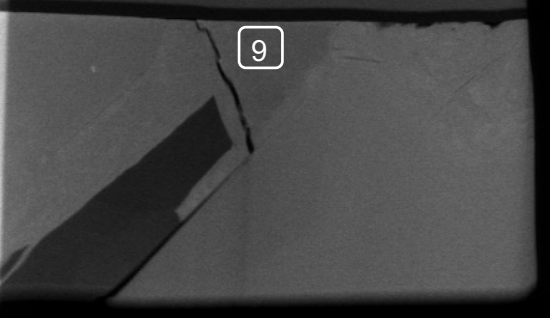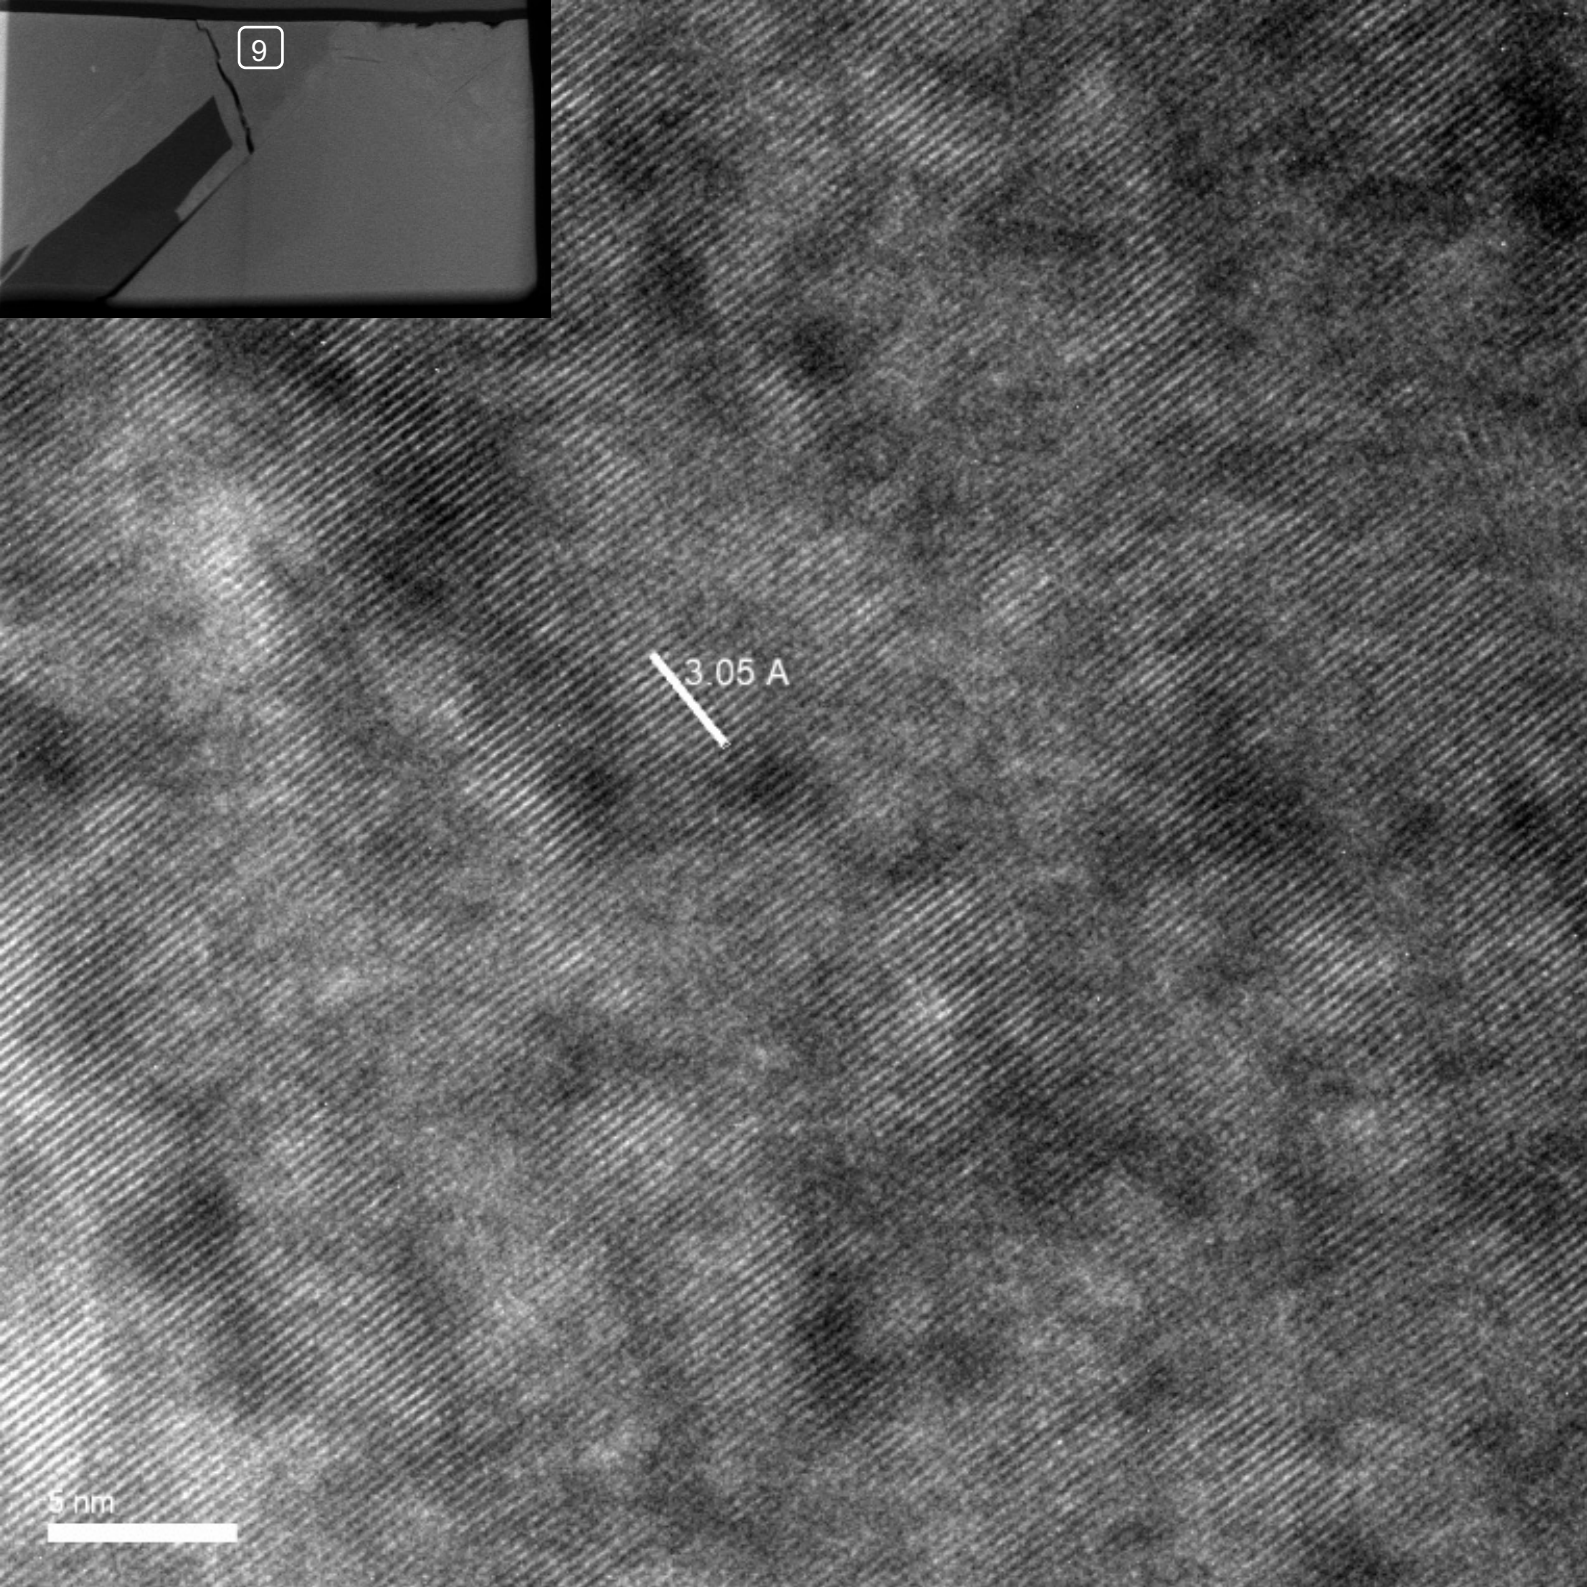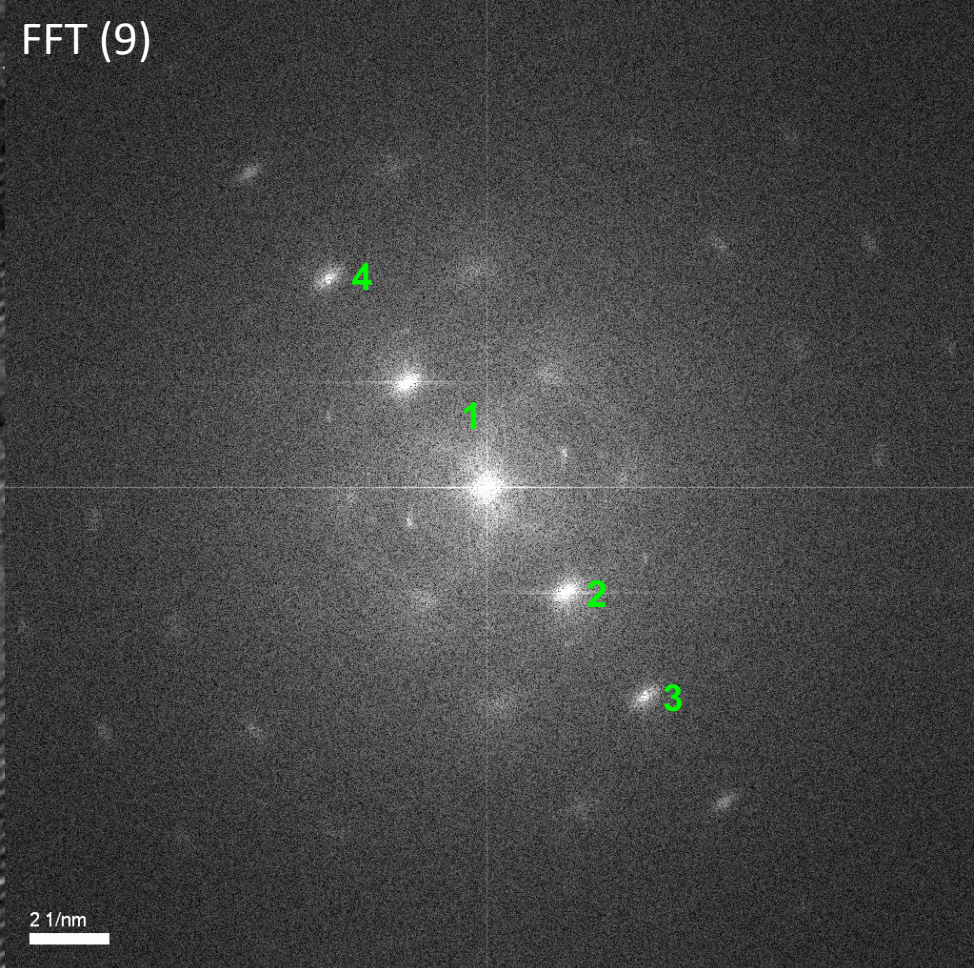

| Chalcopyrite (tetragonal; $I\bar{4}2d$ ) |                |       |                     |  |
|------------------------------------------|----------------|-------|---------------------|--|
| Spot#                                    | d-Spacing (nm) | (hkl) | Ideal d-Spacing (Å) |  |
| 1                                        | 0.30841        | (112) | 3.0387              |  |
| 2                                        | 0.304984       | (112) | 3.0387              |  |
| 3                                        | 0.152778       | (224) | 1.519               |  |
| 4                                        | 0.153576       | (224) | 1.519               |  |



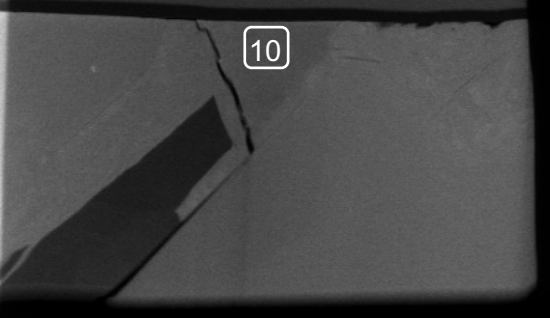

3.05 Å

5 nm

FFT (10)

2 1/nm

Chalcopyrite (tetragonal; I42d)

| Spot# | d-Spacing (nm) | (hkl) | Ideal d-Spacing (Å) |
|-------|----------------|-------|---------------------|
| 1     | 0.305258       | (112) | 3.0387              |
| 2     | 0.305802       | (112) | 3.0387              |
| 3     | 0.154459       | (224) | 1.519               |
| 4     | 0.153537       | (224) | 1.519               |



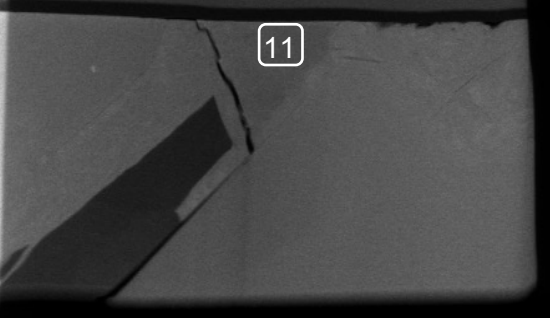

3.05 Å - 3.06 Å

FFT (11)

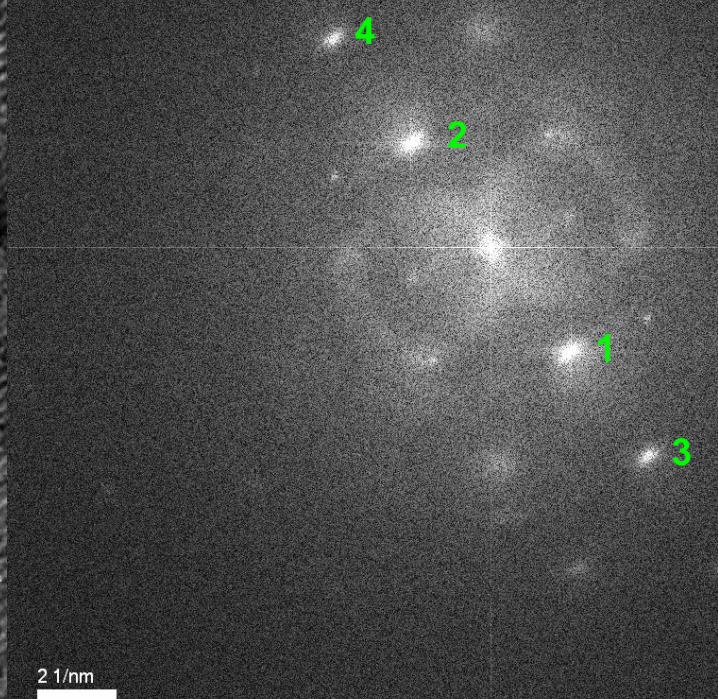

2 1/nm

5 nm

| Chalcopyrite (tetragonal; $I4_2d$ ) |                |       |                     |  |
|-------------------------------------|----------------|-------|---------------------|--|
| Spot#                               | d-Spacing (nm) | (hkl) | Ideal d-Spacing (Å) |  |
| 1                                   | 0.303757       | (112) | 3.0387              |  |
| 2                                   | 0.306955       | (112) | 3.0387              |  |
| 3                                   | 0.153533       | (224) | 1.519               |  |
| 4                                   | 0.154323       | (224) | 1.519               |  |



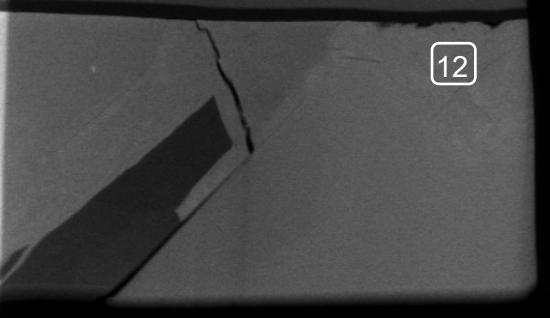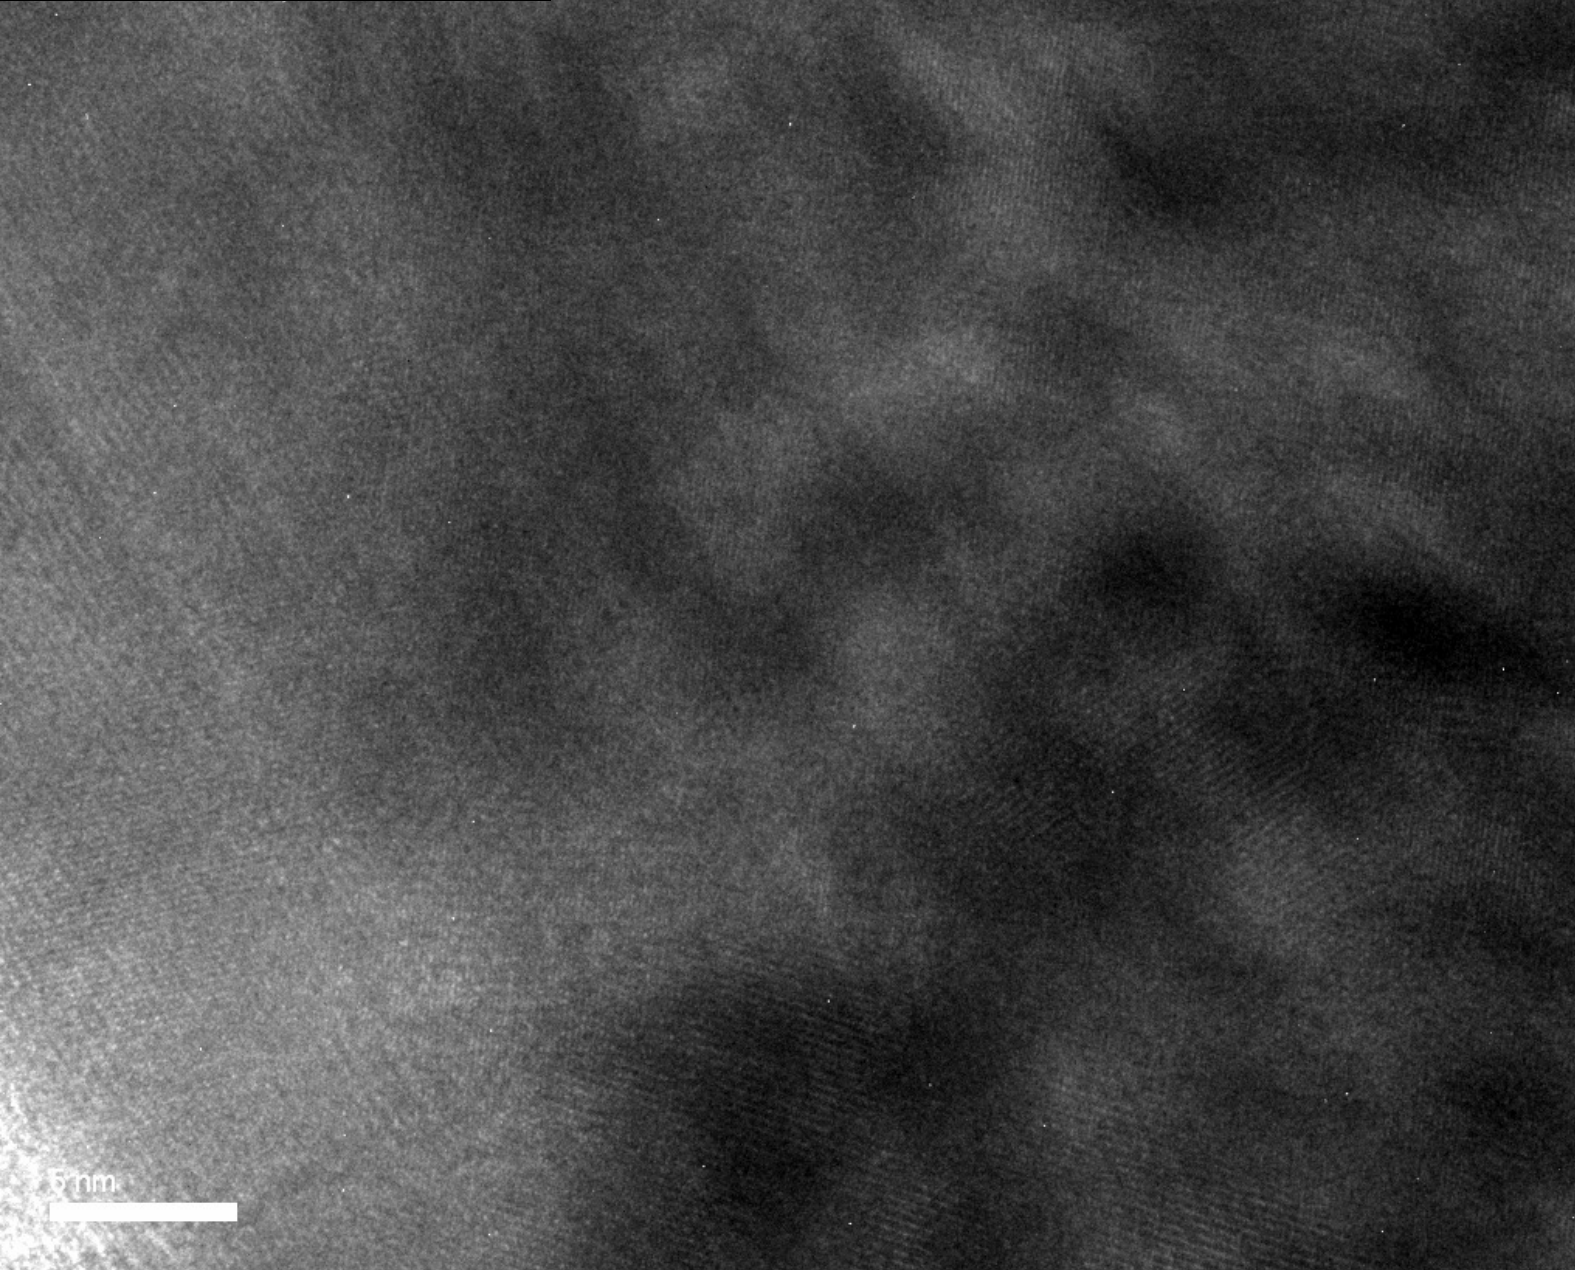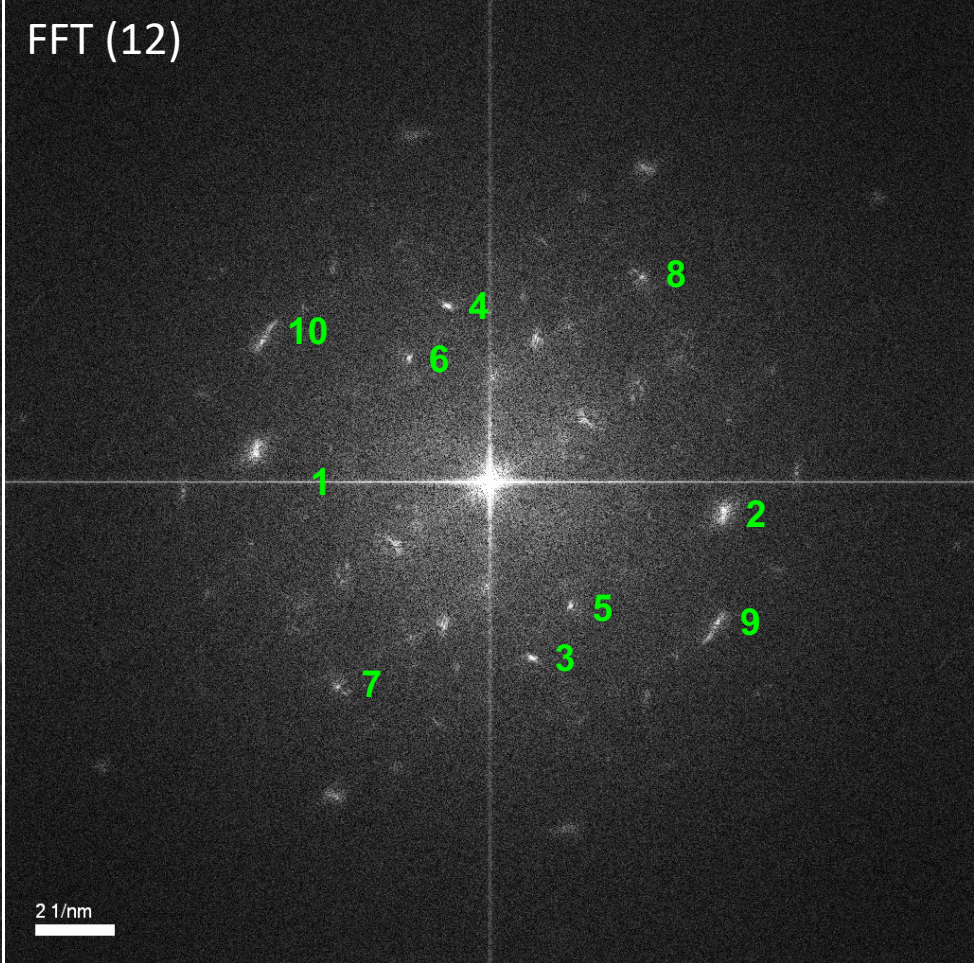

Pyrite ( $\text{FeS}_2$ ) (cubic; P3a)

Marcasite ( $\text{FeS}_2$ ) (orthorrombic; Pnnm)

Goethite ( $\text{FeOOH}$ ) (orthorrombic; Pbnm)

| Spot# | d-Spacing (nm) | (hkl)                                     | Ideal d-Spacing (Å) |
|-------|----------------|-------------------------------------------|---------------------|
| 1     | 0.170873       | (212) <sub>Ght</sub>                      | 1.7111              |
| 2     | 0.170595       | (212) <sub>Ght</sub>                      | 1.7111              |
| 3     | 0.219867       | (112) <sub>Py</sub> /(211) <sub>py</sub>  | 2.2111              |
| 4     | 0.221872       | (112) <sub>Py</sub> /(211) <sub>py</sub>  | 2.2111              |
| 5     | 0.2686         | (130) <sub>Ght</sub>                      | 2.7024              |
| 6     | 0.272061       | (130) <sub>Ght</sub>                      | 2.7024              |
| 7     | 0.156059       | (222) <sub>py</sub>                       | 1.5635              |
| 8     | 0.157067       | (222) <sub>py</sub>                       | 1.5635              |
| 9     | 0.149724       | (302) <sub>py</sub> /(131) <sub>mc.</sub> | 1.5021 /1.5033      |
| 10    | 0.150079       | (302) <sub>py</sub> /(131) <sub>mc.</sub> | 1.5021 /1.5033      |



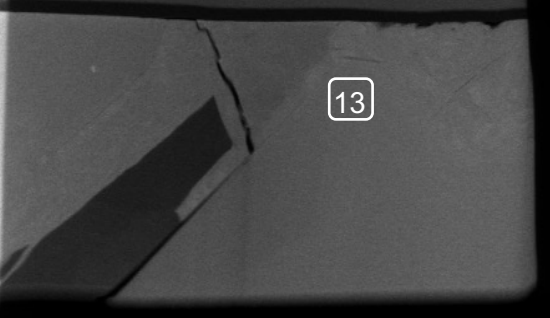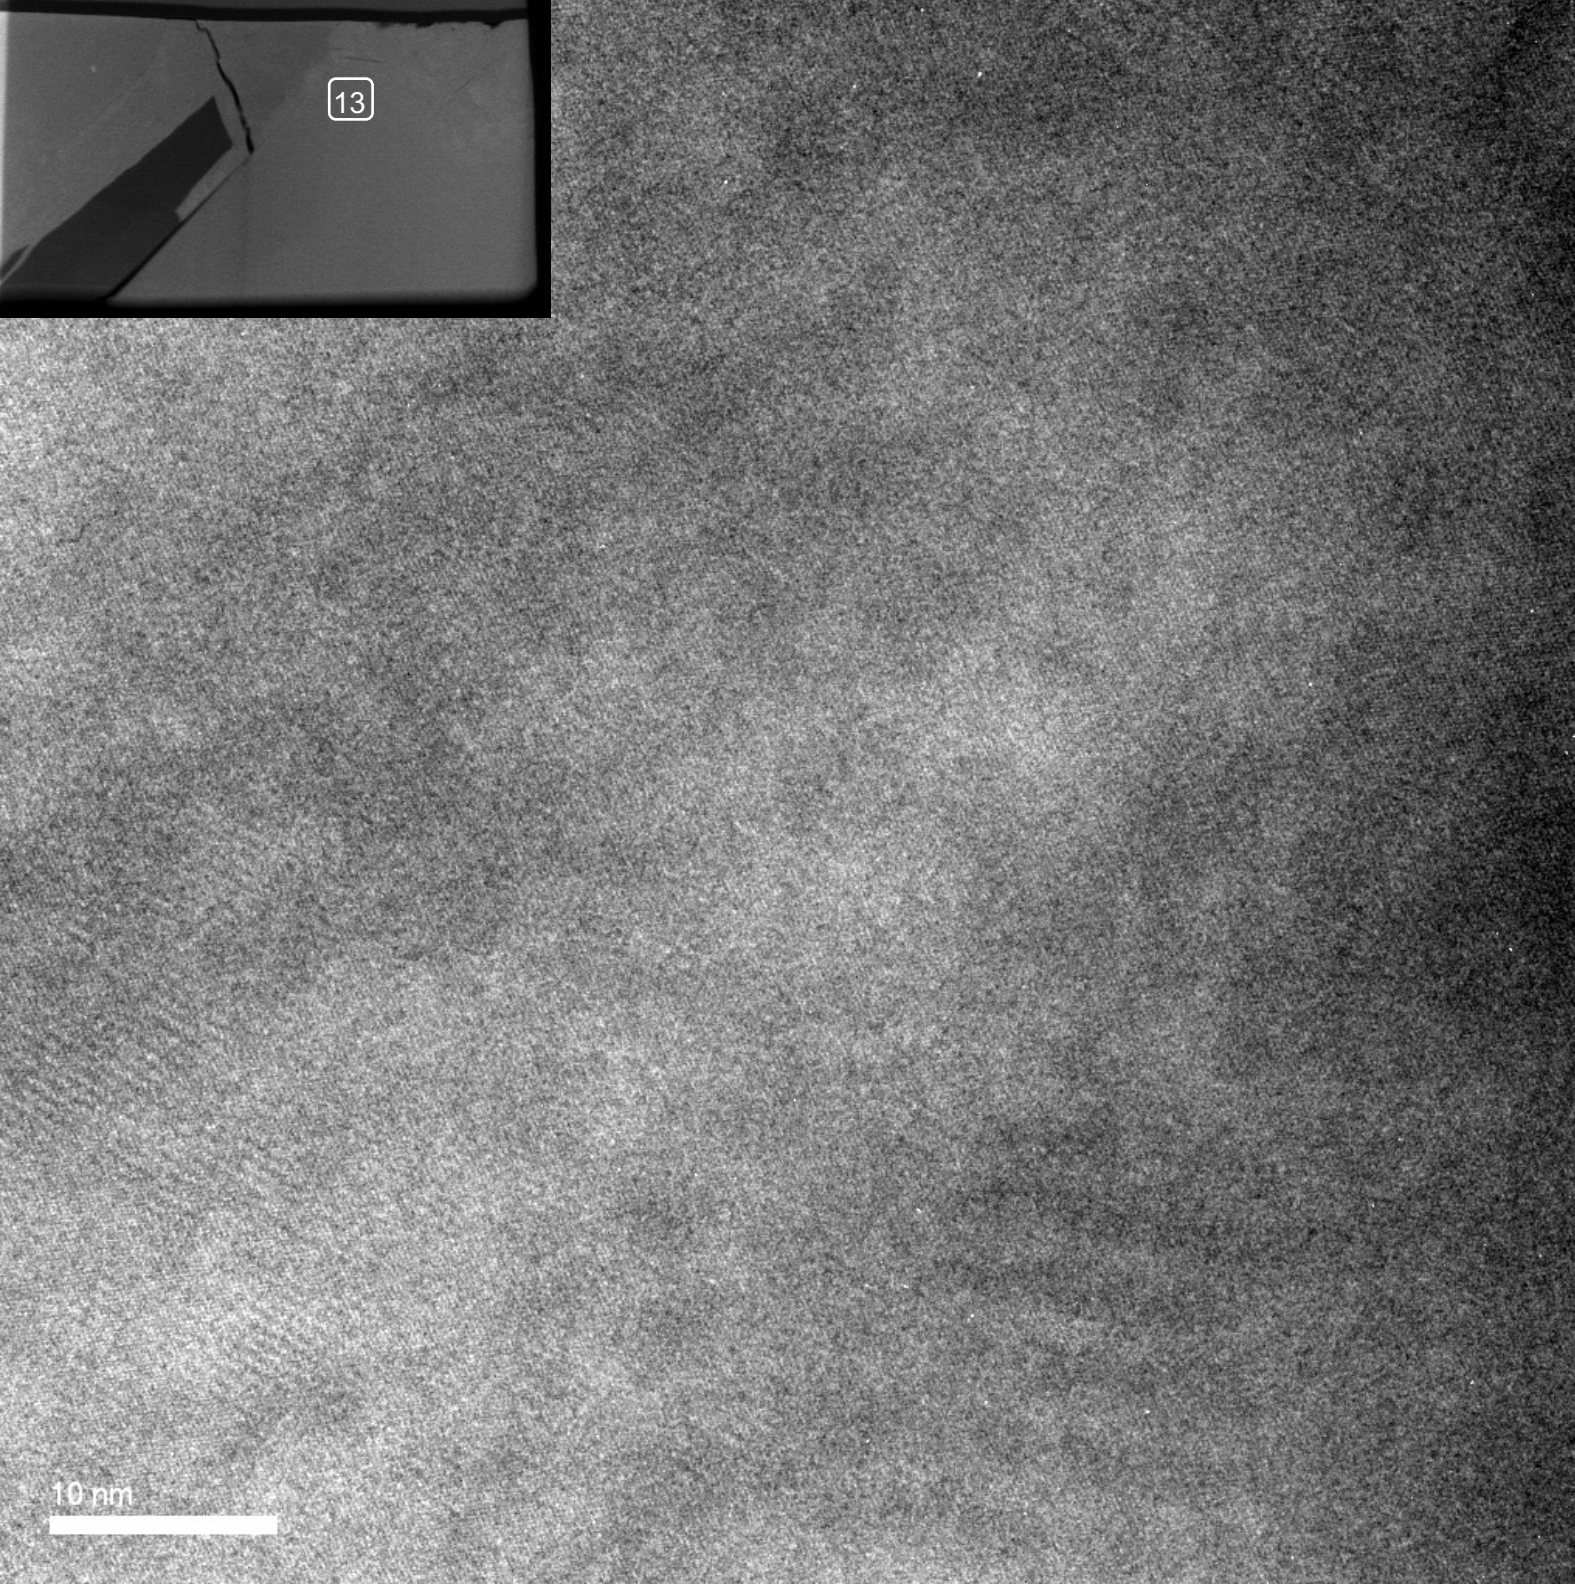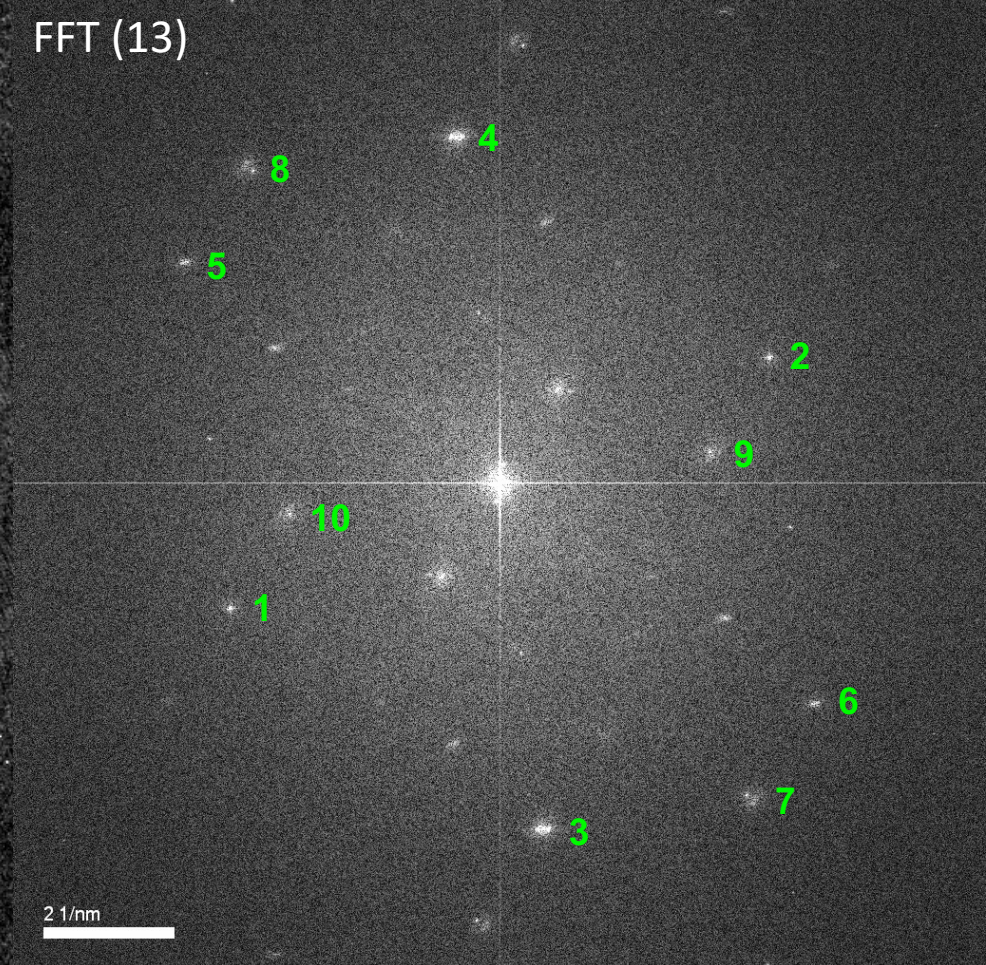

| Pyrite (FeS <sub>2</sub> ) (cubic; P3a)            |                |                                          |                     |
|----------------------------------------------------|----------------|------------------------------------------|---------------------|
| Marcasite (FeS <sub>2</sub> ) (orthorrombic; Pnnm) |                |                                          |                     |
| Spot#                                              | d-Spacing (nm) | (hkl)                                    | Ideal d-Spacing (Å) |
| 1                                                  | 0.222183       | (112) <sub>Py</sub> /(211) <sub>Py</sub> | 2.2113              |
| 2                                                  | 0.222745       | (112) <sub>Py</sub> /(211) <sub>Py</sub> | 2.2113              |
| 3                                                  | 0.189415       | (221) <sub>Py</sub>                      | 1.9083              |
| 4                                                  | 0.190405       | (221) <sub>Py</sub>                      | 1.9083              |
| 5                                                  | 0.172968       | (311) <sub>Py</sub>                      | 1.7261              |
| 6                                                  | 0.172563       | (311) <sub>Py</sub>                      | 1.7261              |
| 7                                                  | 0.16583        | (222) <sub>py</sub> /(130) <sub>Mc</sub> | 1.6526/1.6749       |
| 8                                                  | 0.166377       | (222) <sub>py</sub> /(130) <sub>Mc</sub> | 1.6526/1.6749       |
| 9                                                  | 0.310671       | (310) <sub>Po(mon)</sub>                 | 3.1093-3.1264       |
| 10                                                 | 0.310298       | (310) <sub>Po(mon)</sub>                 | 3.1093-3.1264       |



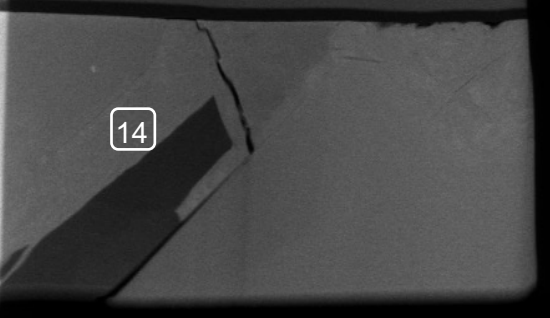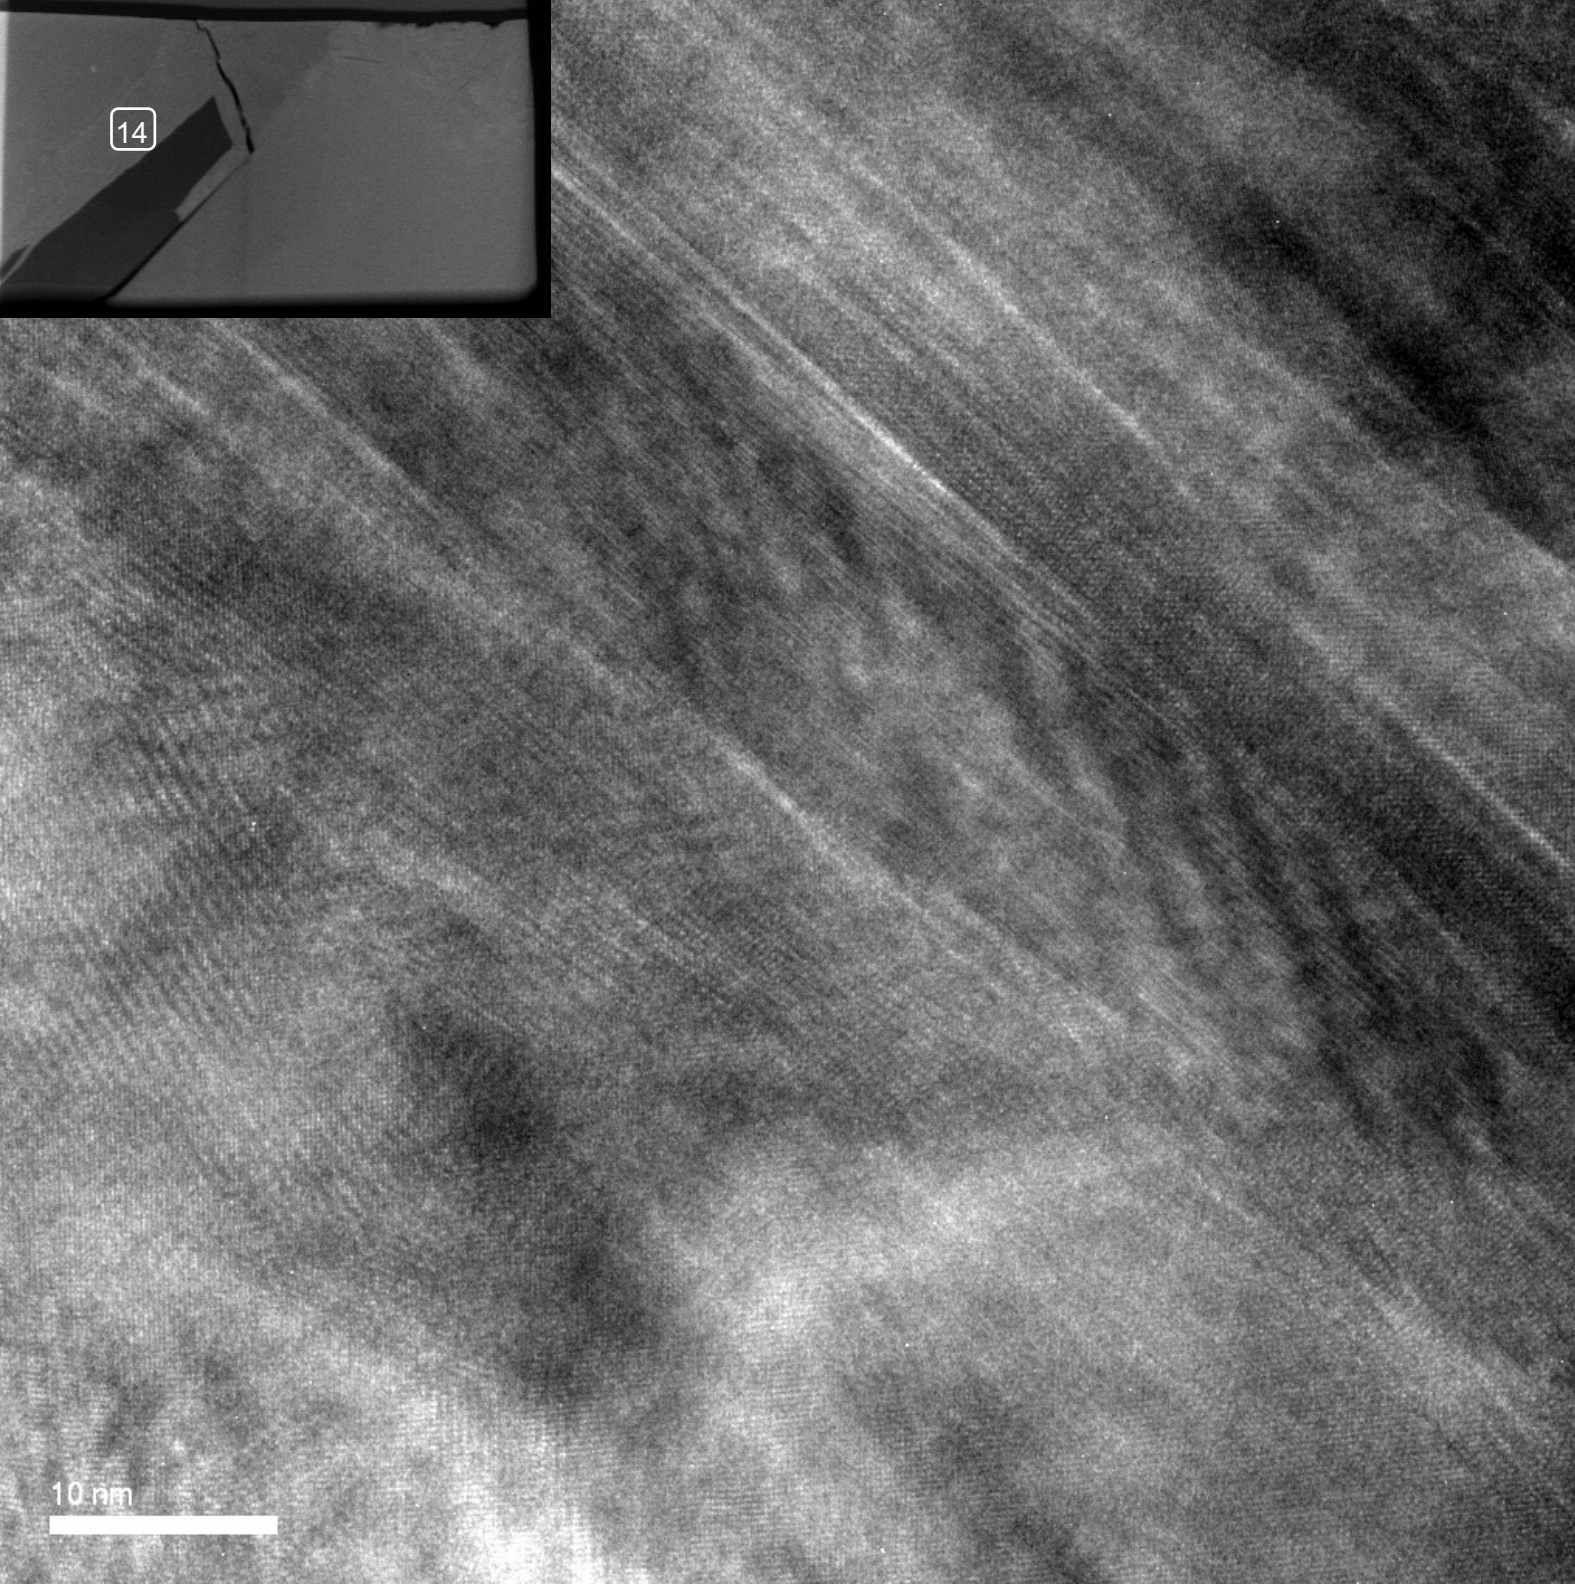

FFT (14)

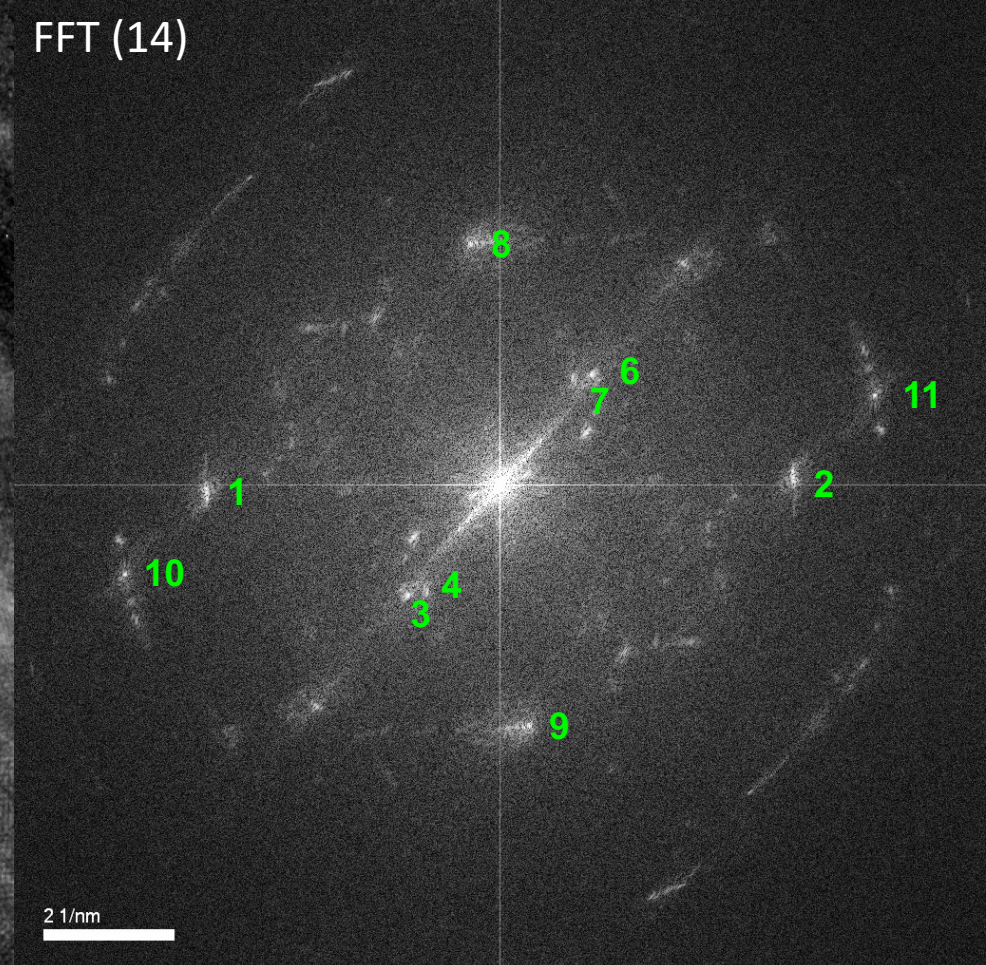

Goethite (FeOOH) (orthorrombic; Pbnm)

| Spot# | d-Spacing (nm) | (hkl) | Ideal d-Spacing (Å) |
|-------|----------------|-------|---------------------|
| 1     | 0.225386       | (210) | 2.2529              |
| 2     | 0.224706       | (210) | 2.2529              |
| 3     | 0.453354       | {101} | 4.5800              |
| 4     | 0.503457       | {101} | 4.5800              |
| 6     | 0.458735       | {101} | 4.5800              |
| 7     | 0.509174       | {101} | 4.5800              |
| 8     | 0.272951       | (130) | 2.7024              |
| 9     | 0.271005       | (130) | 2.7024              |
| 10    | 0.171888       | (212) | 1.7111              |
| 11    | 0.171518       | (212) | 1.7111              |



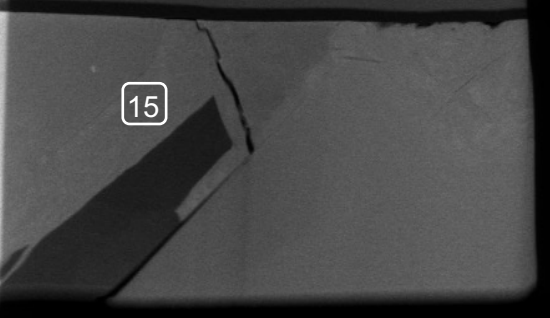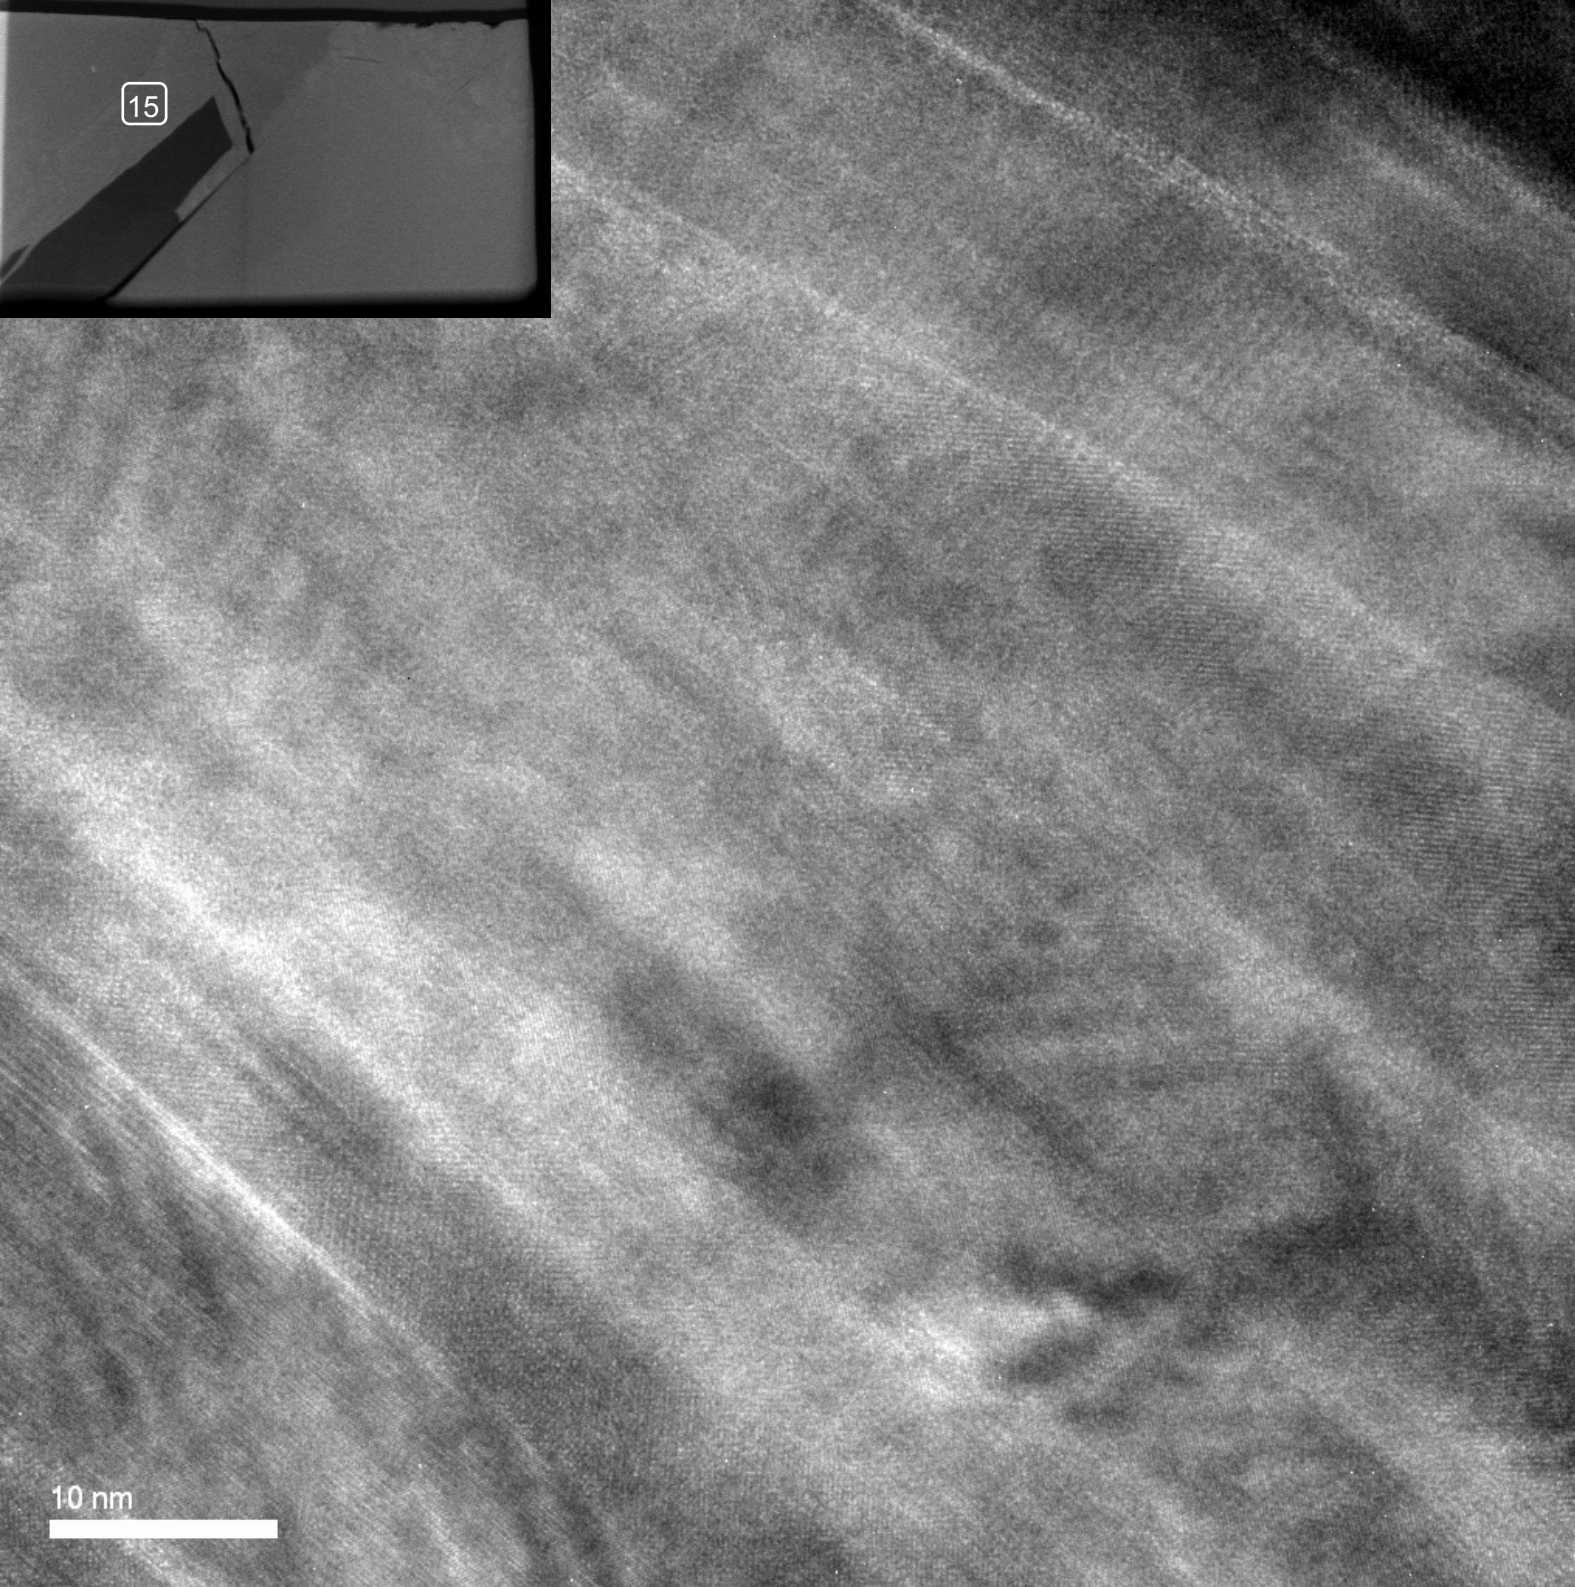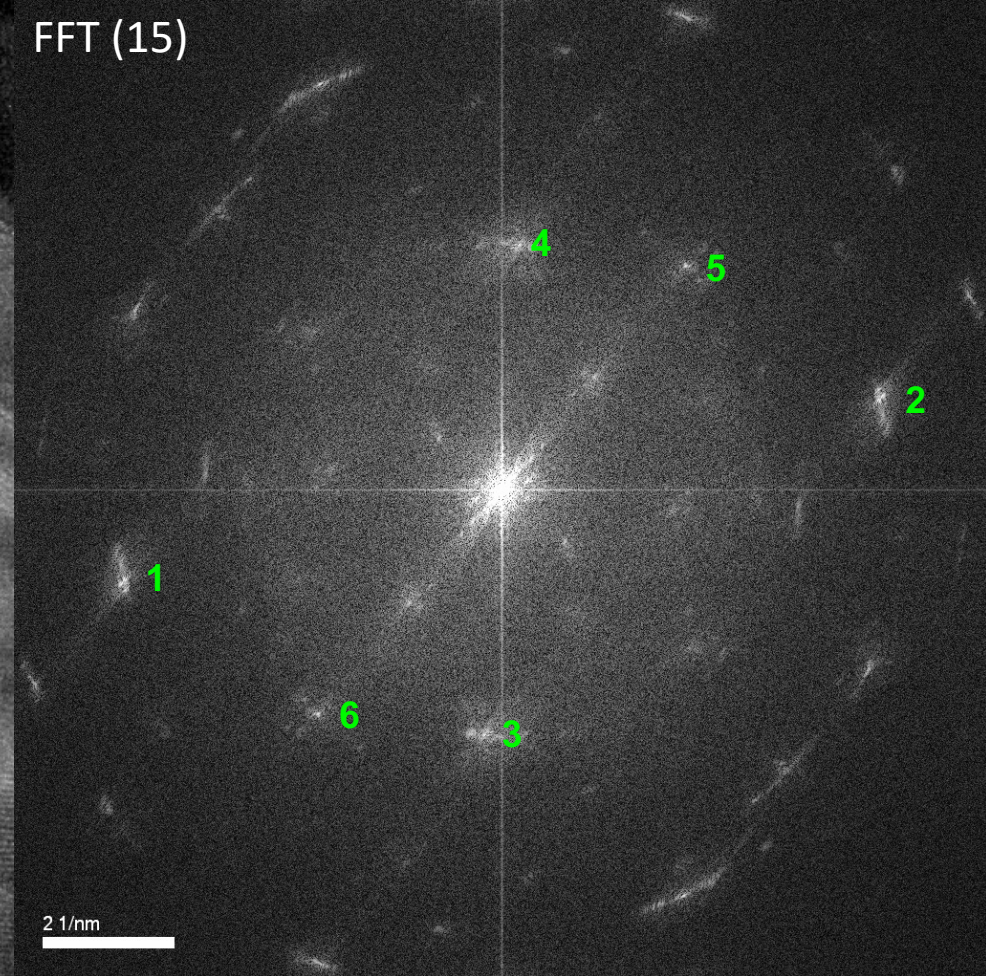

| Goethite (FeOOH) (orthorrombic; Pbnm) |                |       |                     |
|---------------------------------------|----------------|-------|---------------------|
| Spot#                                 | d-Spacing (nm) | (hkl) | Ideal d-Spacing (Å) |
| 1                                     | 0.170351       | (212) | 1.7111              |
| 2                                     | 0.169898       | (212) | 1.7111              |
| 3                                     | 0.27026        | (130) | 2.7024              |
| 4                                     | 0.272051       | (130) | 2.7024              |
| 5                                     | 0.230762       | (200) | 2.2900-2.3125       |
| 6                                     | 0.229574       | (200) | 2.2900-2.3125       |



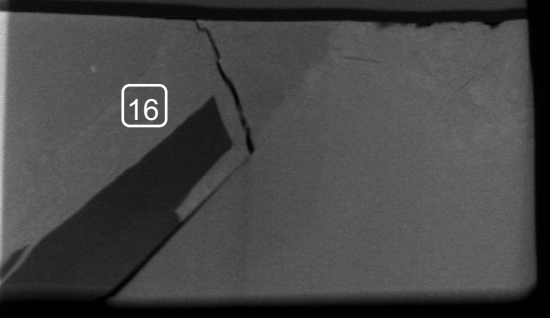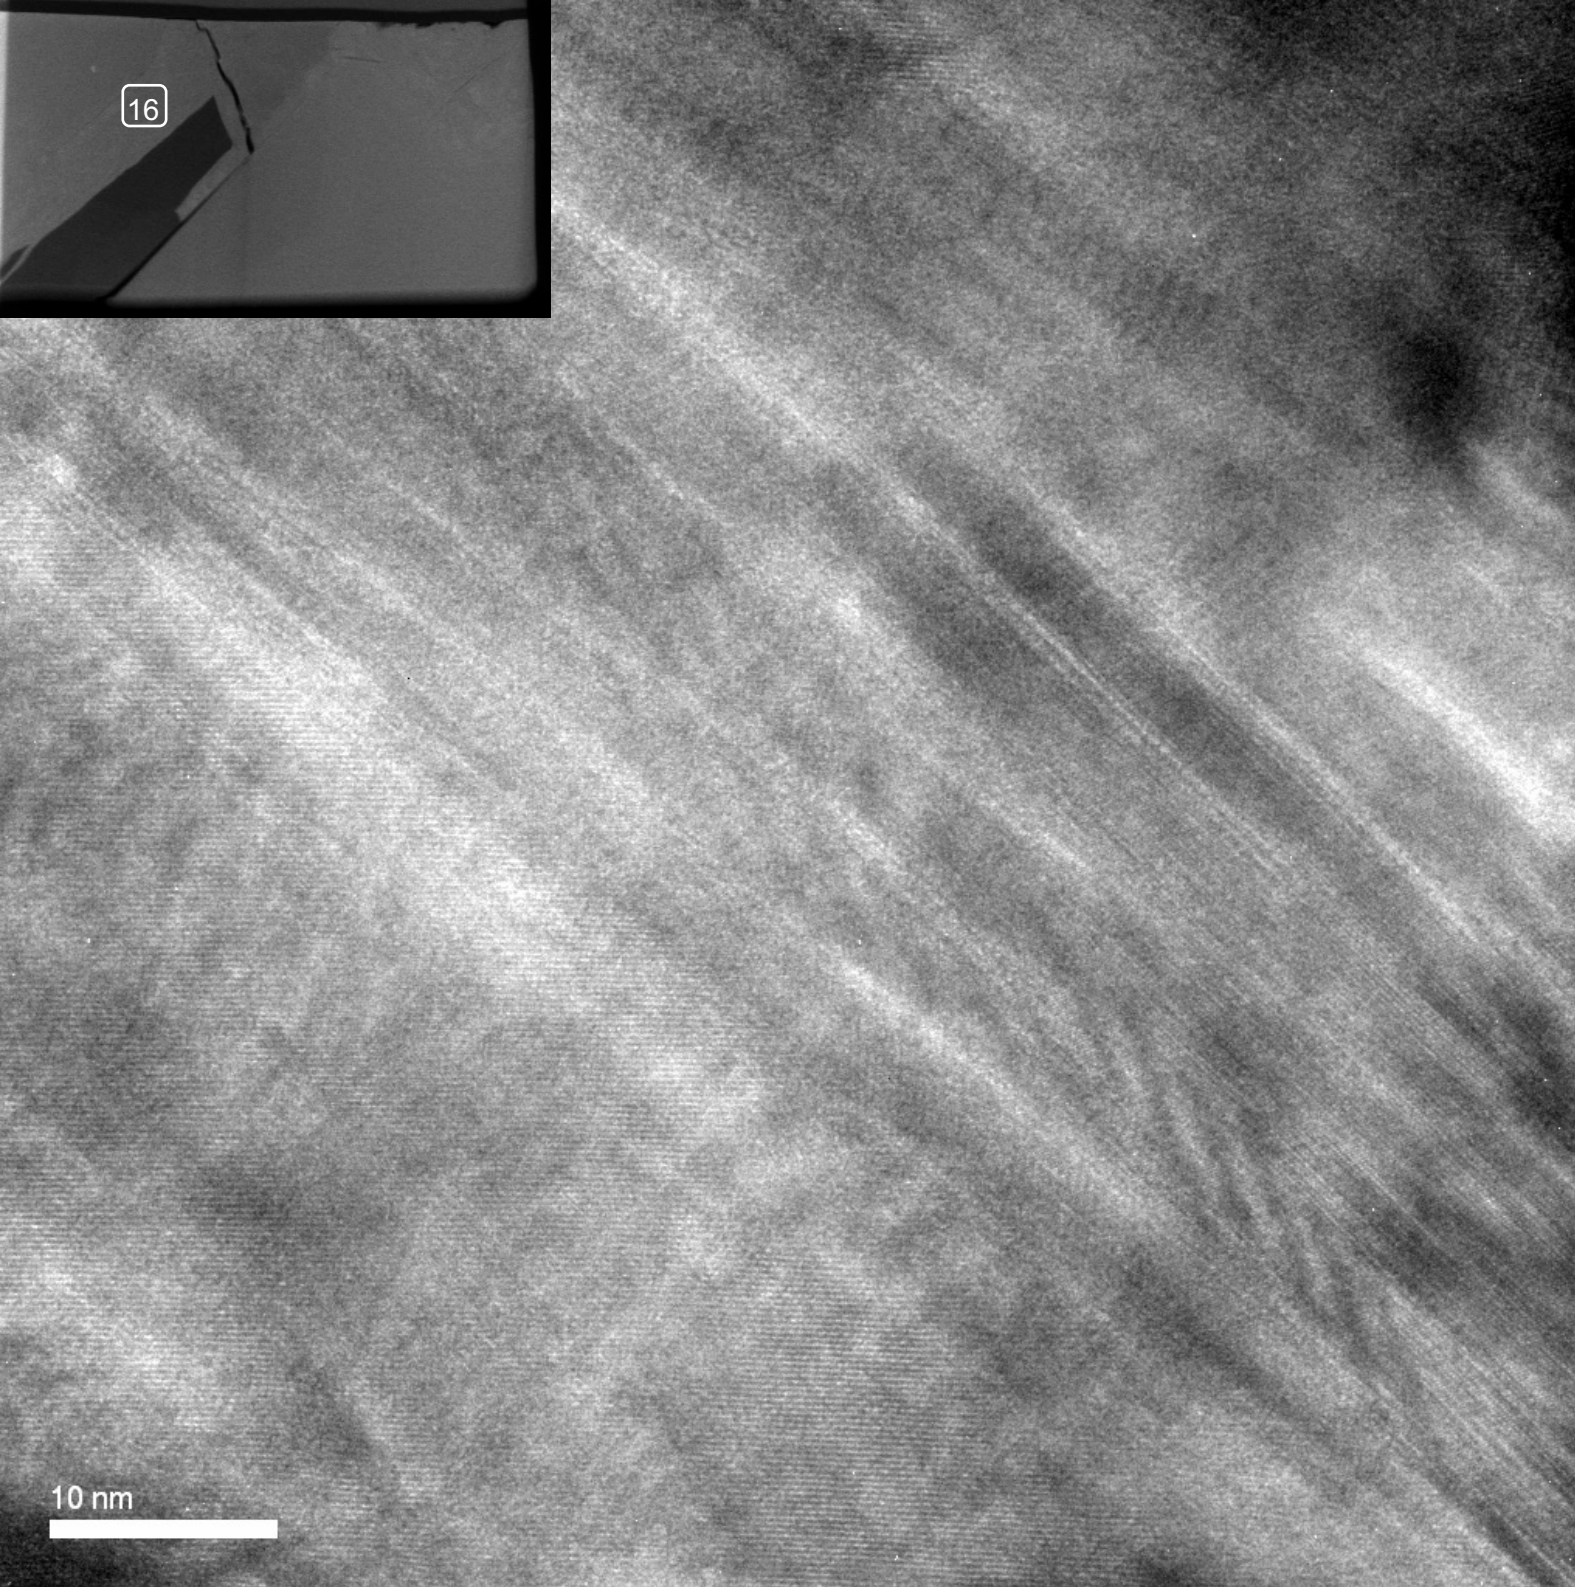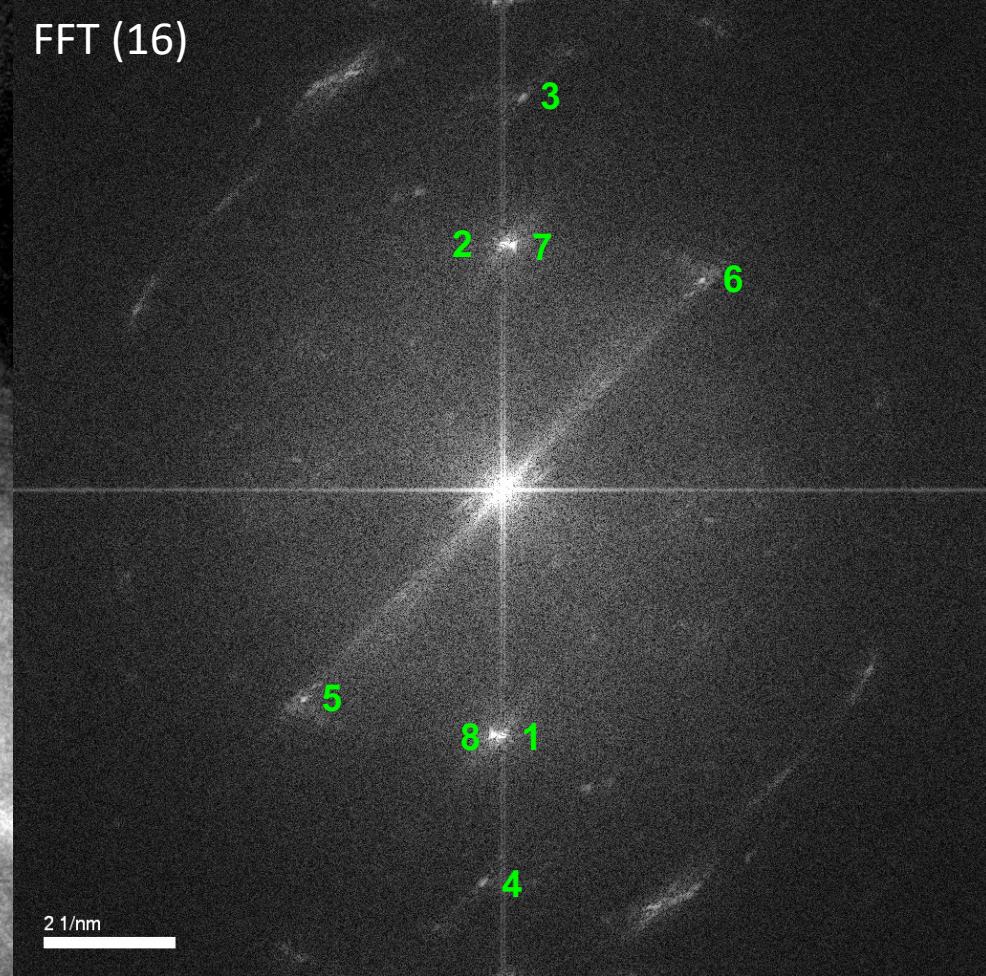

Goethite (FeOOH) (orthorrombic; Pbnm)

| Spot# | d-Spacing (nm) | (hkl) | Ideal d-Spacing (Å) |
|-------|----------------|-------|---------------------|
| 1     | 0.268943       | (130) | 2.7024              |
| 2     | 0.271126       | (130) | 2.7024              |
| 3     | 0.169298       | (240) | 1.6968              |
| 4     | 0.168359       | (240) | 1.6968              |
| 5     | 0.229013       | (200) | 2.2900-2.3125       |
| 6     | 0.230013       | (200) | 2.2900-2.3125       |
| 7     | 0.272211       | (212) | 1.7111              |
| 8     | 0.270066       | (212) | 1.7111              |



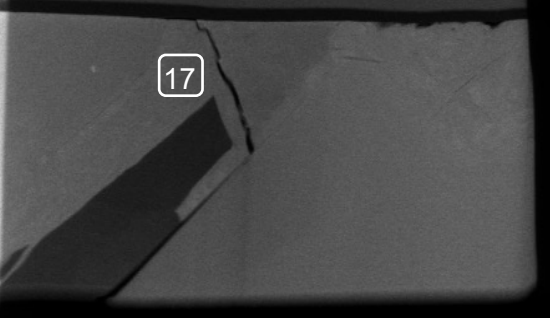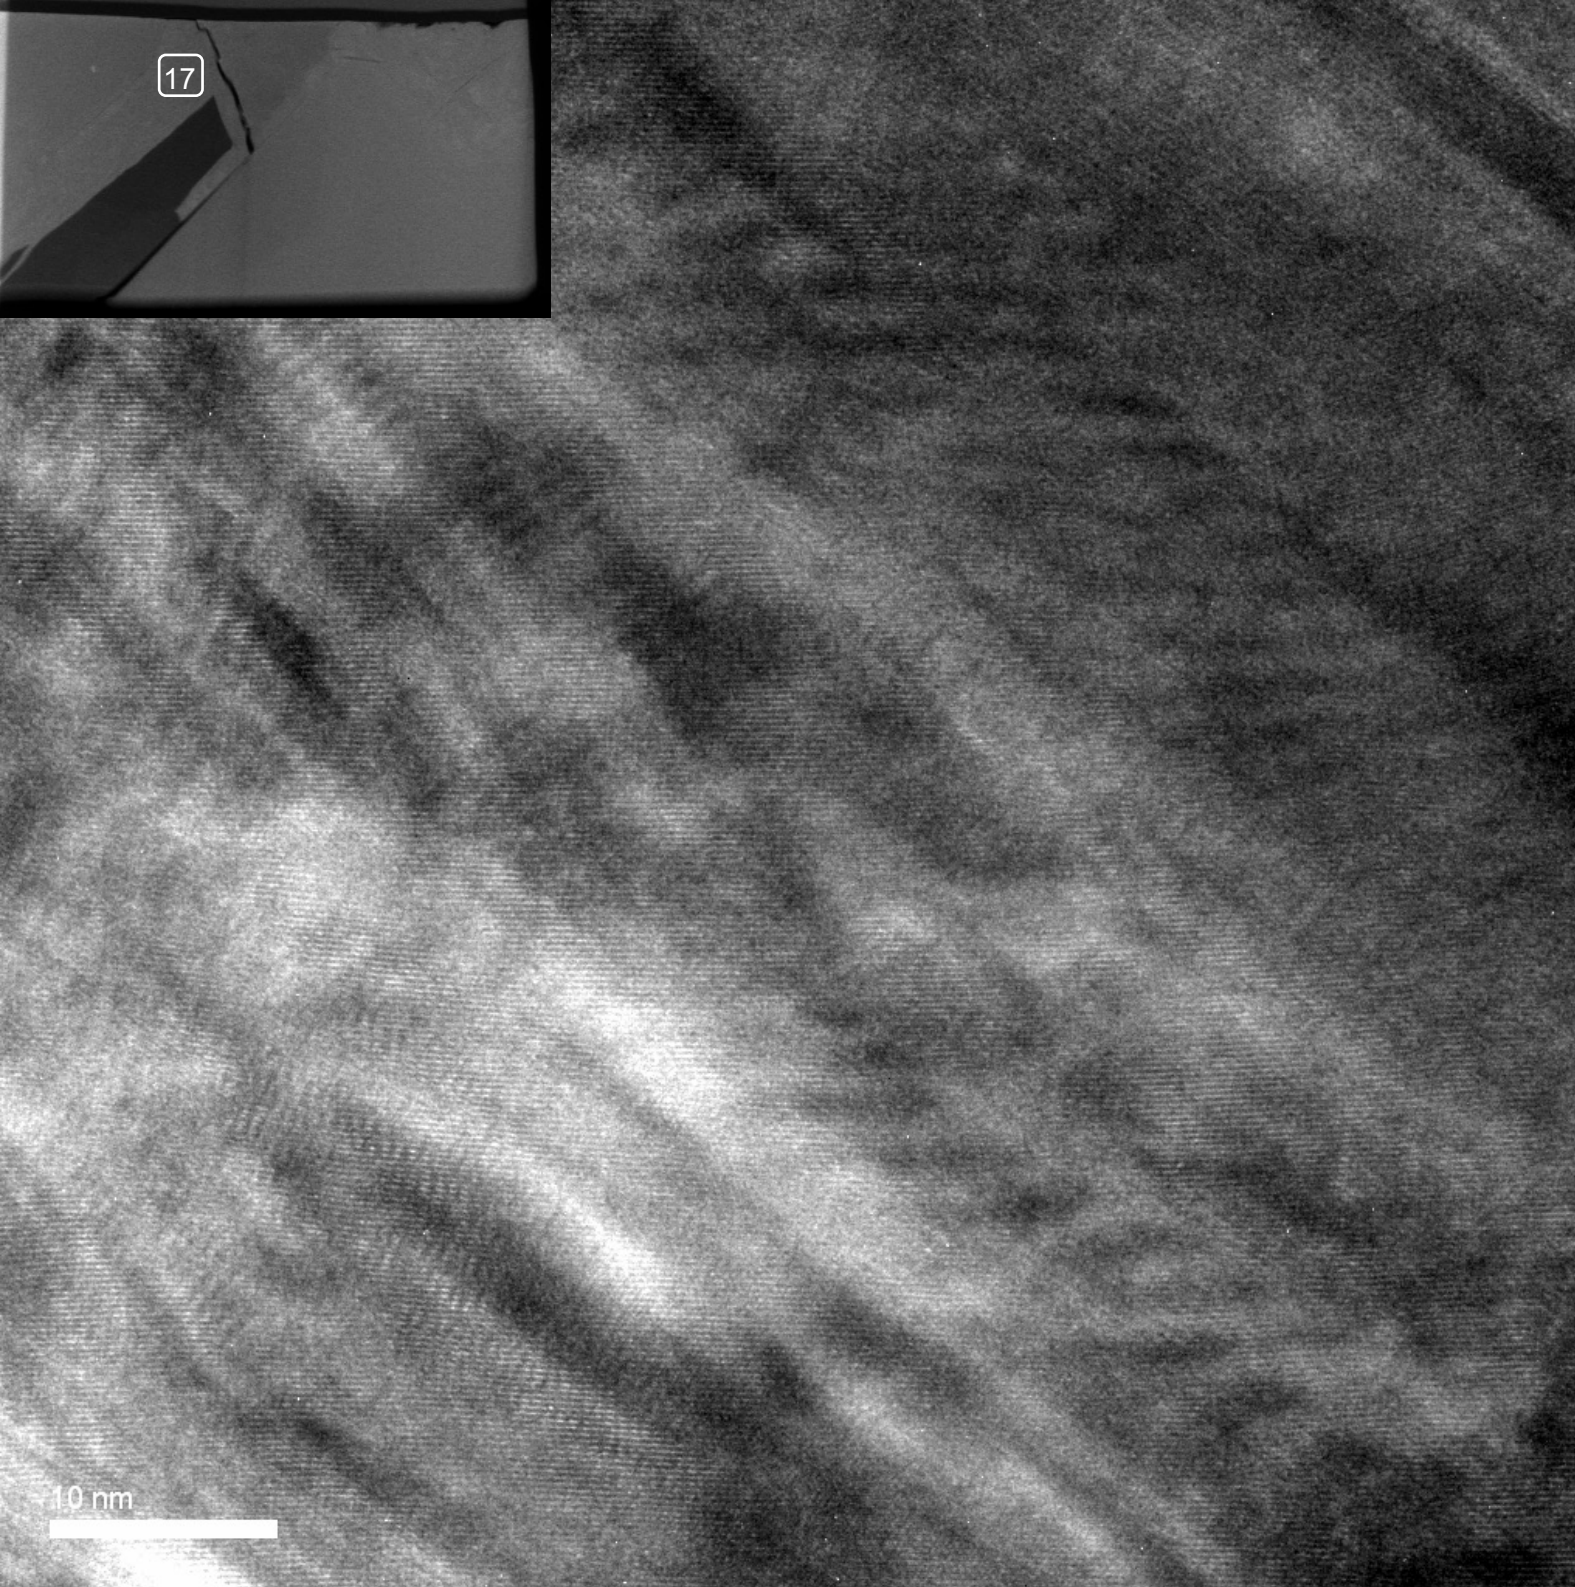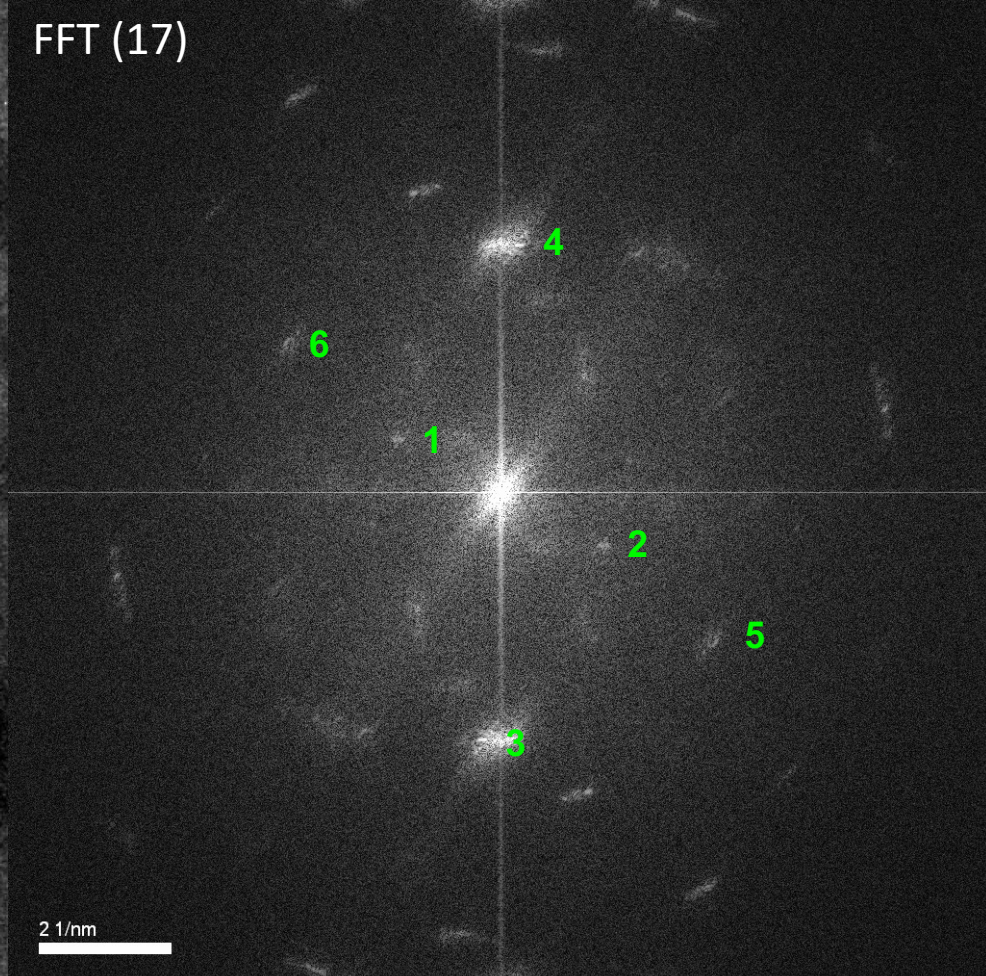

| Goethite (FeOOH) (orthorrombic; Pbnm) |                |               |                     |
|---------------------------------------|----------------|---------------|---------------------|
| Spot#                                 | d-Spacing (nm) | (hkl)         | Ideal d-Spacing (Å) |
| 1                                     | 0.577073       | $(-111)_{po}$ | 5.7478-5.760        |
| 2                                     | 0.572506       | $(-111)_{po}$ | 5.7478-5.760        |
| 3                                     | 0.269435       | (130)         | 2.7024              |
| 4                                     | 0.271848       | (130)         | 2.7024              |
| 5                                     | 0.254559       | (101)         | 2.5386              |
| 6                                     | 0.256408       | (101)         | 2.5386              |



# PEÑA ARPADA (PA-21-3) THIN-FOIL #2

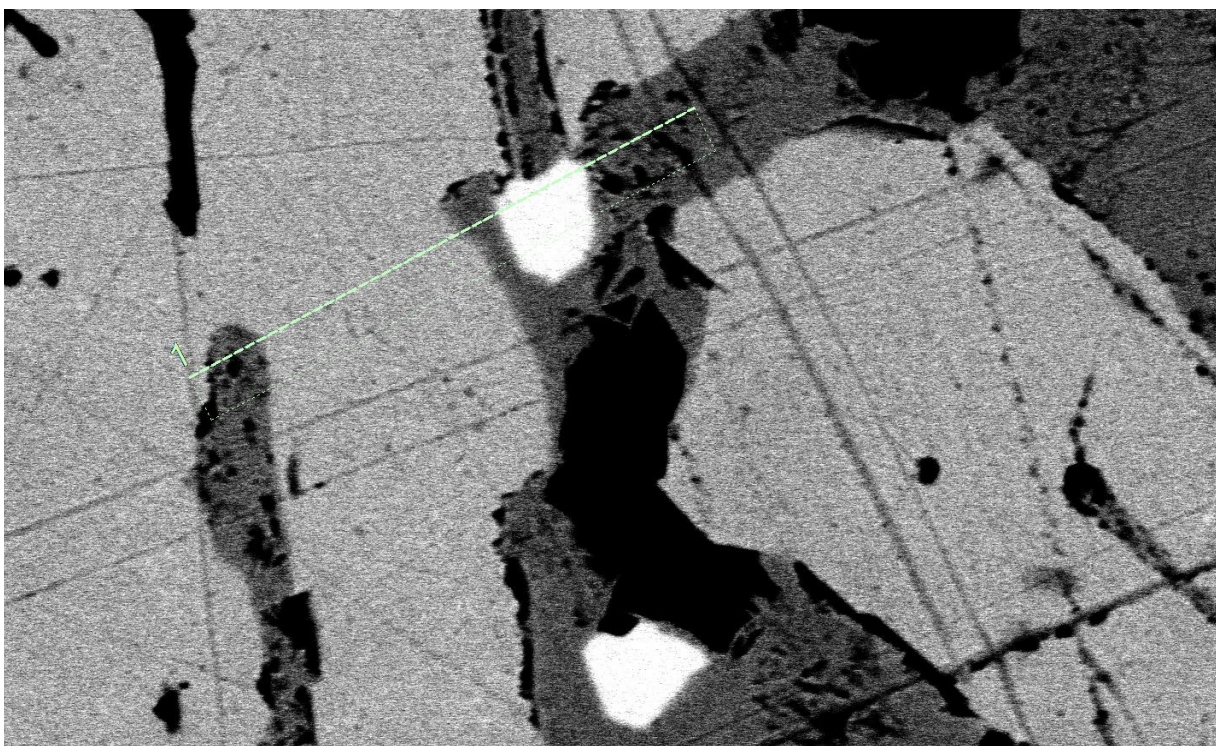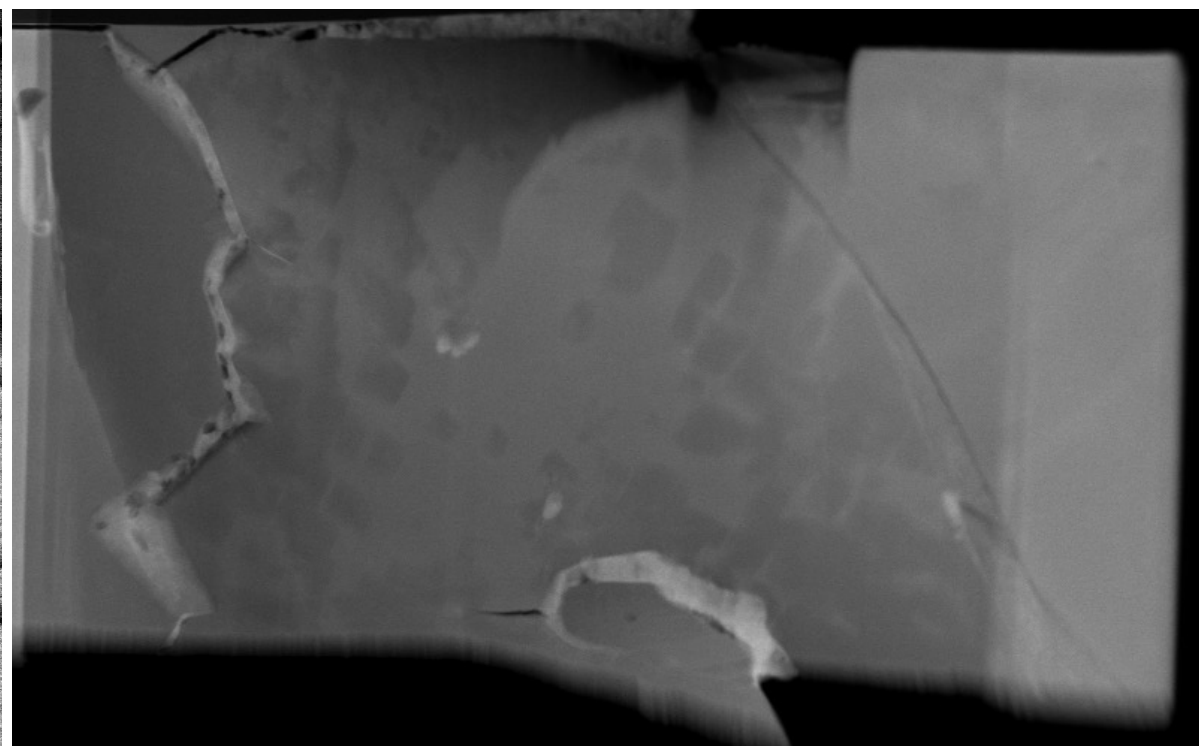



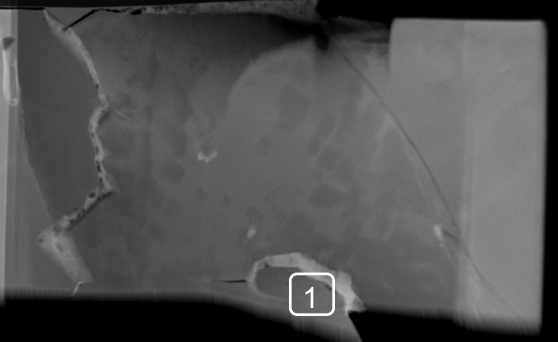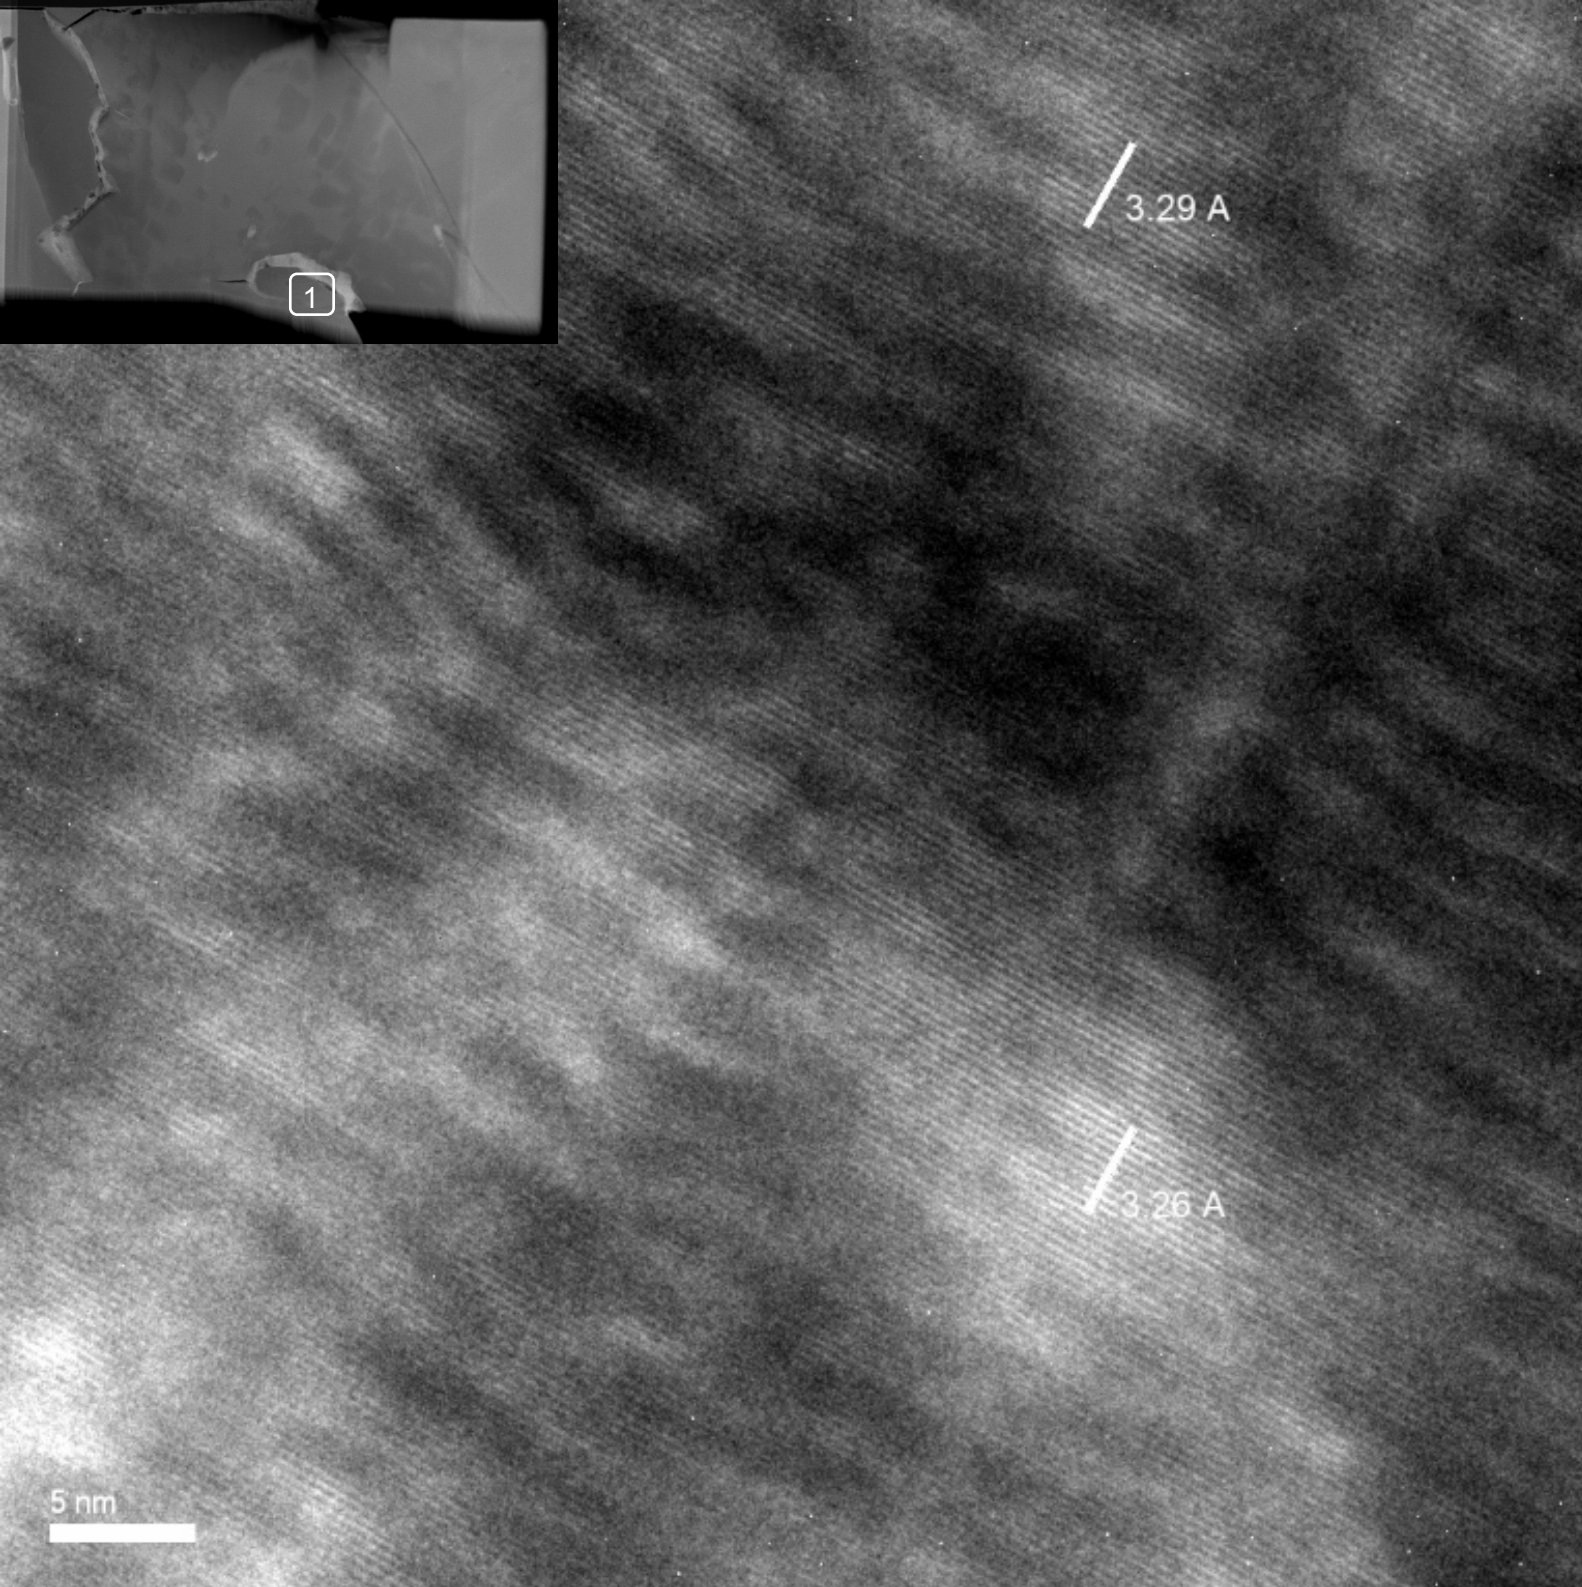

FFT (1)

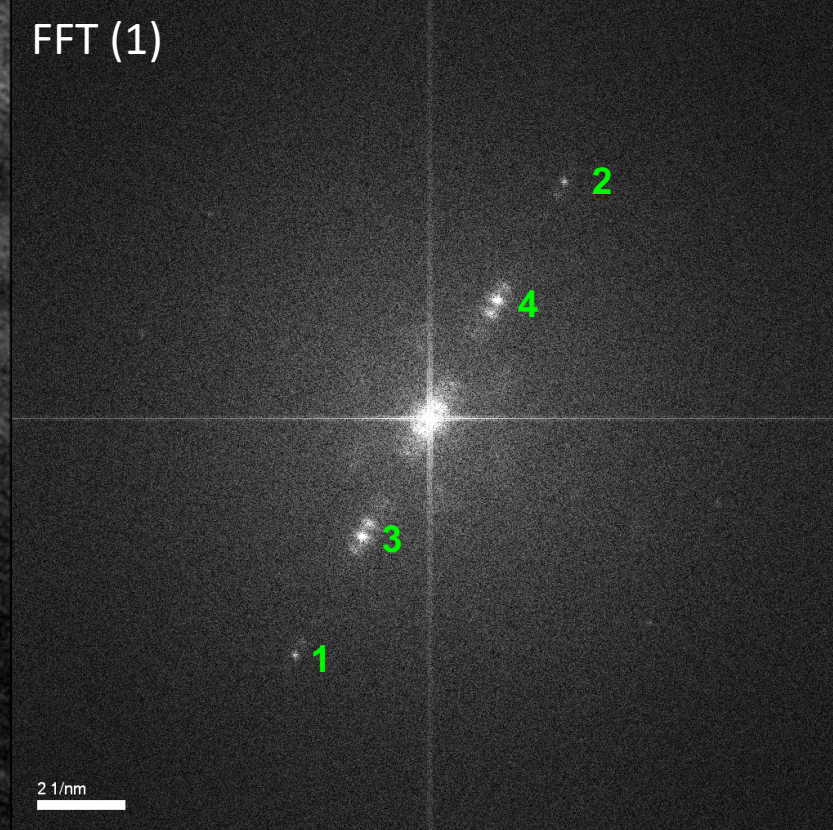

Vaesite (NiS<sub>2</sub>) (cubic; P3a)

| Spot# | d-Spacing (nm) | (hkl) | Ideal d-Spacing (Å) |
|-------|----------------|-------|---------------------|
| 1     | 0.163274       | (222) | 1.6387              |
| 2     | 0.163442       | (222) | 1.6387              |
| 3     | 0.322598       | (111) | 3.2773              |
| 4     | 0.326008       | (111) | 3.2773              |



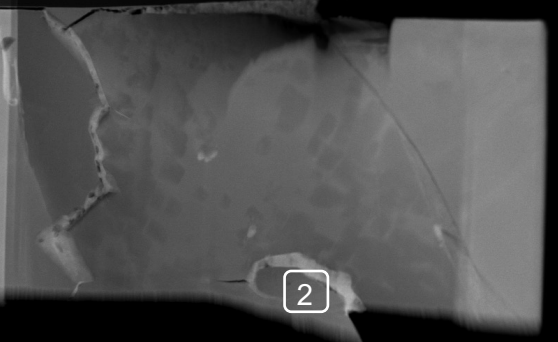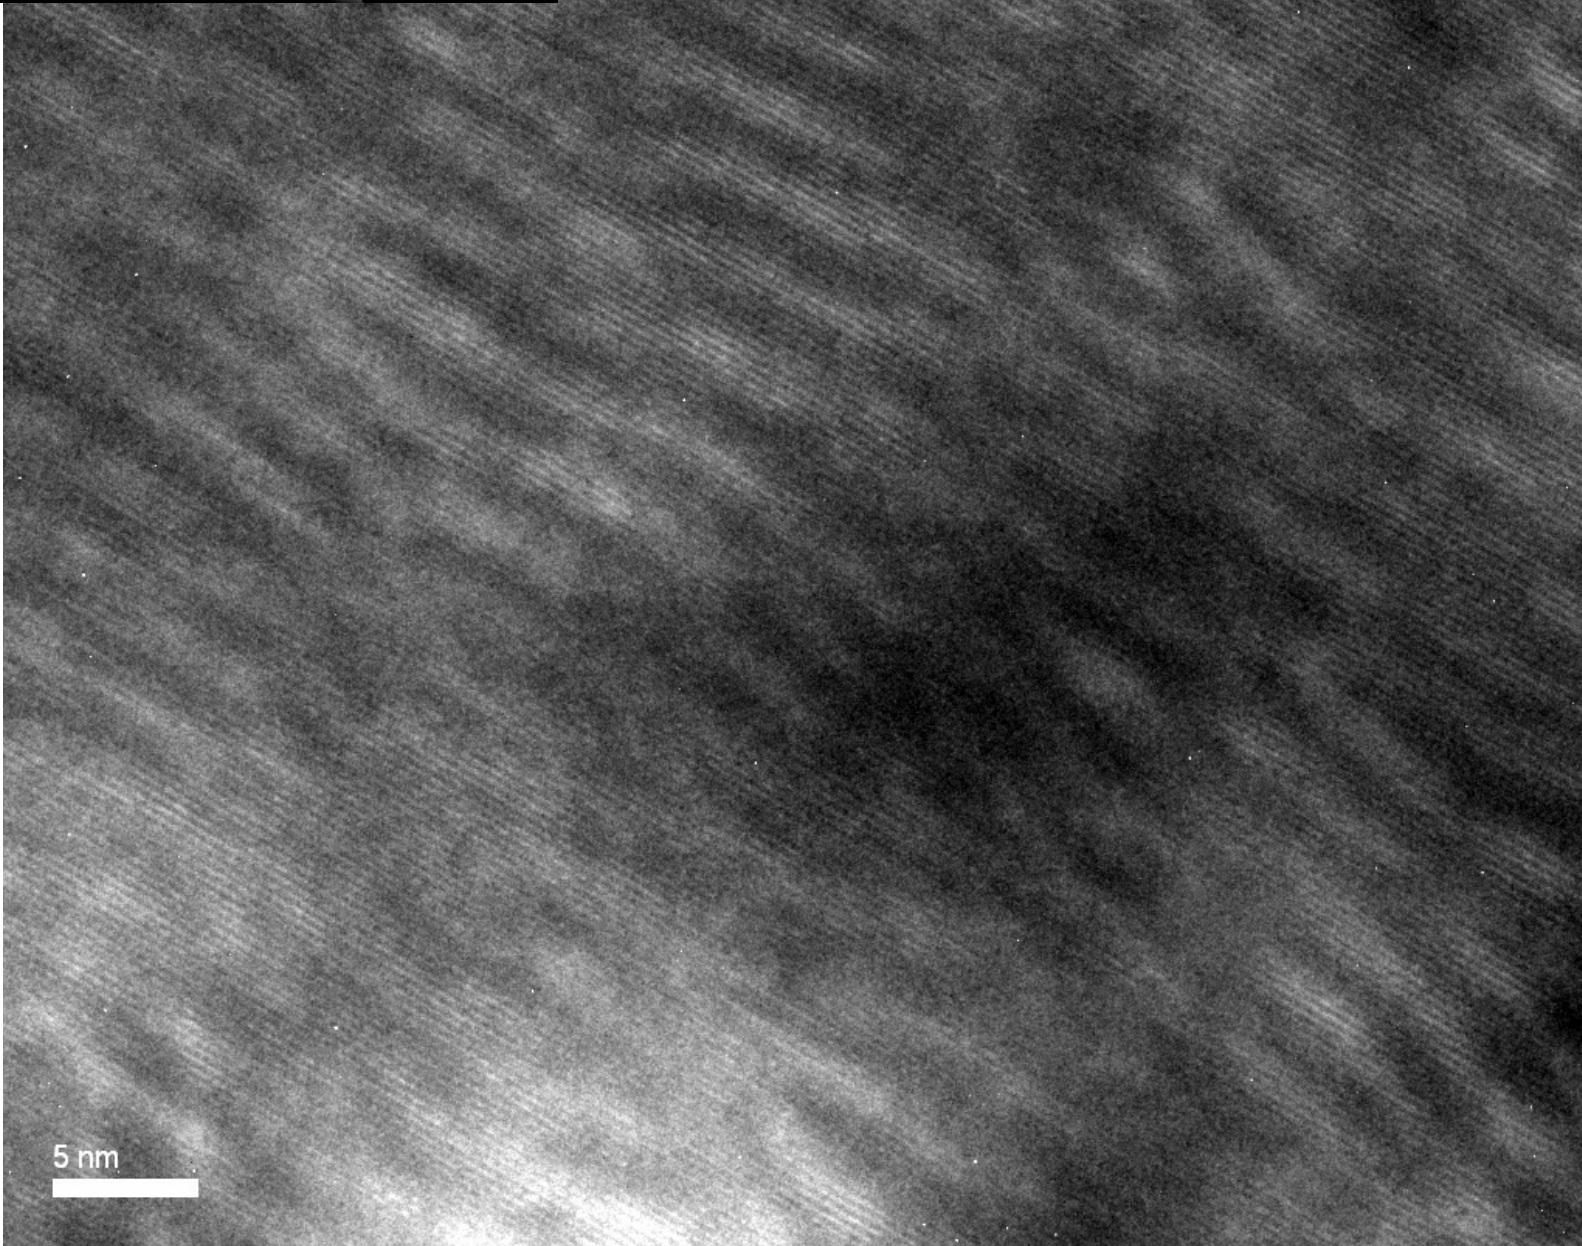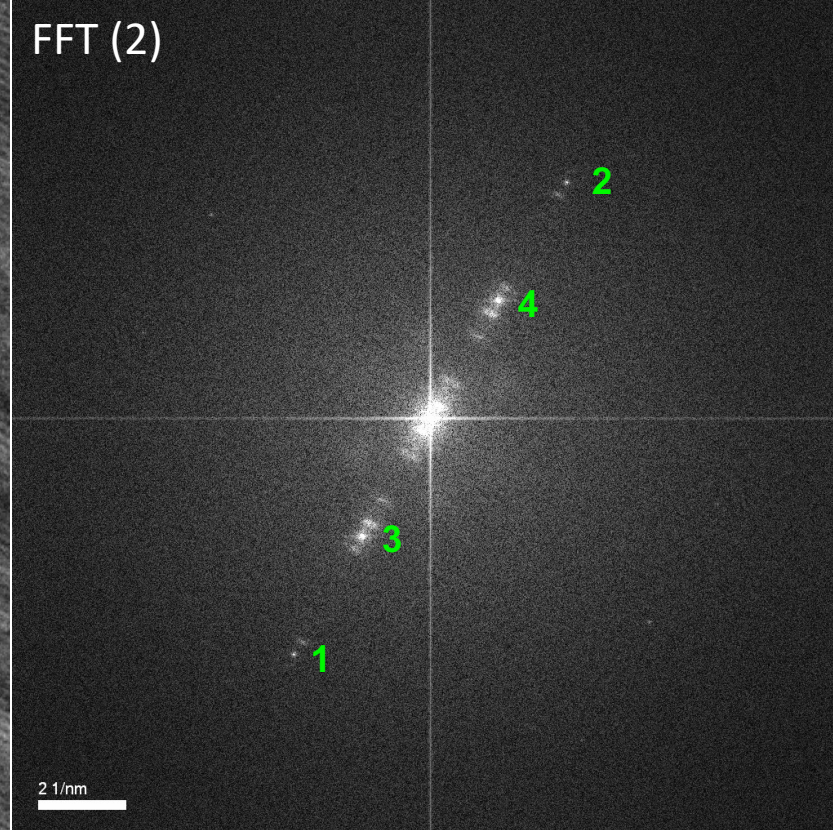

| Vaesite (NiS <sub>2</sub> ) (cubic; P3a) |                |       |                     |
|------------------------------------------|----------------|-------|---------------------|
| Spot#                                    | d-Spacing (nm) | (hkl) | Ideal d-Spacing (Å) |
| 1                                        | 0.162741       | (222) | 1.6387              |
| 2                                        | 0.163621       | (222) | 1.6387              |
| 3                                        | 0.325978       | (111) | 3.2773              |
| 4                                        | 0.326785       | (111) | 3.2773              |



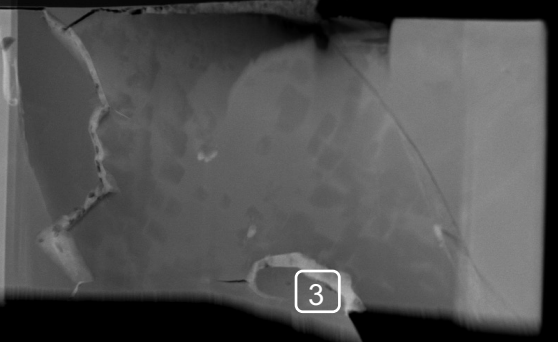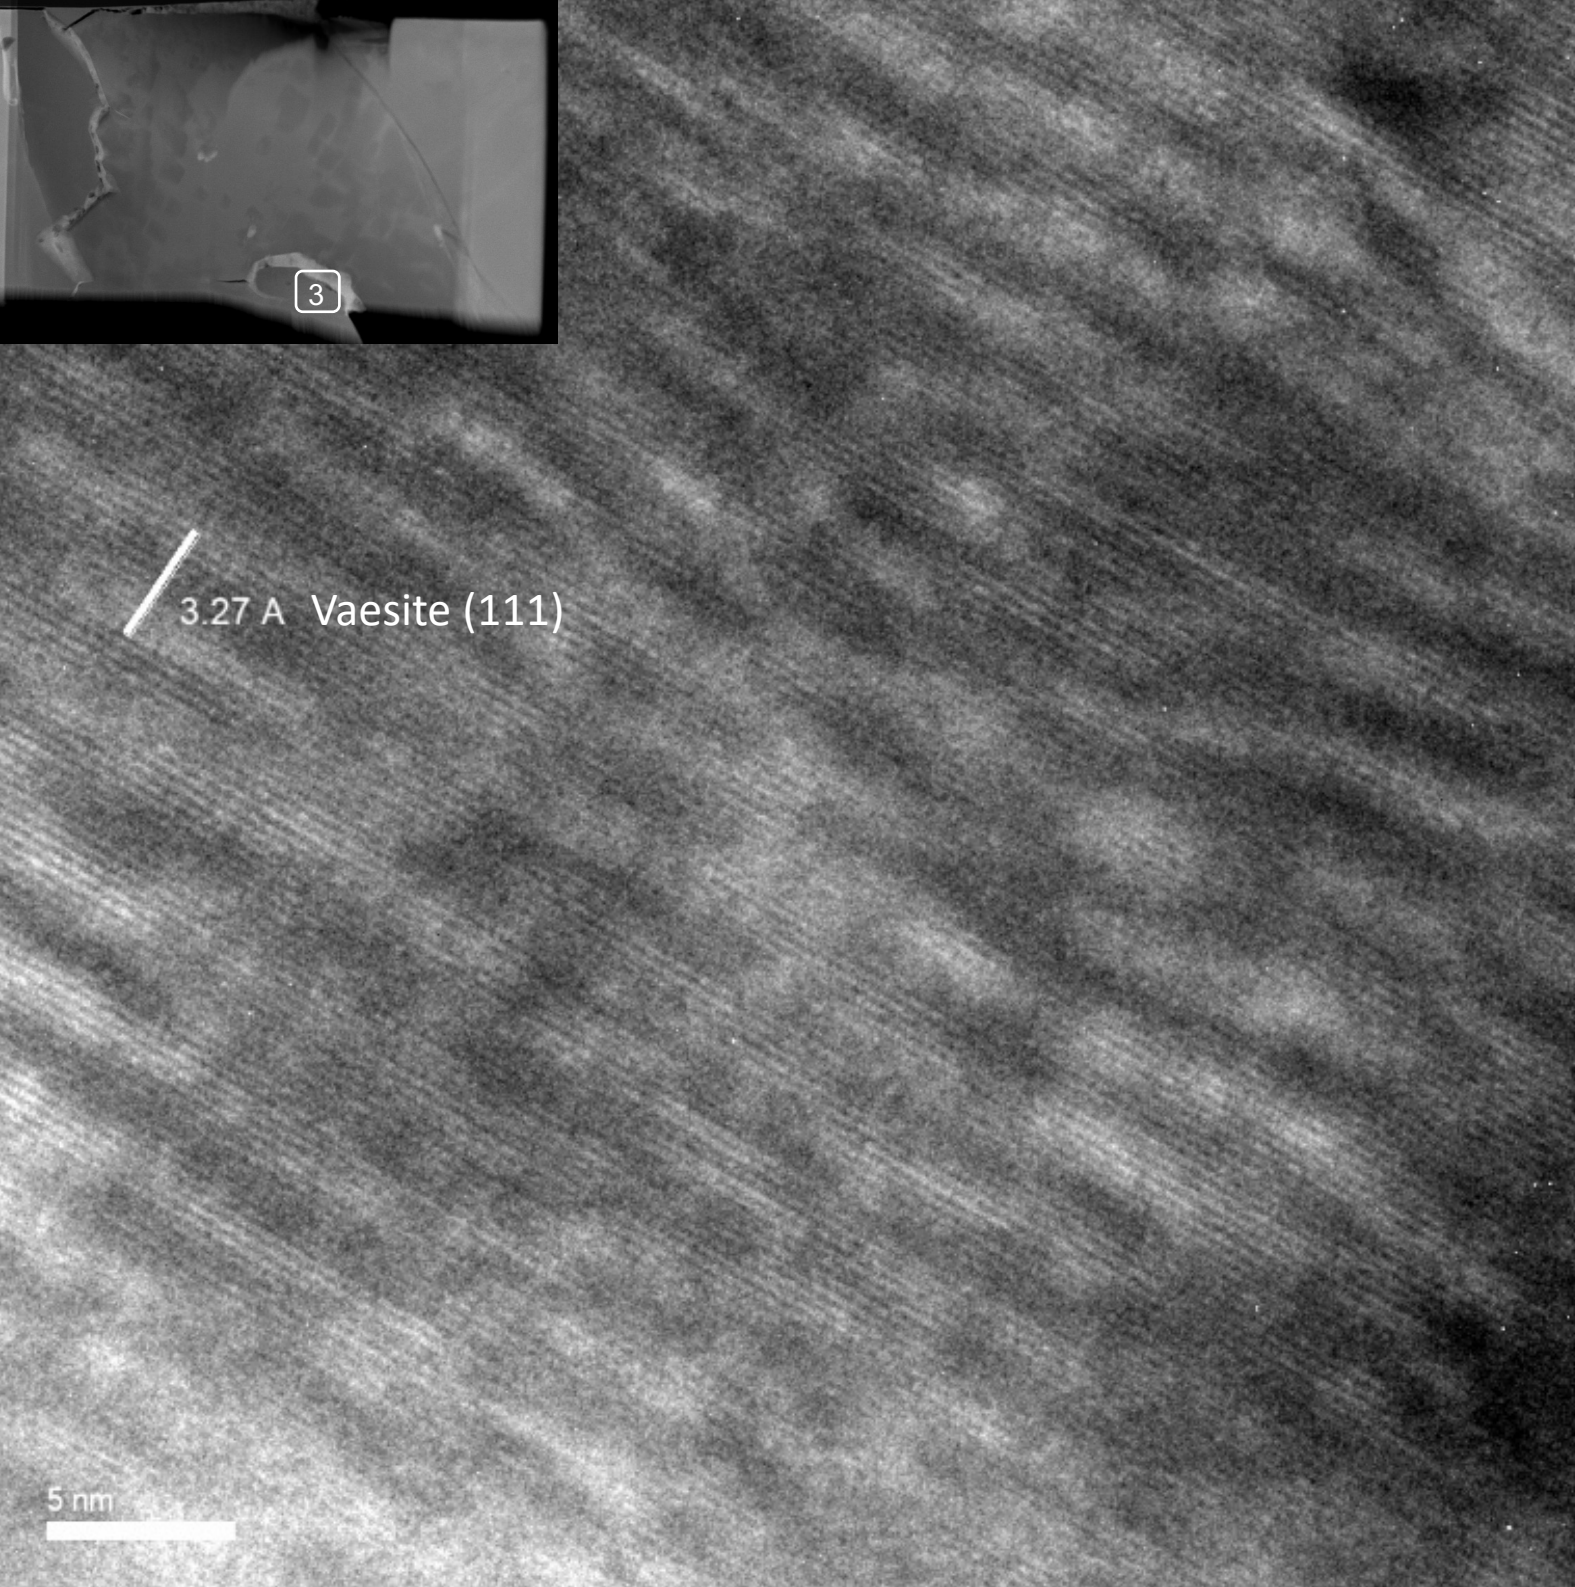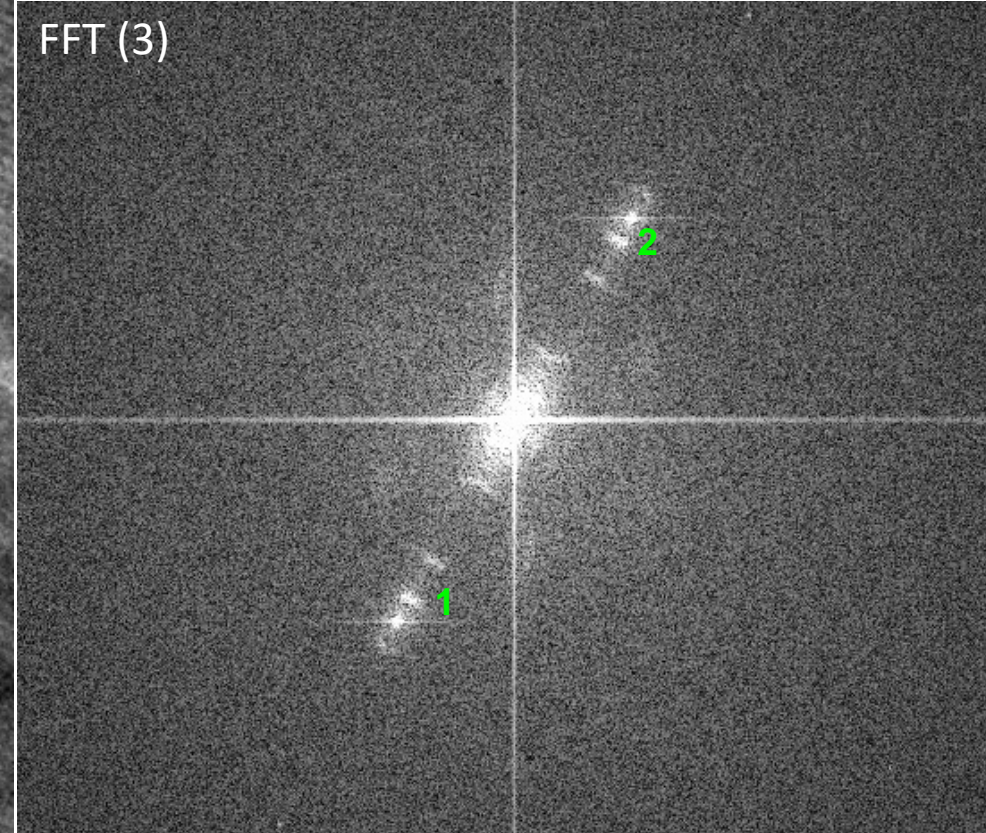

| Vaesite (NiS <sub>2</sub> ) (cubic; P3a) |                |       |                     |
|------------------------------------------|----------------|-------|---------------------|
| Spot#                                    | d-Spacing (nm) | (hkl) | Ideal d-Spacing (Å) |
| 1                                        | 0.321747       | (111) | 3.2773              |
| 2                                        | 0.326074       | (111) | 3.2773              |



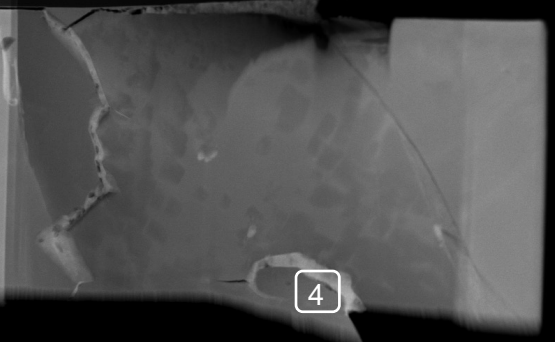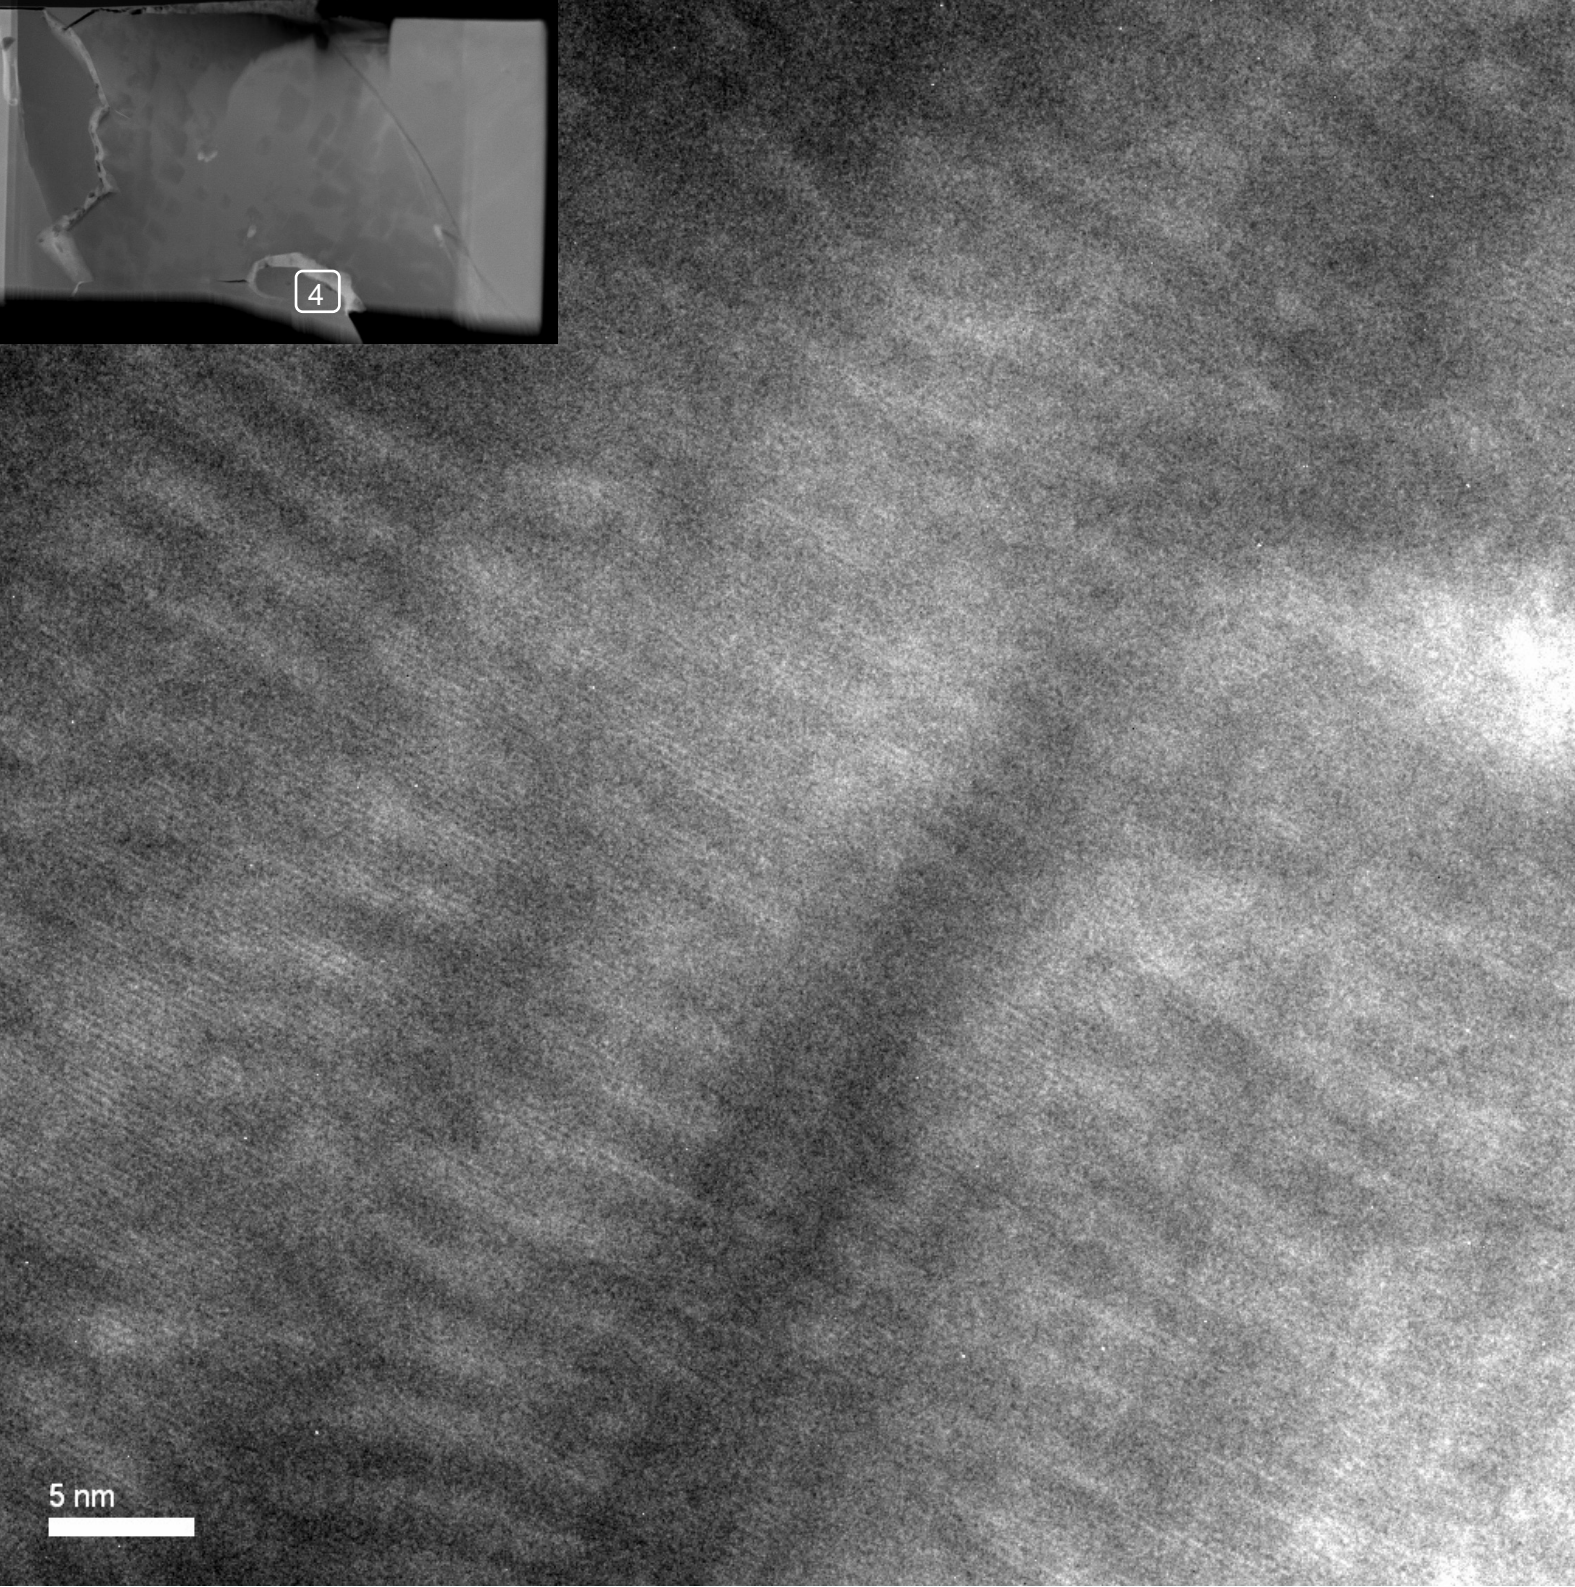

5 nm

FFT (4)

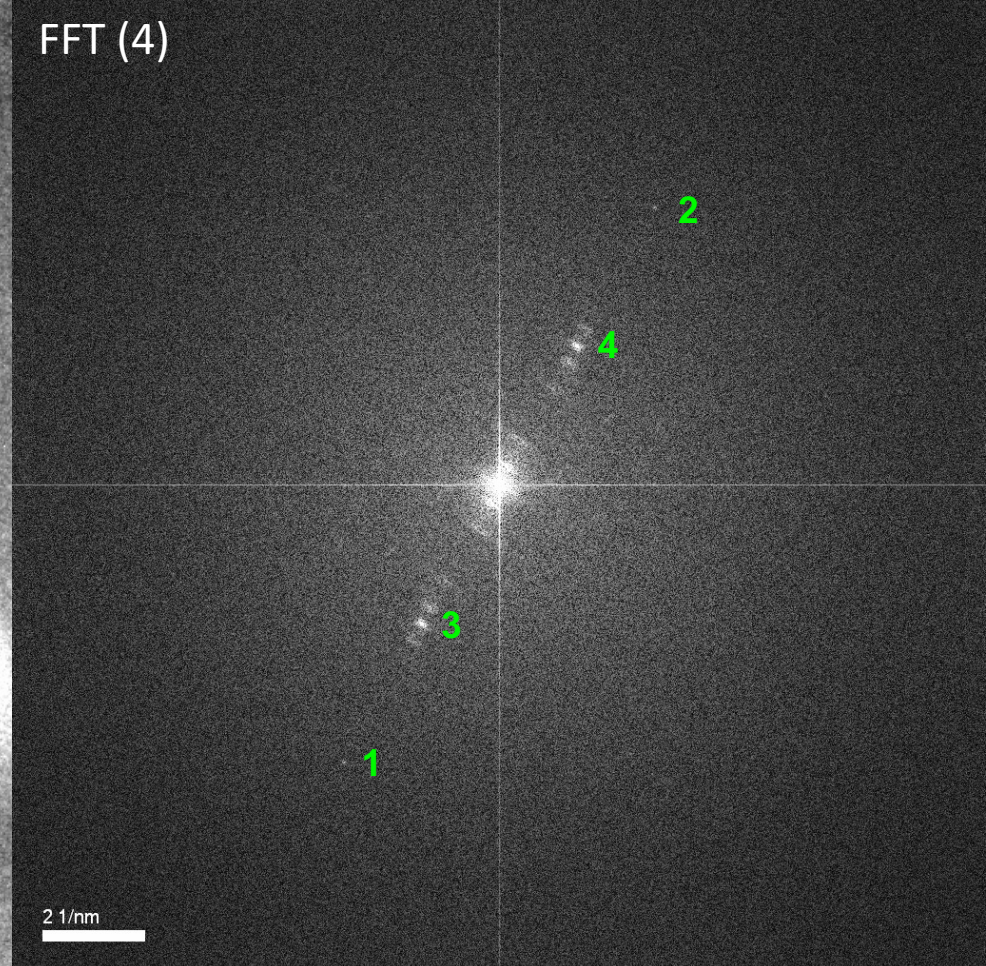

Vaesite (NiS<sub>2</sub>) (cubic; P3a)

| Spot# | d-Spacing (nm) | (hkl) | Ideal d-Spacing (Å) |
|-------|----------------|-------|---------------------|
| 1     | 0.162476       | (222) | 1.6387              |
| 2     | 0.163353       | (222) | 1.6387              |
| 3     | 0.323547       | (111) | 3.2773              |
| 4     | 0.328269       | (111) | 3.2773              |



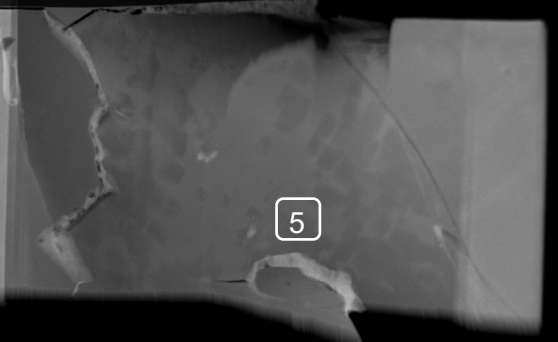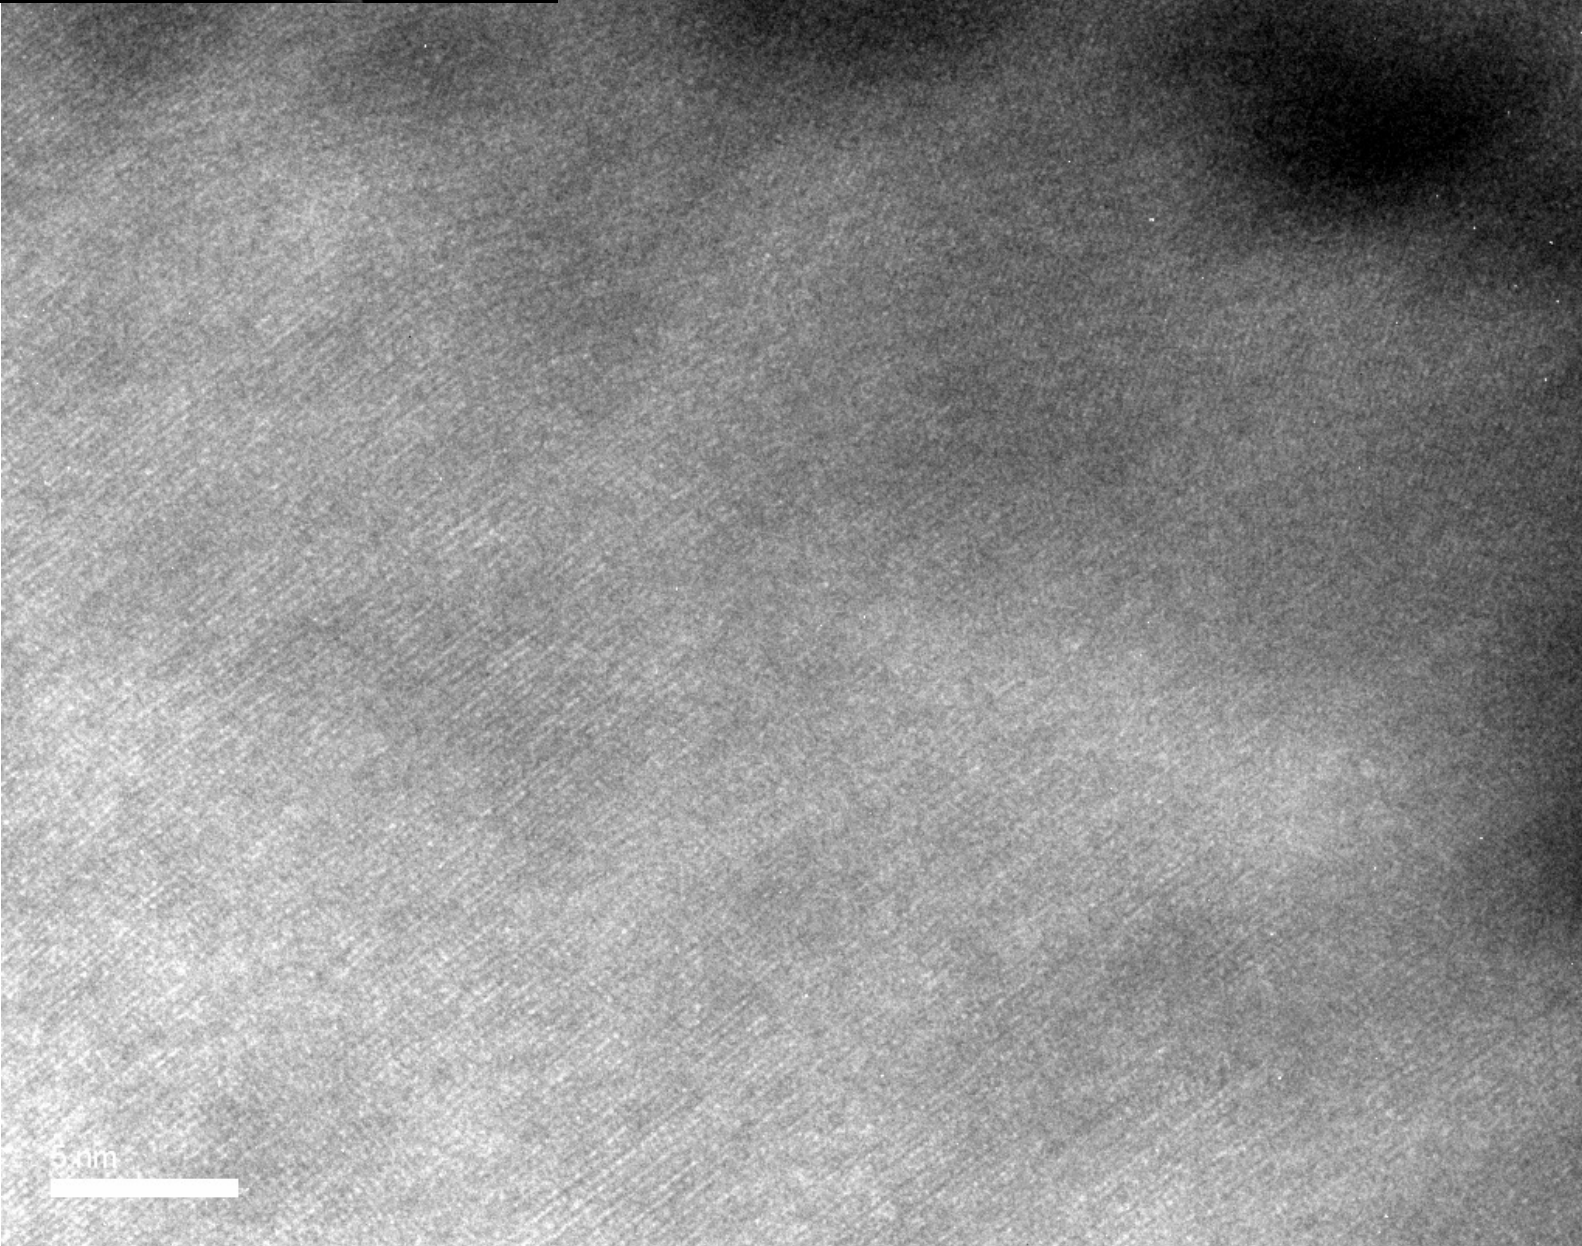

FFT (5)

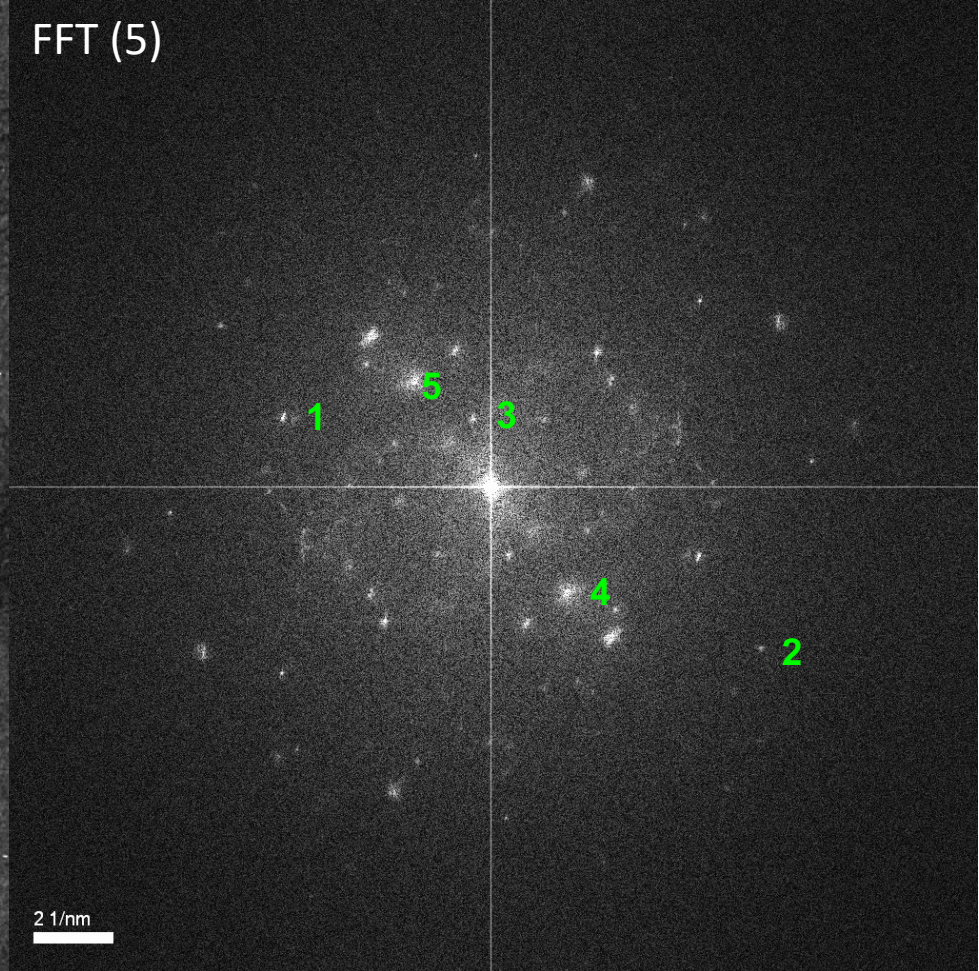Chalcopyrite (cubic;  $I\bar{4}2d/F\bar{4}3m$ )Pyrrhotite (FeS)(orthorhombic;  $Cmca$  polytype 5c)

| Spot# | d-Spacing (nm) | (hkl)        | Ideal d-Spacing (Å) |
|-------|----------------|--------------|---------------------|
| 1     | 0.184549       | $(220)_{cp}$ | 1.8484              |
| 2     | 0.184048       | $(220)_{cp}$ | 1.8484              |
| 3     | 0.576661       | $(110)_{Po}$ | 5.7606              |
| 4     | 0.303795       | $(112)_{cp}$ | 3.0387              |
| 5     | 0.30705        | $(112)_{cp}$ | 3.0387              |



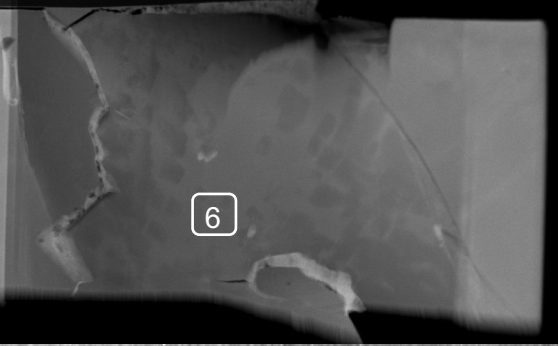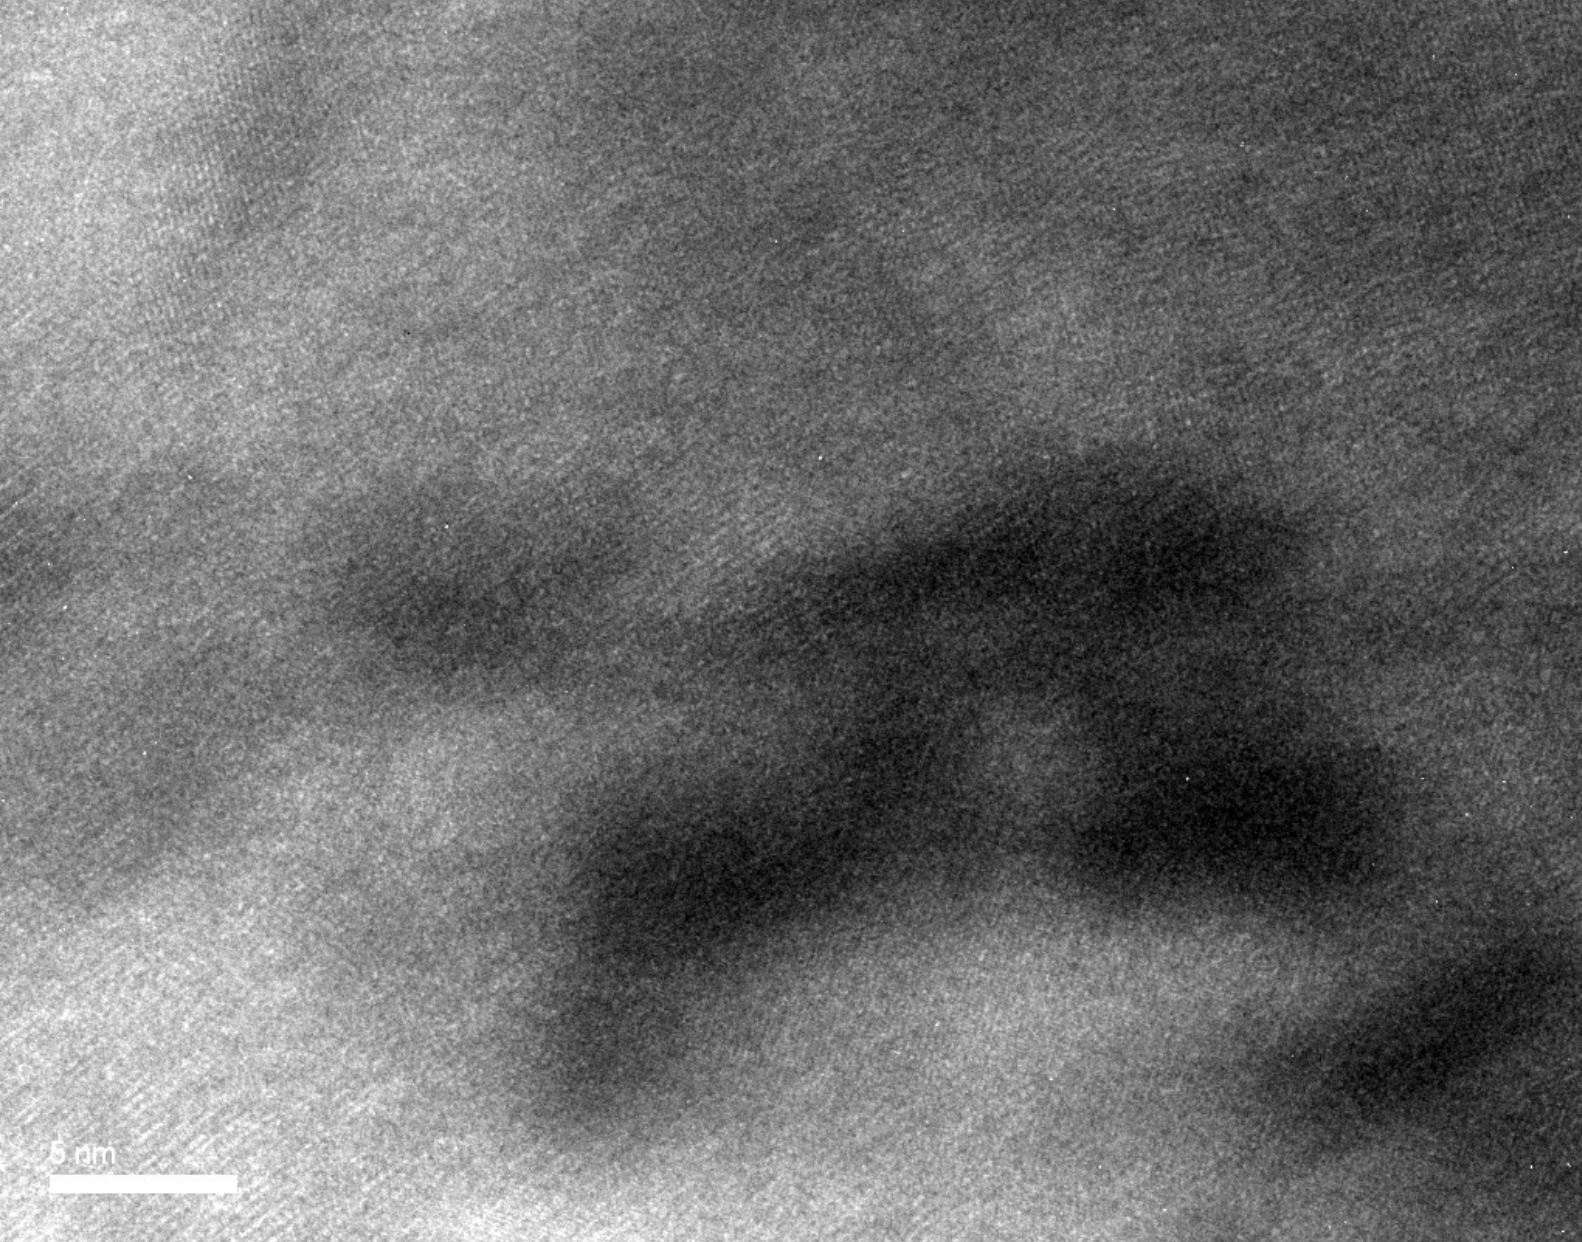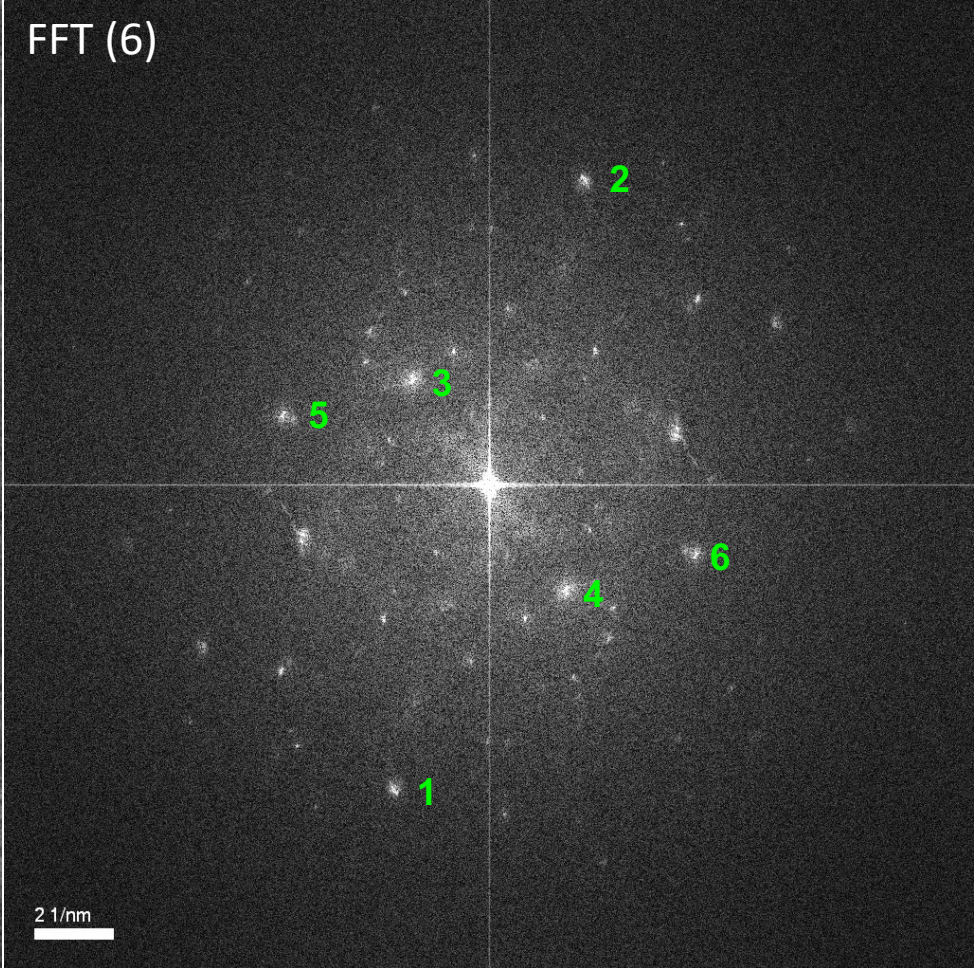

Chalcopyrite (cubic;  $I\bar{4}2d/F\bar{4}3m$ )

Pyrite ( $\text{FeS}_2$ ) (cubic;  $P3a$ )

| Spot# | d-Spacing (nm) | (hkl)               | Ideal d-Spacing (Å) |
|-------|----------------|---------------------|---------------------|
| 1     | 0.125447       | (331) <sub>py</sub> | 1.2425              |
| 2     | 0.125212       | (331) <sub>py</sub> | 1.2425              |
| 3     | 0.311431       | (112) <sub>cp</sub> | 3.0387              |
| 4     | 0.308141       | (112) <sub>cp</sub> | 3.0387              |
| 5     | 0.184527       | (220) <sub>cp</sub> | 1.8484              |
| 6     | 0.183992       | (220) <sub>cp</sub> | 1.8484              |



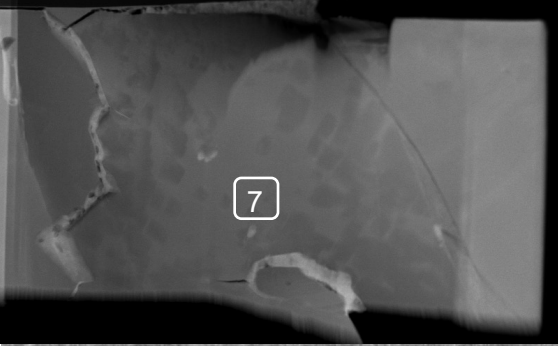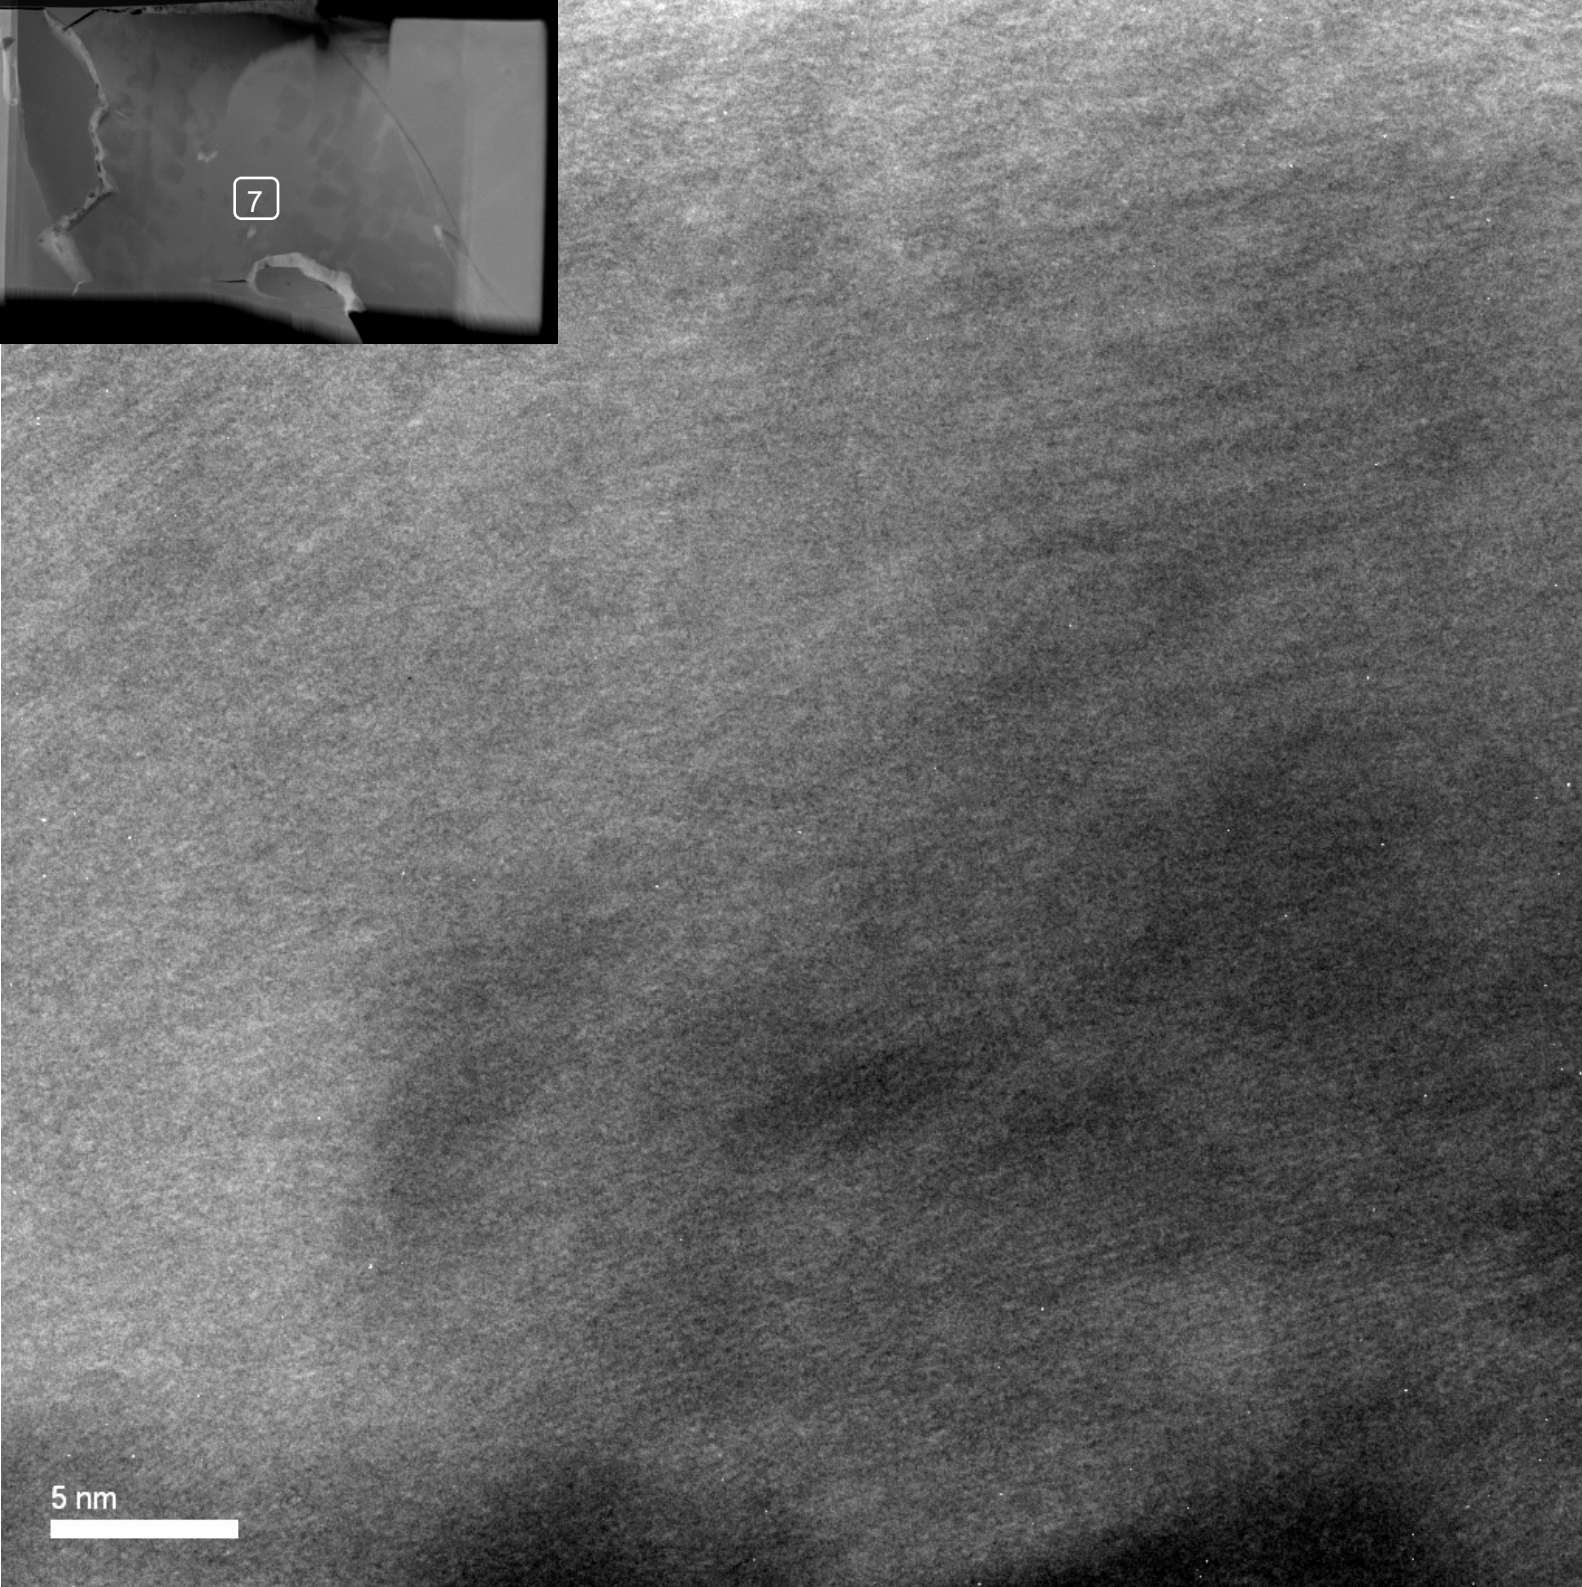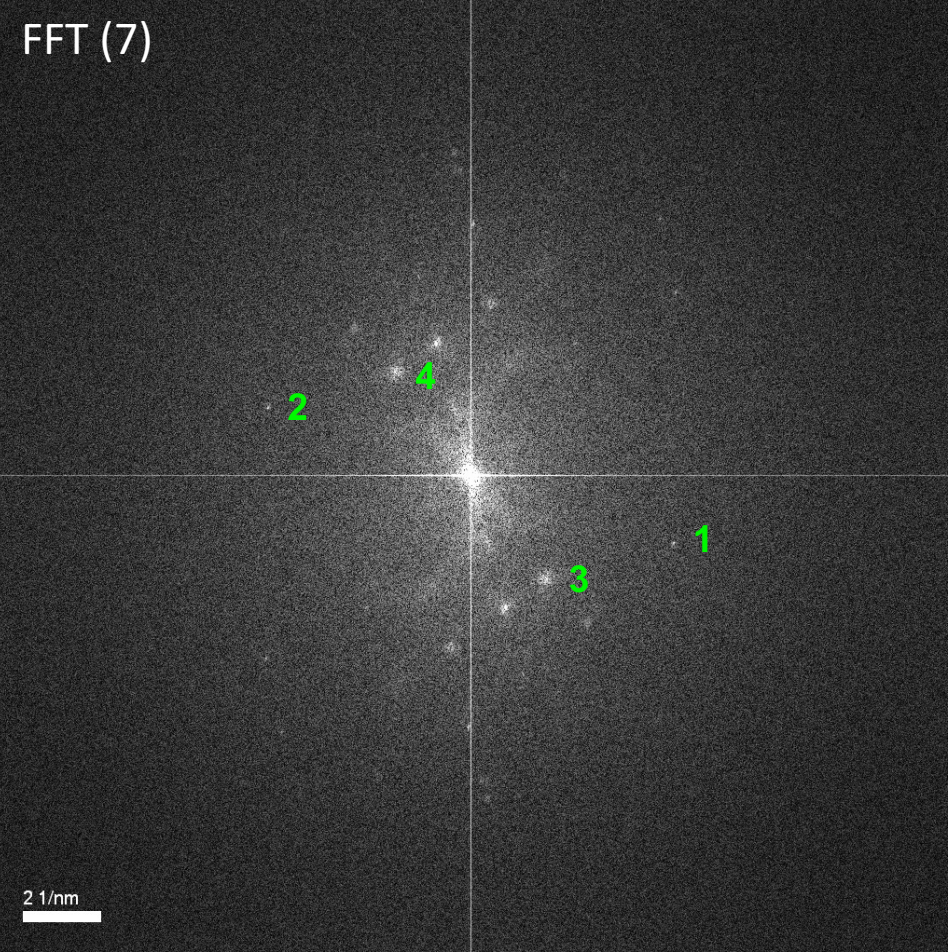

| Chalcopyrite (cubic; $I\bar{4}2d$ )       |                |                     |                     |
|-------------------------------------------|----------------|---------------------|---------------------|
| Pyrite ( $\text{FeS}_2$ ) (cubic; $P3a$ ) |                |                     |                     |
| Spot#                                     | d-Spacing (nm) | (hkl)               | Ideal d-Spacing (Å) |
| 1                                         | 0.184103       | $(204)_{\text{cp}}$ | 1.8365              |
| 2                                         | 0.184623       | $(204)_{\text{cp}}$ | 1.8365              |
| 3                                         | 0.310144       | $(204)_{\text{py}}$ | 3.1269              |
| 4                                         | 0.314008       | $(204)_{\text{py}}$ | 3.1269              |



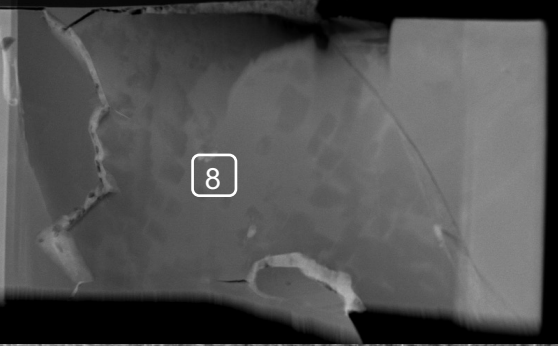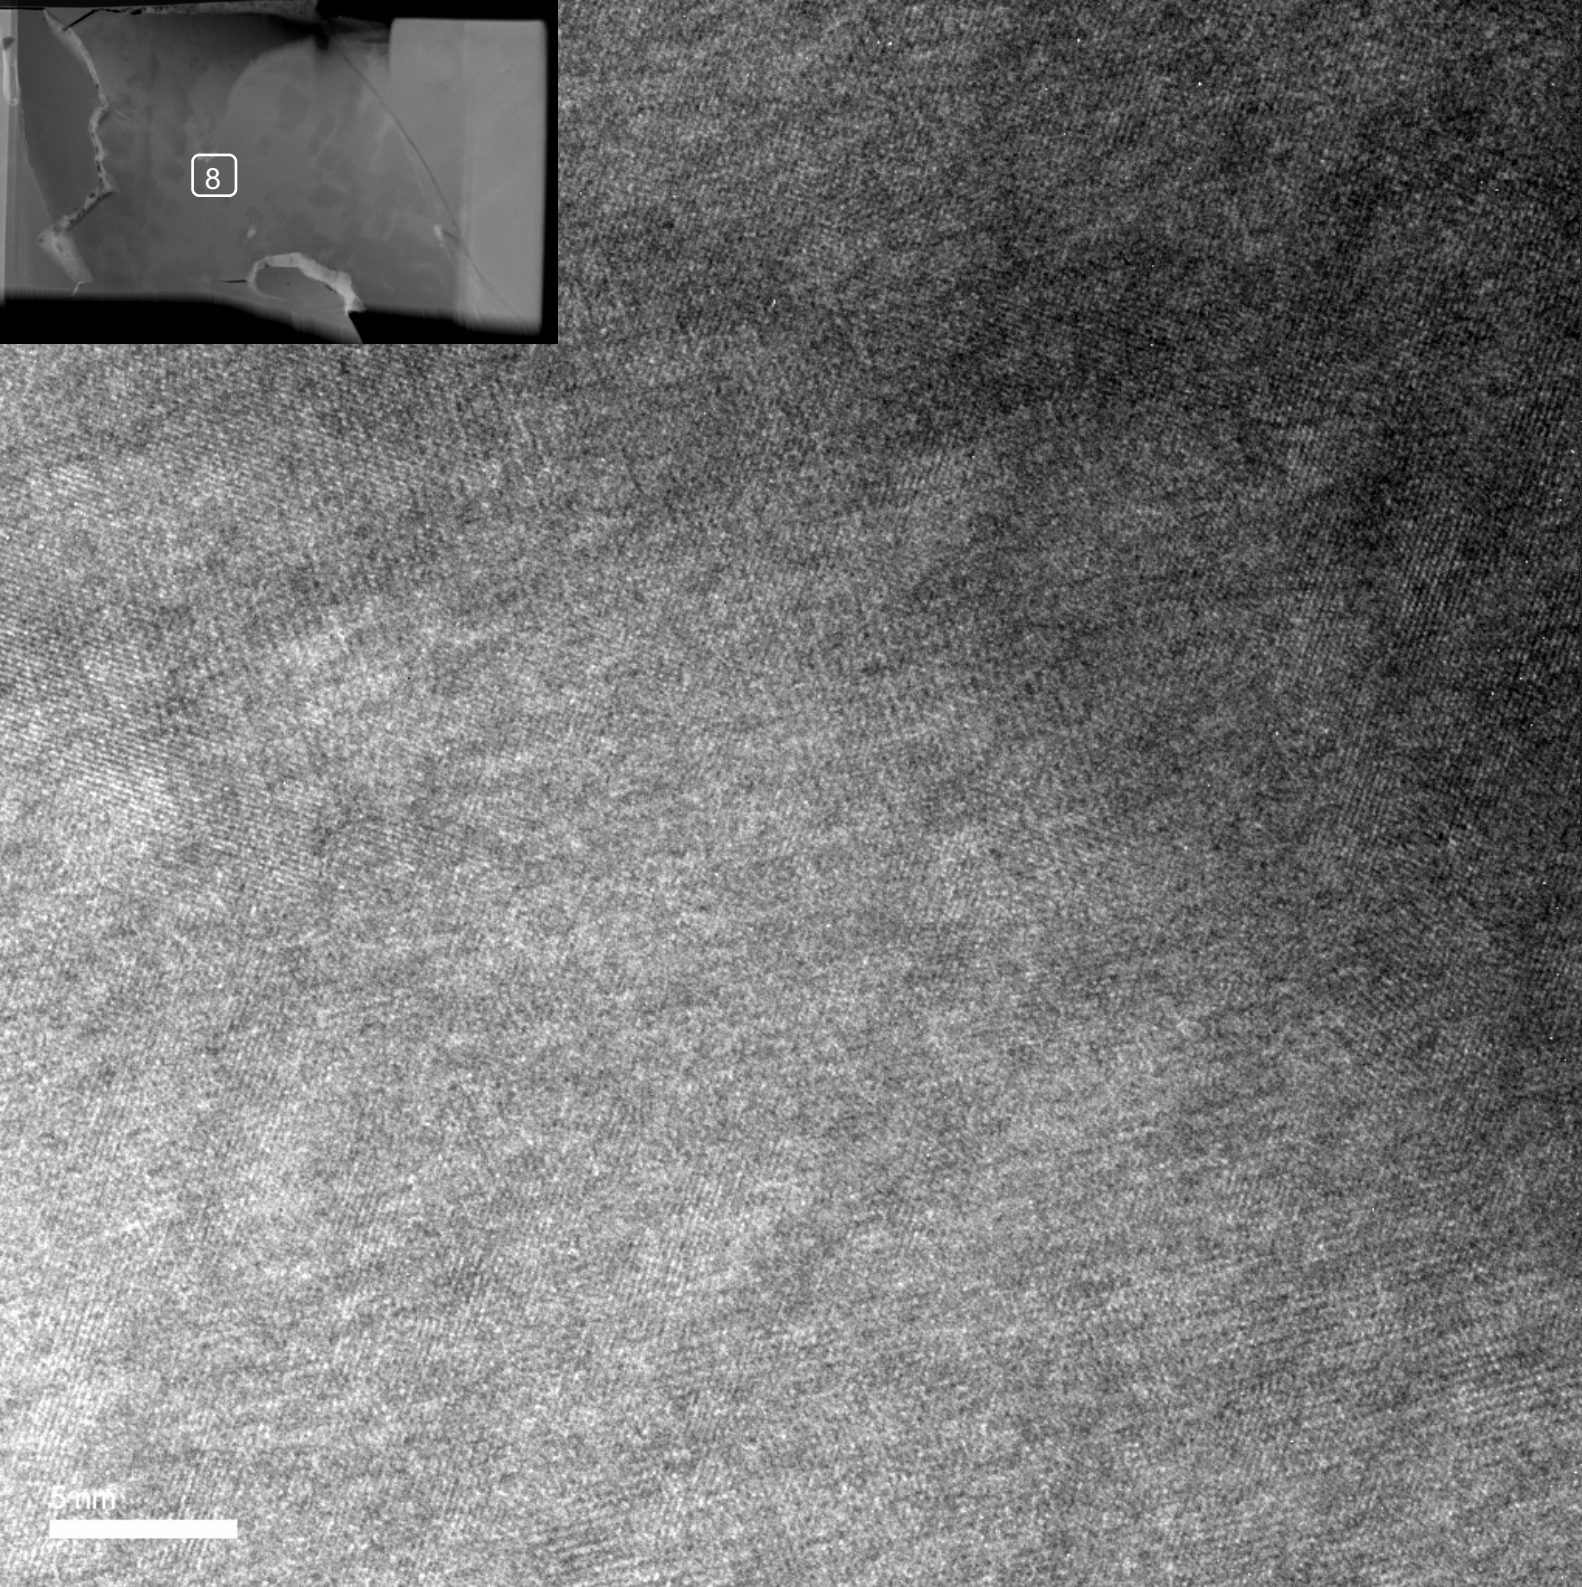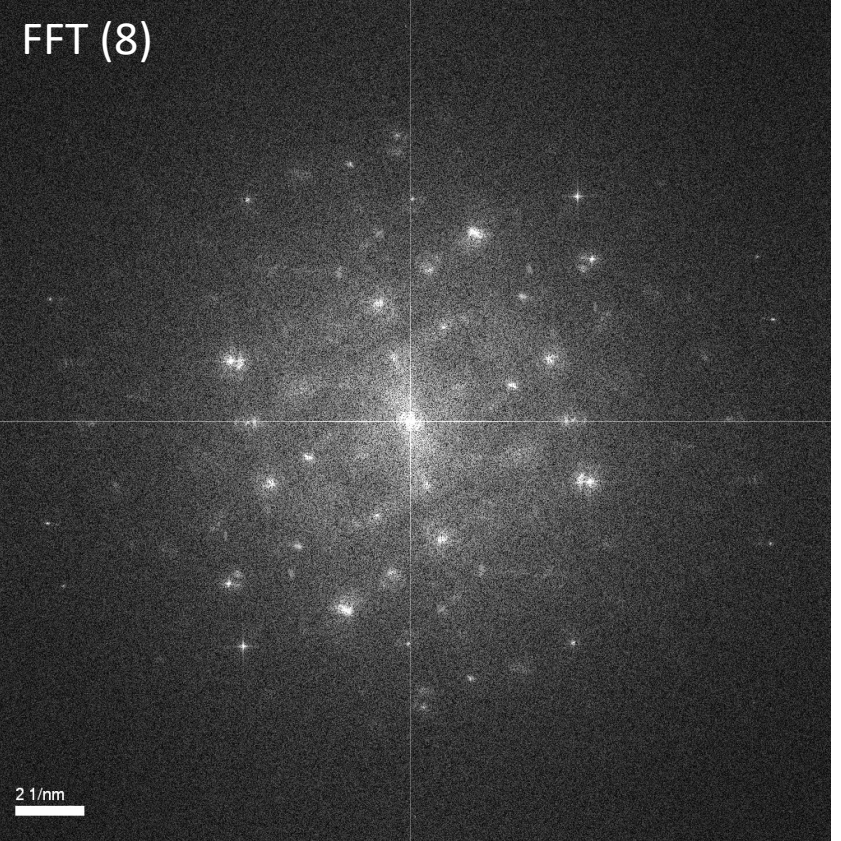

| Chalcopyrite (cubic; $I\bar{4}2d/F-43m$ ) |                |                     |                     |
|-------------------------------------------|----------------|---------------------|---------------------|
| Pyrite ( $\text{FeS}_2$ ) (cubic; $P3a$ ) |                |                     |                     |
| Spot#                                     | d-Spacing (nm) | (hkl)               | Ideal d-Spacing (Å) |
| 1                                         | 0.123584       | $(331)_{\text{py}}$ | 1.2425              |
| 2                                         | 0.124185       | $(331)_{\text{py}}$ | 1.2425              |
| 5                                         | 0.183521       | $(220)_{\text{cp}}$ | 1.8484              |
| 6                                         | 0.184056       | $(220)_{\text{cp}}$ | 1.8484              |
| 15                                        | 0.132009       | $(400)_{\text{cp}}$ | 1.3100-1.3223       |
| 16                                        | 0.131226       | $(400)_{\text{cp}}$ | 1.3100-1.3223       |
| 17                                        | 0.544573       | $(001)_{\text{mc}}$ | 5.4320              |



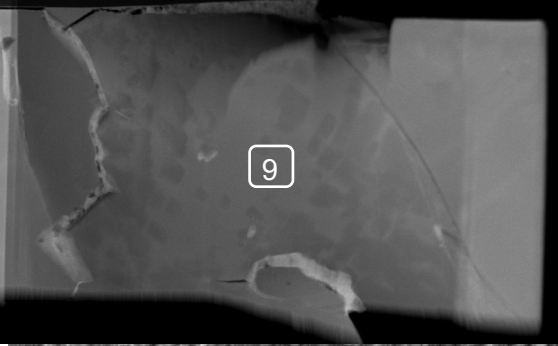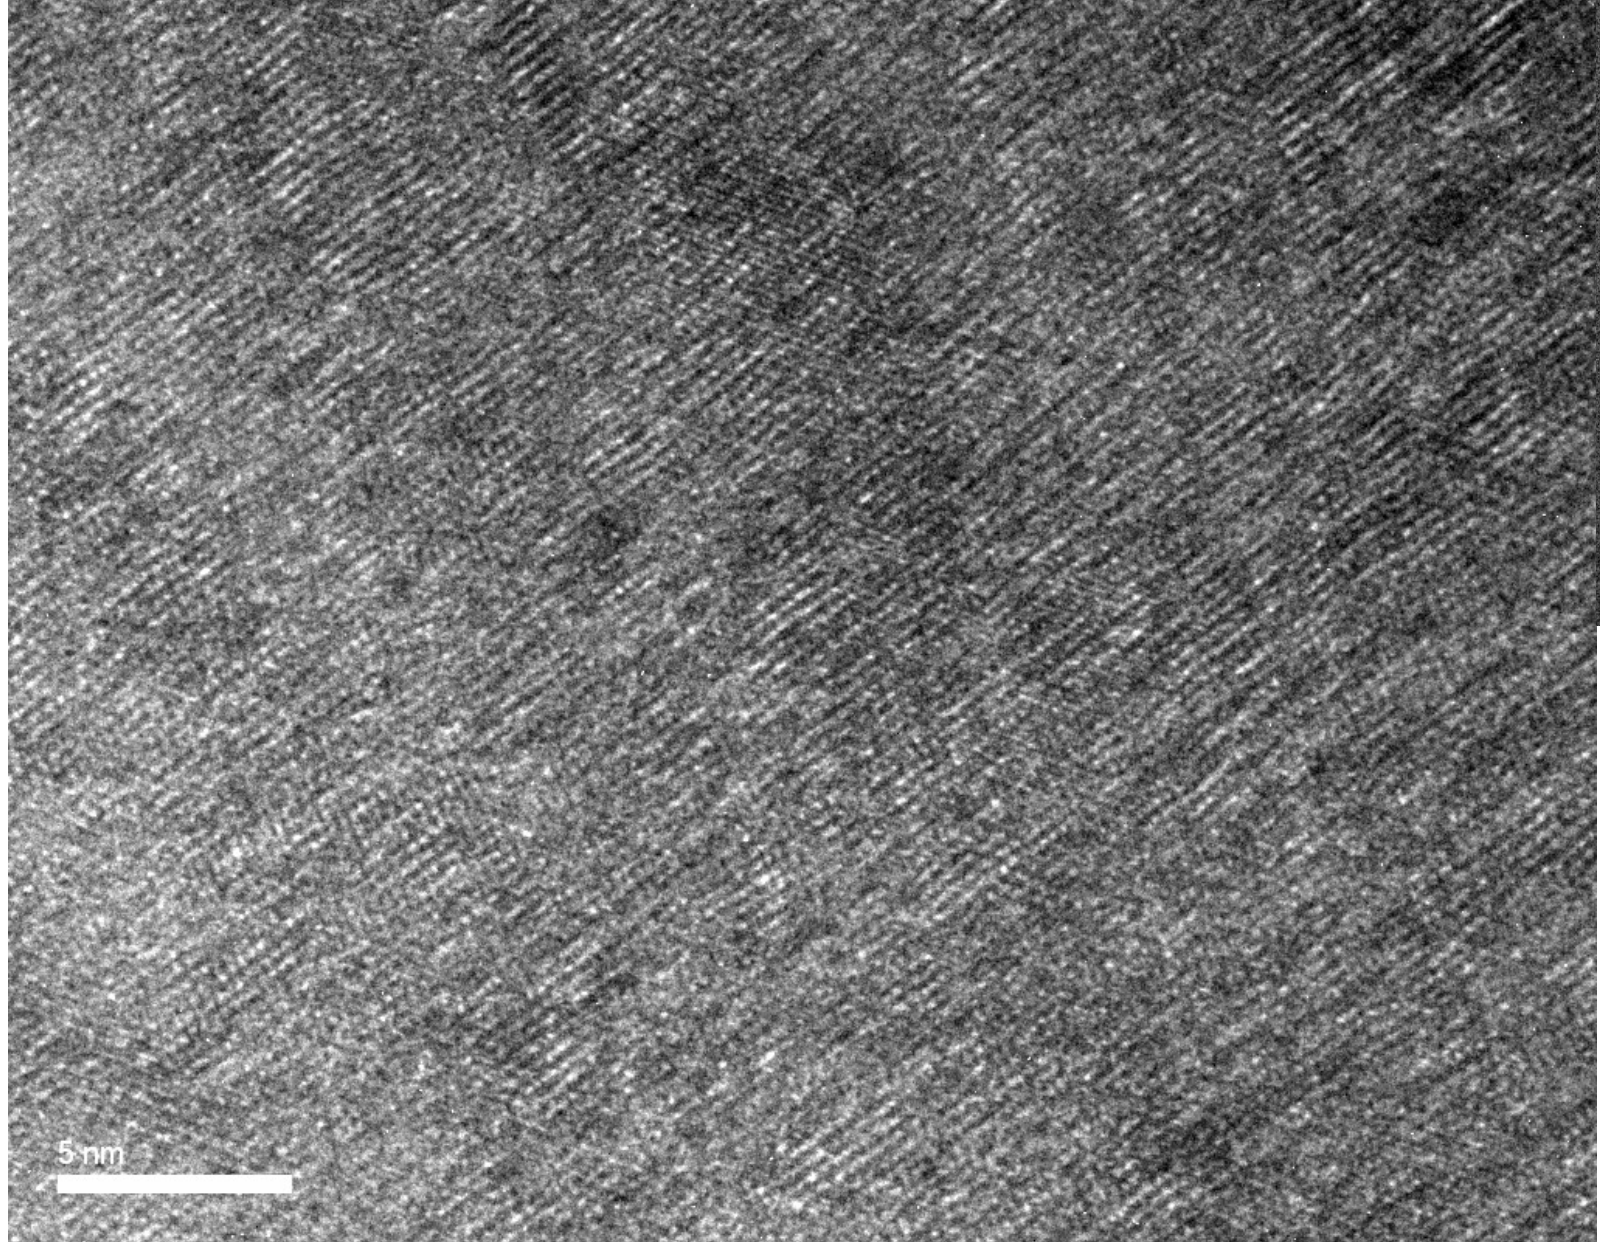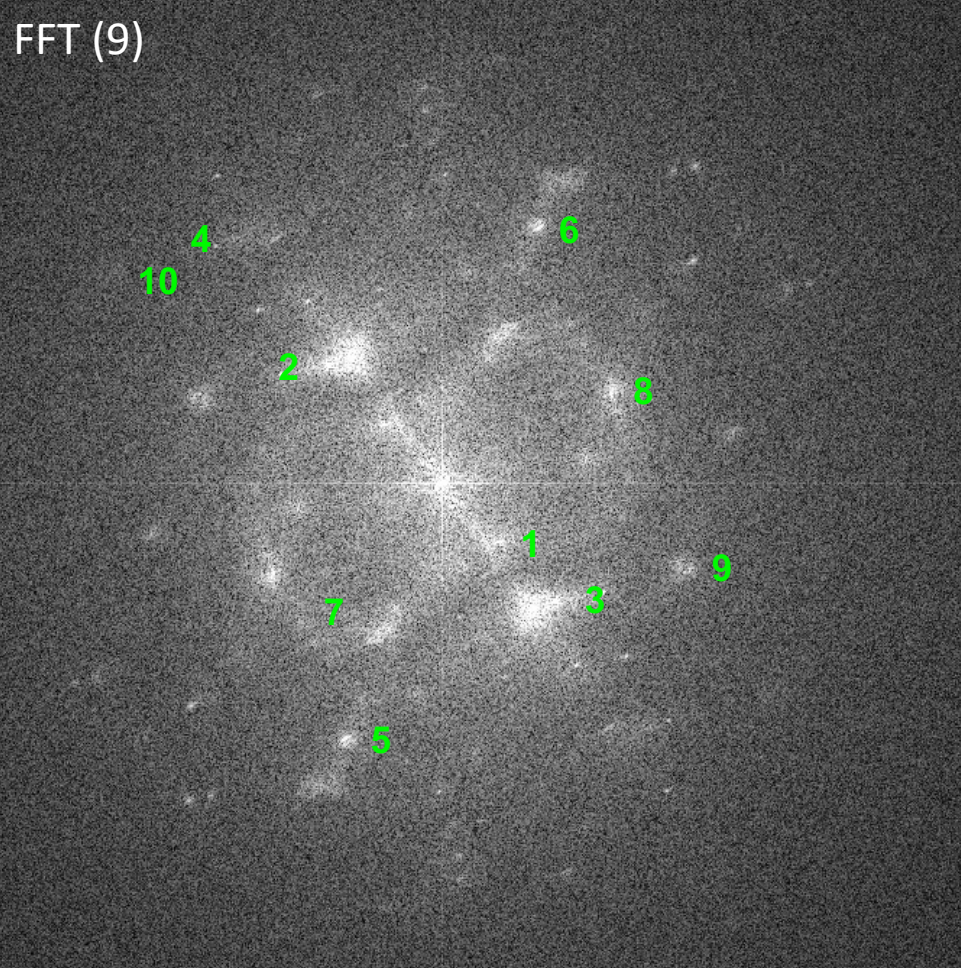

| Chalcopyrite (cubic; I42d)                       |                |                     |                     |
|--------------------------------------------------|----------------|---------------------|---------------------|
| Pyrrhotite (FeS)(orthorhombic; Cmca polytype 5c) |                |                     |                     |
| Spot#                                            | d-Spacing (nm) | (hkl)               | Ideal d-Spacing (Å) |
| 1                                                | 0.584782       | (001) <sub>Po</sub> | 5.8439-5.8456       |
| 2                                                | 0.597333       | (001) <sub>Po</sub> | 5.8439-5.8456       |
| 3                                                | 0.29552        | (220) <sub>Po</sub> | 2.9848              |
| 4                                                | 0.297605       | (220) <sub>Po</sub> | 2.9848              |
| 7                                                | 0.250115       | (004) <sub>Cp</sub> | 2.5750              |
| 8                                                | 0.257426       | (004) <sub>Cp</sub> | 2.5750              |
| 9                                                | 0.18631        | (220) <sub>Cp</sub> | 1.8699              |
| 10                                               | 0.187105       | (220) <sub>Cp</sub> | 1.8699              |



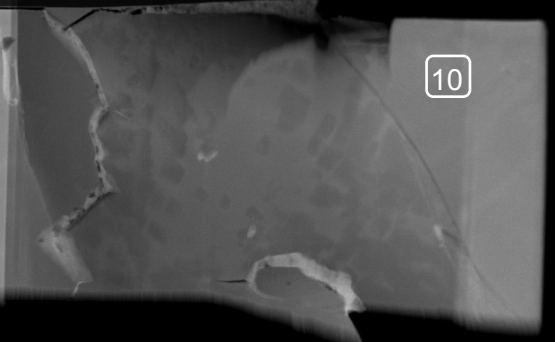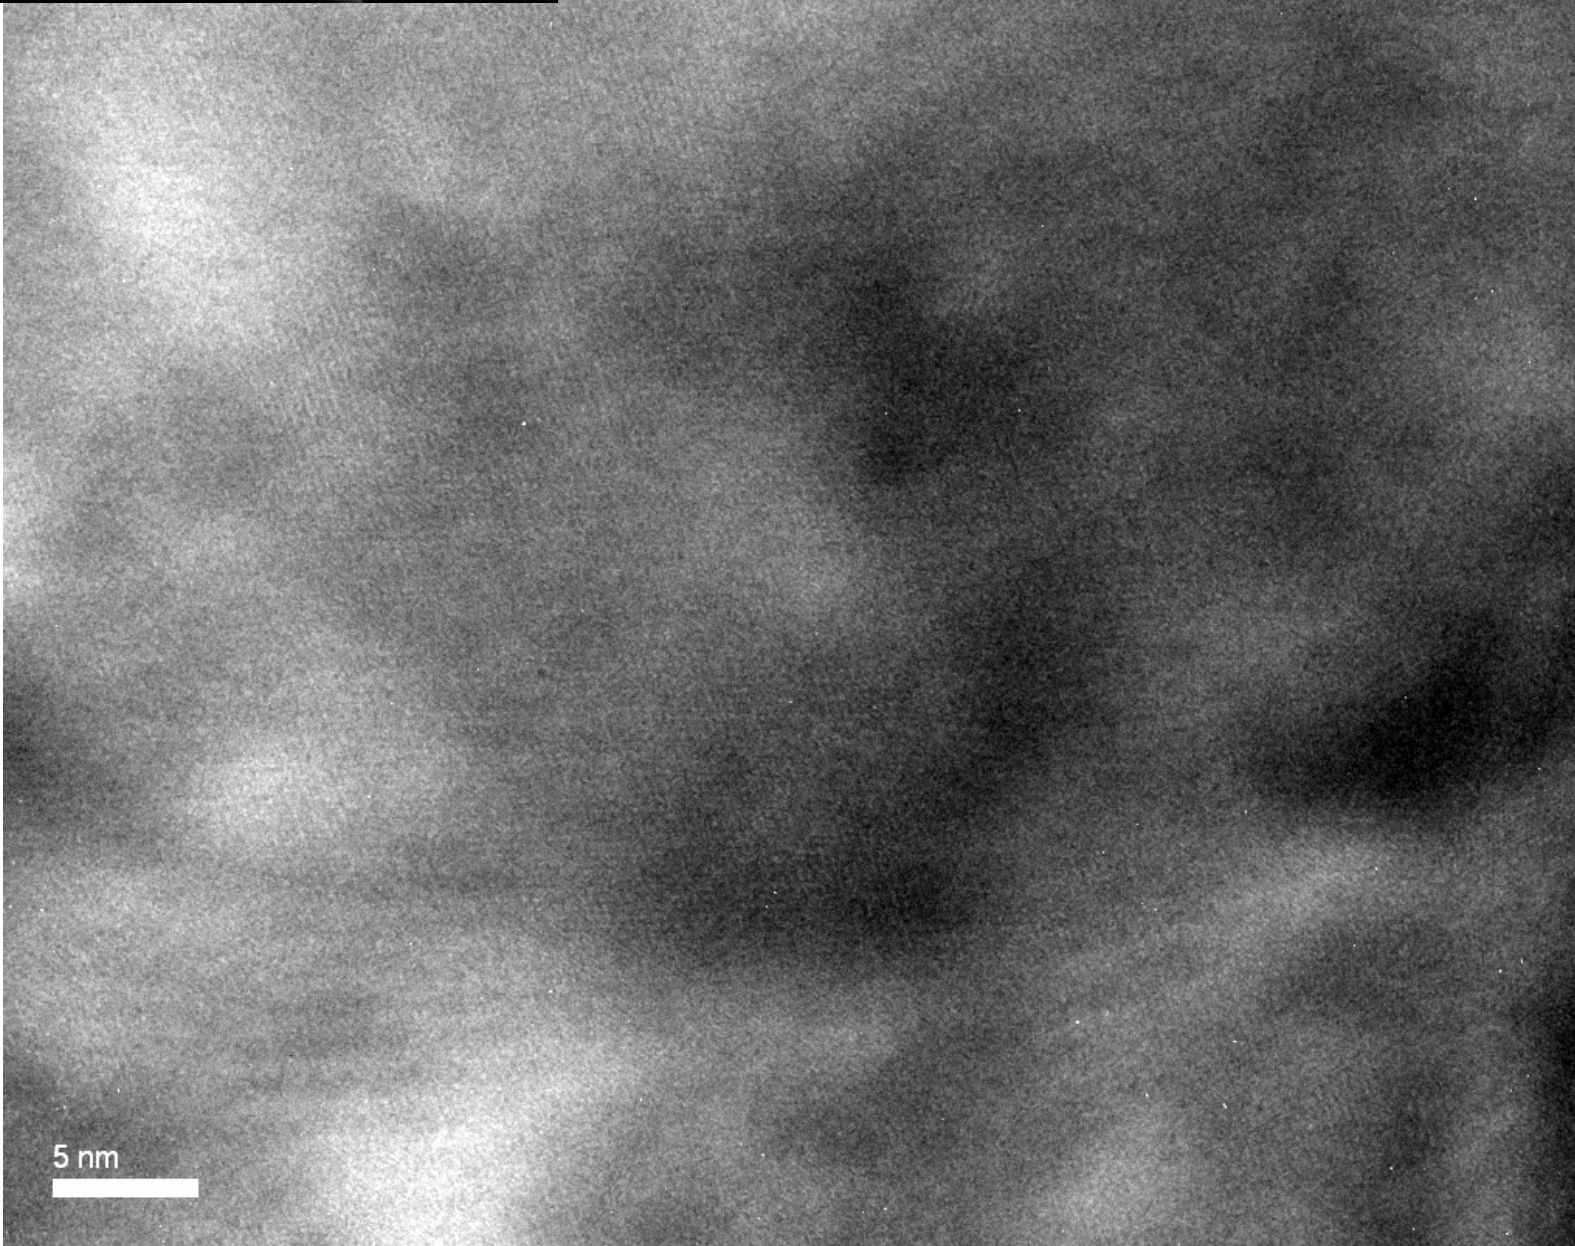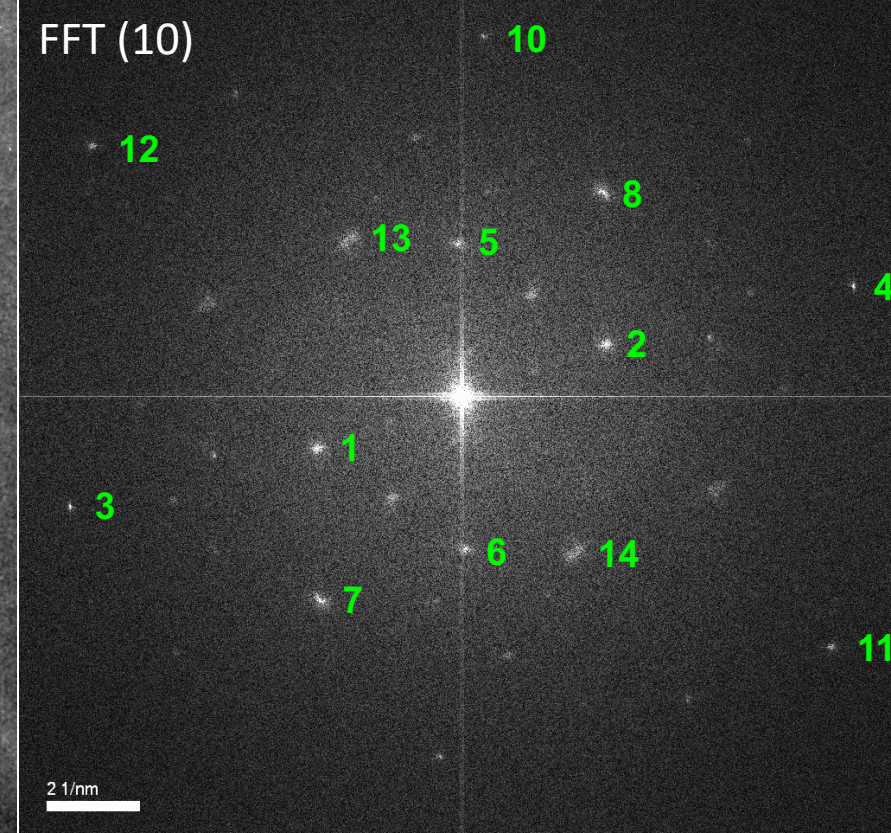

Pyrite (FeS<sub>2</sub>) (cubic; P3a)

Marcasite (FeS<sub>2</sub>) (orthorrombic; Pnnm)

Pyrrhotite (FeS)(orthorrombic; Cmca polytype 5c)

| Spot# | d-Spacing (nm) | (hkl)                                     | Ideal d-Spacing (Å) |
|-------|----------------|-------------------------------------------|---------------------|
| 1     | 0.3056         | (028) <sub>Po</sub>                       | 3.0698              |
| 2     | 0.306897       | (028) <sub>Po</sub>                       | 3.0698              |
| 3     | 0.115714       | (240) <sub>Mc</sub>                       | 1.15576             |
| 4     | 0.115841       | (240) <sub>Mc</sub>                       | 1.15576             |
| 5     | 0.309349       | (028) <sub>Po</sub>                       | 3.0698              |
| 6     | 0.305667       | (028) <sub>Po</sub>                       | 3.0698              |
| 7     | 0.189293       | (121) <sub>Mc</sub> / (202) <sub>Py</sub> | 1.9113/1.9151       |
| 8     | 0.189881       | (121) <sub>Mc</sub> / (202) <sub>Py</sub> | 1.9113/1.9151       |
| 9     | 0.130366       | (212) <sub>Mc</sub>                       | 1.3071              |
| 10    | 0.130734       | (212) <sub>Mc</sub>                       | 1.3071              |
| 11    | 0.105281       | (312) <sub>Mc</sub>                       | 1.0921              |
| 12    | 0.106091       | (312) <sub>Mc</sub>                       | 1.0921              |
| 13    | 0.243217       | (111) <sub>Mc</sub> / (210) <sub>Py</sub> | 2.4126/2.4224       |
| 14    | 0.241413       | (111) <sub>Mc</sub> / (210) <sub>Py</sub> | 2.4126/2.4224       |



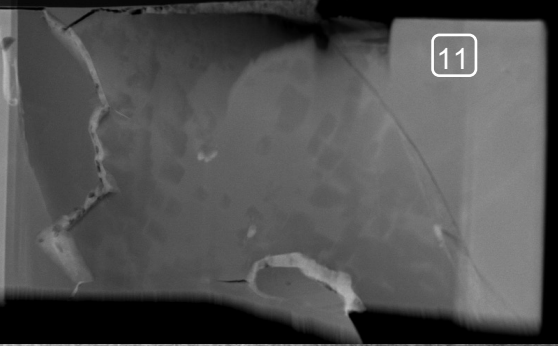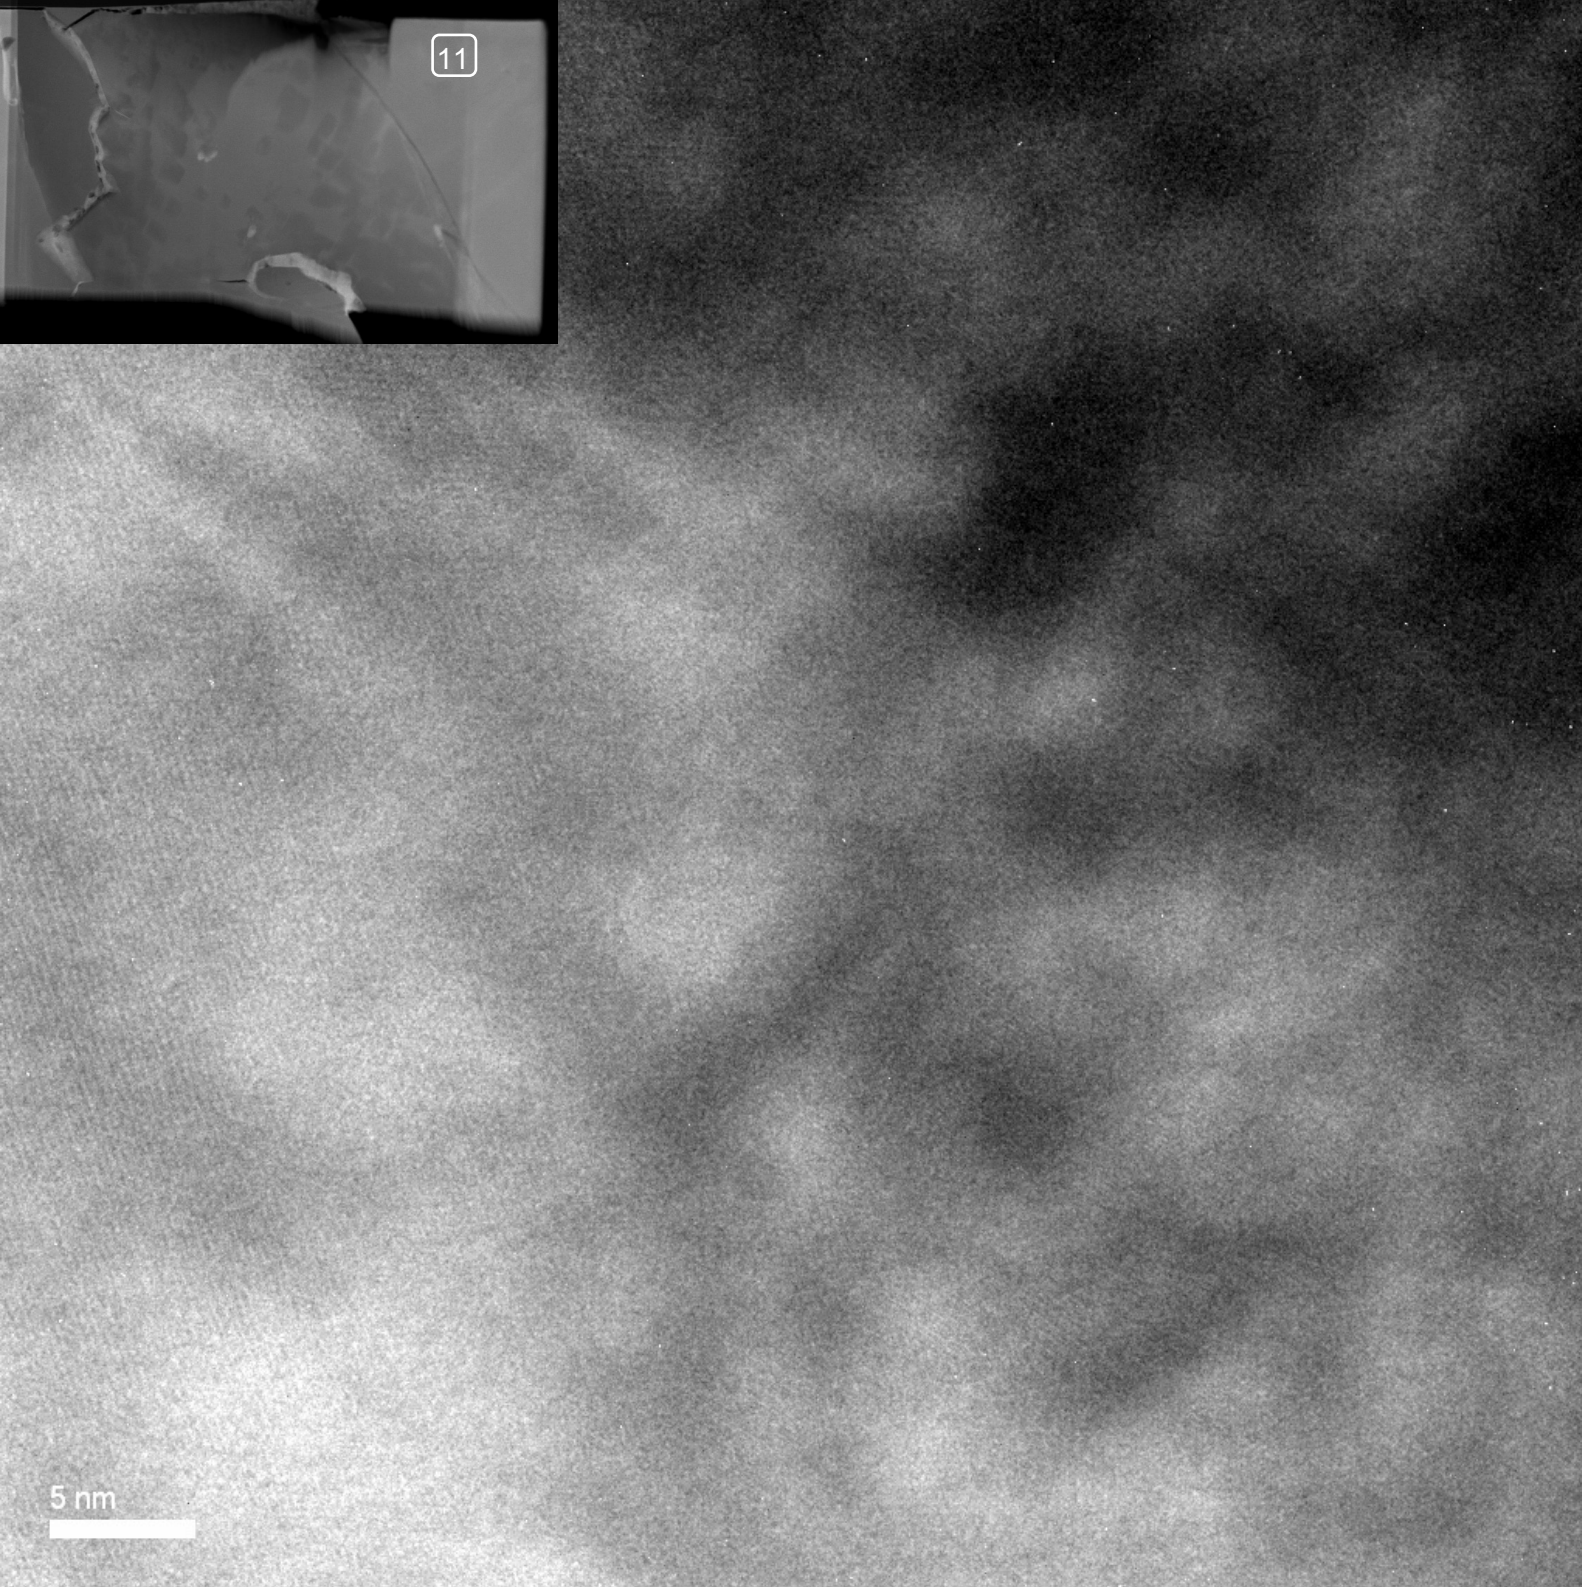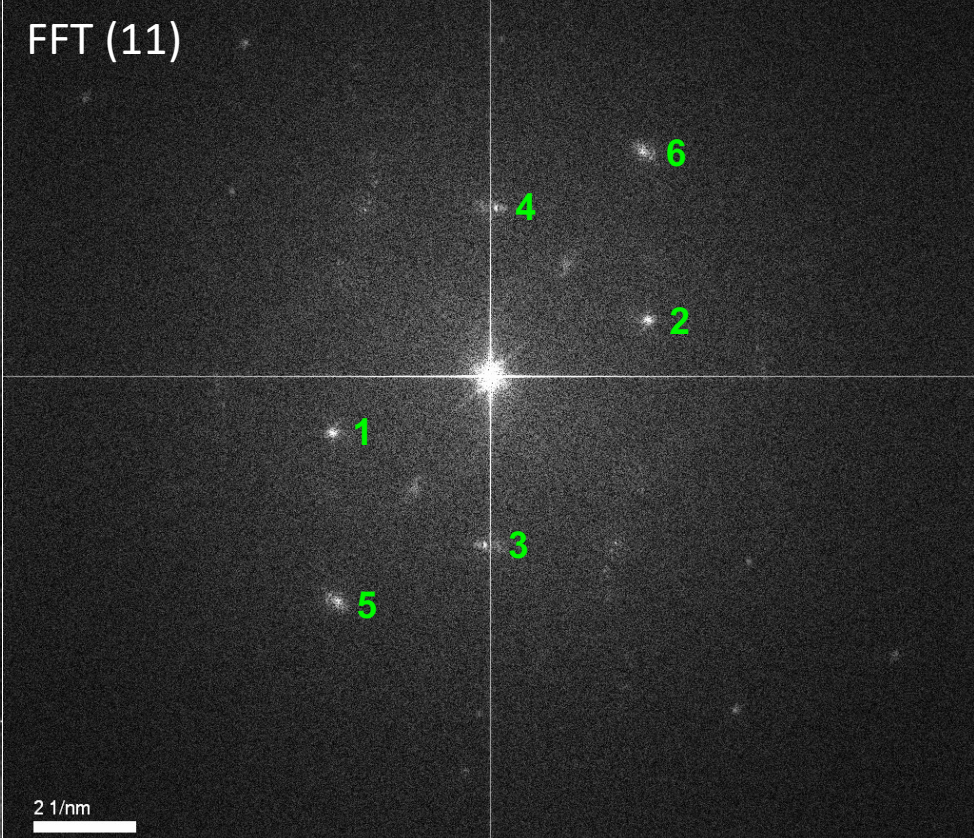

| Pyrite (FeS <sub>2</sub> ) (cubic; P3a)            |                |                                           |                     |
|----------------------------------------------------|----------------|-------------------------------------------|---------------------|
| Marcasite (FeS <sub>2</sub> ) (orthorrombic; Pnnm) |                |                                           |                     |
| Pyrrhotite (FeS)(orthorrombic; Cmca polytype 5c)   |                |                                           |                     |
| Spot#                                              | d-Spacing (nm) | (hkl)                                     | Ideal d-Spacing (Å) |
| 1                                                  | 0.307257       | (028) <sub>Po</sub>                       | 3.0698              |
| 2                                                  | 0.308719       | (028) <sub>Po</sub>                       | 3.0698              |
| 3                                                  | 0.305617       | (028) <sub>Po</sub>                       | 3.0698              |
| 4                                                  | 0.309521       | (028) <sub>Po</sub>                       | 3.0698              |
| 5                                                  | 0.189486       | (121) <sub>Mc</sub> / (202) <sub>Py</sub> | 1.9113/1.9151       |
| 6                                                  | 0.190879       | (121) <sub>Mc</sub> / (202) <sub>Py</sub> | 1.9113/1.9151       |
