# Supplementary material for: Sulfide mineralogy of igneous basic rocks (ophites) from the external zone of the Betic Cordillera
Source: Copernicus journal article supplement (doi:10.5194/ejm-37-191-2025), 2025-03-20
Supplement: Supplementary file 3 [file ejm-37-191-2025-supplement.zip]

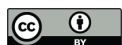

*Supplement of*

**Sulfide mineralogy of igneous basic rocks (ophites) from the external zone of the Betic Cordillera**

**José M. González-Jiménez et al.**

*Correspondence to:* José M. González-Jiménez ([jm.gonzalez.j@csic.es](mailto:jm.gonzalez.j@csic.es))

- [ejm-37-191-2025-supplement-title-page.pdf](#)
- [File S1\\_whole rock.xlsx](#)
- [File S2\\_EMPA\\_silicates.xlsx](#)
- [File S3\\_LAICPMS\\_clinopyroxene.xlsx](#)
- [File S4\\_EPMA\\_Sulfide- PROOFREADING.xls](#)
- [File S5\\_Nanosctructural analysis magmatic sulfides.pdf](#)
- [File S6\\_Nanosctructural analysis-Postmagmatic sulfides.pdf](#)

The copyright of individual parts of the supplement might differ from the article licence.
